# Supplementary material for: Associations between physical exercise patterns and pain symptoms in individuals with endometriosis: a cross-sectional mHealth-based investigation
Source: PubMed Central journal article supplement — BMJ Open. 2022 Jul 18;12(7):e059280. doi: 10.1136/bmjopen-2021-059280 (PMC9297219; doi:10.1136/bmjopen-2021-059280), 2022-07-18
Supplement: bmjopen-2021-059280.draft_revisions.pdf [file bmjopen-2021-059280.draft_revisions.pdf]

# BMJ Open

BMJ Open is committed to open peer review. As part of this commitment we make the peer review history of every article we publish publicly available.

When an article is published we post the peer reviewers' comments and the authors' responses online. We also post the versions of the paper that were used during peer review. These are the versions that the peer review comments apply to.

The versions of the paper that follow are the versions that were submitted during the peer review process. They are not the versions of record or the final published versions. They should not be cited or distributed as the published version of this manuscript.

BMJ Open is an open access journal and the full, final, typeset and author-corrected version of record of the manuscript is available on our site with no access controls, subscription charges or pay-per-view fees (<http://bmjopen.bmj.com>).

If you have any questions on BMJ Open's open peer review process please email [info.bmjopen@bmj.com](mailto:info.bmjopen@bmj.com)

# BMJ Open

## Characterizing Associations of Exercise and Pain Patterns in Endometriosis via Mobile Self-Tracking

|                               |                                                                                                                                                                                                                                                                                                                                                                  |
|-------------------------------|------------------------------------------------------------------------------------------------------------------------------------------------------------------------------------------------------------------------------------------------------------------------------------------------------------------------------------------------------------------|
| Journal:                      | <i>BMJ Open</i>                                                                                                                                                                                                                                                                                                                                                  |
| Manuscript ID                 | bmjopen-2021-059280                                                                                                                                                                                                                                                                                                                                              |
| Article Type:                 | Original research                                                                                                                                                                                                                                                                                                                                                |
| Date Submitted by the Author: | 27-Nov-2021                                                                                                                                                                                                                                                                                                                                                      |
| Complete List of Authors:     | Ensari, Ipek; Columbia University, Data Science Institute<br>Lipsky-Gorman, Sharon; Columbia University, Department of Biomedical Informatics<br>Horan, Emma; Columbia University, Department of Biomedical Informatics<br>Bakken, Suzanne; Columbia University, School of Nursing<br>Elhadad, Noemie; Columbia University, Department of Biomedical Informatics |
| Keywords:                     | PAIN MANAGEMENT, Health informatics < BIOTECHNOLOGY & BIOINFORMATICS, PREVENTIVE MEDICINE, EPIDEMIOLOGY, COMPLEMENTARY MEDICINE                                                                                                                                                                                                                                  |
|                               |                                                                                                                                                                                                                                                                                                                                                                  |

SCHOLARONE™  
Manuscripts

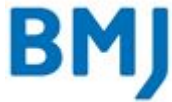

I, the Submitting Author has the right to grant and does grant on behalf of all authors of the Work (as defined in the below author licence), an exclusive licence and/or a non-exclusive licence for contributions from authors who are: i) UK Crown employees; ii) where BMJ has agreed a CC-BY licence shall apply, and/or iii) in accordance with the terms applicable for US Federal Government officers or employees acting as part of their official duties; on a worldwide, perpetual, irrevocable, royalty-free basis to BMJ Publishing Group Ltd ("BMJ") its licensees and where the relevant Journal is co-owned by BMJ to the co-owners of the Journal, to publish the Work in this journal and any other BMJ products and to exploit all rights, as set out in our [licence](#).

The Submitting Author accepts and understands that any supply made under these terms is made by BMJ to the Submitting Author unless you are acting as an employee on behalf of your employer or a postgraduate student of an affiliated institution which is paying any applicable article publishing charge ("APC") for Open Access articles. Where the Submitting Author wishes to make the Work available on an Open Access basis (and intends to pay the relevant APC), the terms of reuse of such Open Access shall be governed by a Creative Commons licence – details of these licences and which [Creative Commons](#) licence will apply to this Work are set out in our licence referred to above.

Other than as permitted in any relevant BMJ Author's Self Archiving Policies, I confirm this Work has not been accepted for publication elsewhere, is not being considered for publication elsewhere and does not duplicate material already published. I confirm all authors consent to publication of this Work and authorise the granting of this licence.

1  
2  
3 **Characterizing Associations of Exercise and Pain Patterns in Endometriosis via Mobile**  
4  
5 **Self-Tracking**  
6  
7

8  
9 Running title: Daily exercise and pain patterns in endometriosis  
10  
11  
12  
13  
14

15 Ipek Ensari<sup>1</sup>, PhD, Sharon Lipsky-Gorman<sup>2</sup>, MA, Emma Horan<sup>2</sup>, BS, Suzanne R. Bakken<sup>3</sup>, PhD,  
16  
17  
18 FAAN, Noémie Elhadad<sup>2</sup>, PhD  
19

20 <sup>1</sup>Data Science Institute, Columbia University, <sup>2</sup>Department of Biomedical Informatics, Columbia  
21  
22 University Irving Medical Center, <sup>3</sup>Columbia University School of Nursing, New York, NY  
23  
24  
25  
26  
27  
28  
29

30  
31 **Author of Correspondence:**

32 Ipek Ensari  
33 Columbia University  
34 Data Science Institute  
35 475 Riverside Dr, Room 320,  
36 New York, NY 10115  
37 Email:ie2145@columbia.edu  
38  
39  
40  
41  
42  
43  
44  
45  
46  
47  
48  
49  
50  
51  
52  
53  
54  
55  
56  
57  
58  
59  
60

**Word count:** 4,601

## Abstract

**Objectives:** This study investigates the association of exercise to pain at the day level in endometriosis, an inflammatory chronic pain condition that is currently inadequately managed and could benefit from exercise as a component of its effective management. **Setting:** A participatory research-based smartphone app (Phendo) designed for tracking symptoms and self-management of endometriosis. **Participants:** Study sample included 90,382 days of data from 1,009 Phendo research participants (~85% non-Hispanic white) with self-reported endometriosis living across 38 countries. **Primary Outcome Measures:** 1) Daily pain score that includes its intensity and location, 2) Change in pain score from previous day. **Design:** This was an observational, retrospective study. Pain outcomes were estimated from previous-day exercise and pain symptoms in separate, covariate-adjusted linear mixed-level models. **Results:** The association of previous-day exercise to pain outcomes was moderated by habitual exercise levels, independent of type of endometriosis diagnosis or body mass index (Rate ratio=0.96, 95% CI=0.95, 0.98, p=0.0007 for pain score outcome, B=-0.14, 95%CI=-0.26, -0.016, p=0.026 for pain difference). The habitual exercise level at which previous-day exercise started to be associated with favorable pain outcomes was ~3 times per week. Walking, yoga and stretching type activities were the most frequently reported modalities. **Conclusions:** To accrue the benefits of exercise for adequate endometriosis pain management at the day level, exercise might first need to be developed as a habit. A better understanding of the relationship between exercise behavior and endometriosis pain can be a starting point for identifying optimum points of intervention for informing the design of future exercise-based interventions for endometriosis pain management. These findings can inform exercise recommendations for endometriosis pain

1  
2  
3 management, specifically for targeting those who are at greater risk for sedentary behavior due to  
4  
5 acute exacerbations in their pain after exercise.  
6  
7  
8  
9  
10  
11  
12  
13  
14  
15  
16  
17  
18  
19  
20  
21  
22  
23  
24  
25  
26  
27  
28  
29  
30  
31  
32  
33  
34  
35  
36  
37  
38  
39  
40  
41  
42  
43  
44  
45  
46  
47  
48  
49  
50  
51  
52  
53  
54  
55  
56  
57  
58  
59  
60

For peer review only

### Strengths and limitations of this study

- This study leveraged a mHealth-based design and participatory research to investigate daily exercise and pain symptom patterns in endometriosis under ecologically-valid conditions.
- The participant sample (N=1,009) represents 38 countries around the world, ages across the reproductive life span, and various socio-demographic conditions.
- The study is limited to self-report binary measure of exercise and did not have sufficient details on duration or intensity for inclusion in the analyses as potential moderators.
- Participants consisted of mostly white, non-Hispanic individuals and limited to somewhat consistent trackers, therefore results might not be generalizable to some demographic groups or less symptomatic endometriosis patients.

## INTRODUCTION

Exercise, a subset of physical activity (PA) that is planned, structured, repetitive, and intended to improve or maintain physical fitness, is an important component of effective pain management.[1, 2] Both chronic (e.g., habitual) and acute (e.g., single session) exercise have been indicated to reduce pain and pain sensitivity (i.e., exercise-induced hypoalgesia).[3-5] Its efficacy for pain management has been demonstrated in numerous chronic pain conditions,[1, 6-10] with some reporting clinically meaningful reductions in pain severity associated with a range of exercise regimens.[8, 11] However, pain-related responses to exercise appear to be variable in populations with chronic pain conditions.[4] Similarly, exacerbation of pain with exercise could pose a barrier to regular exercise in such individuals, thus increasing resistance to exercising, which in return can worsen pain, related disability, and risk for co-morbidities.[12-14] Investigation into the naturally-occurring pattern of pain symptoms associated to exercise behavior can help inform the design of exercise-based therapies for targeting disease-related pain symptoms.

One population that can benefit from such investigation are individuals with endometriosis. Endometriosis is a systemic, estrogen-dependent inflammatory condition with debilitating symptoms including chronic pelvic pain, pain with sexual intercourse (dyspareunia), painful urination (dysuria), ovulation pain,[15-19] and is the second leading indication for hysterectomy.[20] There is substantial between-patient variation in its clinical manifestations,[17, 21] and a  $\sim 6.7(\pm 6.3)$  year-delay between symptom onset and its diagnosis[22]. It significantly impacts daily function and quality of life (QoL)[23, 24], contributing to a productivity loss of 6.3 hours/week[25] and an estimated \$69.4 billion per year in excess health expenditures in the United States.[26] Despite its prevalence rate of 10% among



1  
2  
3 women of reproductive age,[17] endometriosis is still poorly understood[17, 21] and not well-  
4 studied,[27] with no cure. Existing medical and hormonal therapies have limited efficacy, often  
5 confounded by side effects.[28] Opioids and other analgesics are commonly prescribed to  
6 endometriosis patients[29, 30] despite lack of evidence for sufficient efficacy of their long-term  
7 use and serious side effects,[31, 32] as well as Centers for Disease Control and Prevention  
8 (CDC) guidelines recommending nonpharmacologic therapies, including PA.[31] These findings  
9 underscore the critical need to identify alternative approaches for endometriosis pain  
10 management.  
11  
12  
13  
14  
15  
16  
17  
18  
19  
20

21 One such approach is exercise, based on various mechanisms proposed in the  
22 literature[33] that might pertain to endometriosis. These include regulation of the serotonergic  
23 and opioid receptors,[34] reduction of inflammatory markers associated with pain,[35, 36] and  
24 exercise's effects on nerve growth factor expression that is associated with the painful  
25 endometriosis lesions.[37, 38] Exercise can increase pain management self-efficacy, a factor  
26 linked to improved pain outcomes and QoL in chronic pain.[39] While the evidence on exercise  
27 for pain management is promising [8, 40, 41], existing data are scarce, cross-sectional, and  
28 indicate variable effects.[41-45] There further is precedence to investigate whether habitual  
29 exercise frequency might moderate the association of acute exercise to pain symptoms. This is  
30 based on reported exercise-induced adaptations (i.e., habituation) to pain stimuli through  
31 increased pain threshold via involvement of the opioid system.[46, 47] Pain-related activation in  
32 the brain's descending antinociceptive pathway has been demonstrated among regular exercisers,  
33 with corresponding reductions in self-reported pain after acute bouts of at least moderate  
34 intensity exercise.[48] Moreover, habitual exercise levels have been indicated to moderate a  
35 variety of self-reported outcomes (e.g., mood, anxiety, fatigue) in response to acute exercise.[49-  
36  
37  
38  
39  
40  
41  
42  
43  
44  
45  
46  
47  
48  
49  
50  
51  
52  
53  
54  
55  
56  
57  
58  
59  
60

1  
2  
3 51] While these findings are promising, their generalizability are limited by sample  
4  
5 characteristics and laboratory-based experimental pain stimuli and exercise manipulations, and  
6  
7 measurement duration. These collectively warrant further investigation into better understanding  
8  
9 this relationship at a more granular level with a representative sample, under ecologically valid  
10  
11 conditions, while accounting for possible between-individual variability.  
12  
13  
14

15 Accordingly, this study investigates the association of exercise behavior to self-reported  
16  
17 daily pain symptoms in endometriosis. We leverage mobile self-tracking, a particularly useful  
18  
19 approach for capturing ecologically valid profiles of the dynamic temporal fluctuations and  
20  
21 between-individual variability in pain over time.[52] We primarily aim to assess whether level  
22  
23 of habitual exercise moderates the association of daily exercise to subsequent pain symptoms in  
24  
25 endometriosis. Given the previously documented variable course of pain symptomology in  
26  
27 endometriosis,[53] we also delineate the variability in day-to-day pain experiences within these  
28  
29 analyses.  
30  
31  
32  
33  
34  
35

## 36 MATERIALS AND METHODS

37  
38 Study design and protocols were approved by the Columbia University Irving Medical  
39  
40 Center (CUIMC) Institutional Review Board (#AAAQ9812). This was an observational study  
41  
42 conducted with retrospective data collected through a research-based smartphone self-tracking  
43  
44 app designed and developed for tracking and documenting endometriosis and its self-  
45  
46 management.  
47  
48  
49

### 50 Study Setting: Phendo

51  
52 Phendo is an observational research app available for iOS<sup>1</sup> and Android<sup>2</sup> for free in App  
53  
54 stores. Phendo was designed using participatory design through a series of qualitative and  
55  
56  
57  
58  
59  
60

1  
2  
3 quantitative studies with endometriosis patients, [54, 55] with the goal of creating a patient-  
4 centered tool that engages the user as an active participant in the research on better  
5 understanding endometriosis.[56] As such, users of Phendo self-track as a form of participatory  
6 research, to contribute to creation of better documentation of the patient disease experience.[54,  
7  
8  
9  
10  
11  
12 57]

### 13 14 **Informed Consent**

15  
16  
17 Upon downloading Phendo and prior to starting to contribute their data, all participants  
18 are provided with an explanation of the App, purpose of the study (citizenendo.org), and provide  
19 formal electronic informed consent (and ascent for individuals 13-18 years old) (See  
20  
21  
22  
23  
24  
25  
26  
27  
28  
29  
30  
31  
32  
33  
34  
35  
36  
37  
38  
39  
40  
41  
42  
43  
44  
45  
46  
47  
48  
49  
50  
51  
52  
53  
54  
55  
56  
57  
58  
59  
60  
Supplementary Figures 1-2 for example screenshots). Participants are instructed to track daily,  
but they are free to track as much or as sporadically as they wish, and they do not receive any  
prompts or requests to track a specific variable from the research team. Findings from a previous  
study evaluating recruitment and retention patterns within Phendo and across seven other  
research self-tracking apps for other diseases indicated that Phendo's engagement was on-par  
with standard engagement patterns in research smartphone apps.[58]

### 37 38 **Study Sample**

39  
40  
41  
42  
43  
44  
45  
46  
47  
48  
49  
50  
51  
52  
53  
54  
55  
56  
57  
58  
59  
60  
The study sample consisted of Phendo participants who reported an endometriosis  
diagnosis and had data on their daily exercise and pain. Endometriosis diagnosis in Phendo is  
determined based on participant response to the eligibility criteria item "Diagnosis: Do you have  
endometriosis?" with four possible options: "Yes, I was diagnosed as a result of surgery", "Yes, I  
was diagnosed by a medical professional without surgery", "I think I have endometriosis (know  
the symptoms/no doctor)", or "No". We a priori decided to include all participants who selected  
one of the three affirmative responses in the present analyses.

## Patient and public involvement

Study measures in Phendo were previously developed through qualitative and quantitative studies (see [54, 57]) with participants with endometriosis, based on their habits, preferences, and needs for disease-specific symptom and activity tracking. This patient-centered participatory design technique is recommended for developing patient-reported outcome measures.[59-61] It has been suggested to enhance content validity[62], relevance to the target demographic and thus adherence to App use,[63, 64] therefore providing a more comprehensive and accurate representation of the relevant disease dimensions.[60]

*Outcome Measures.* Day-level pain was assessed through the following multiple-choice items within Phendo to capture all possible pain-related responses: 1. “Are you in pain now? Where is the pain?”, and 2. “Any gastrointestinal or urinary issues?”. For each item, severity was assessed using the item “How severe is the symptom?” with 3 options of mild, moderate, or severe. For the first item, the pain locations from which participants can select cover all areas of the body and organs (20 available choices, as well as right/left and upper/middle/lower specification), and can be mapped onto a visual analogous to the McGill Pain Scale.[65] The second item captures painful urination (dysuria), painful bowel movement (dyschezia). The severity question measures intensity on a 3-point categorical scale (mild, moderate, or severe), analogous to other commonly used pain rating scales in the literature.[66, 67] This discretization has been used for standardization and comparisons across different pain measures, demonstrated to better capture the nonlinear relationship between reported pain severity and interference with activity than by the use of numbers,[68] and circumvent the user-reported challenges of number-based intensity scales with respect to their range.[69]

1  
2  
3 While similar mHealth pain measurement approaches have been investigated for their  
4 validity, utility and specificity for various pain conditions[63, 69, 70], a standard “all-in-one”  
5 single outcome that captures the multi-dimensional pain experience across different populations  
6 remains to be established.[71, 72] To circumvent these issues, composite pain computations have  
7 been proposed.[73] We similarly computed a composite day-level pain score to capture  
8 participants’ conceptualization of their pain experience based on area and severity.[53] It is  
9 computed heuristically by adding the severity scores reported for each body area (e.g., moderate  
10 pain in abdomen, mild pains in chest and leg would yield  $2+1+1=4$  as the total score). To  
11 account for and circumvent any potential pain rumination/catastrophizing [72, 74] and varying  
12 tracking habits among participants, the score was computed based on the unique reports of area-  
13 severity pairs per day for each participant (e.g., if a participant tracked mild abdominal pain three  
14 times in a day, this abdomen-mild pair is counted toward the daily pain score only once). This  
15 outcome measure was evaluated using two approaches in the analyses: 1) total pain score for the  
16 day, and 2) difference in this total score from previous day to the next (i.e.,  $t-(t-1)$ ). The second  
17 approach captures additional nuances in the data, enabling to distinguish between those with  
18 overall high pain scores over time and might experience a post-exercise reduction in pain versus  
19 those with low pain scores and does not experience a post-exercise reduction in pain.  
20  
21  
22  
23  
24  
25  
26  
27  
28  
29  
30  
31  
32  
33  
34  
35  
36  
37  
38  
39  
40  
41  
42  
43

44 *Daily and habitual exercise.* Exercise is tracked at the day level within the Phendo App with a  
45 binary (Yes/No) response to the root question “Did you exercise today?”. Users can further  
46 customize their exercise tracking within their user profile, which are then saved for future  
47 tracking. This customizable item allows unrestricted free-text response, thus responses are highly  
48 variable. We relied on the root question to assess exercise at the day level and to compute weekly  
49  
50  
51  
52  
53  
54  
55  
56  
57  
58  
59  
60

1  
2  
3 exercise frequencies, and used the free-text entries to validate that the entries were exercise-  
4 related. This day-level assessment aims to increase ecological validity[59, 75] and reduce the  
5 likelihood of low test-retest reliability and inaccuracy due to recall bias.[76] Similar mHealth  
6 measures of daily PA and exercise have been used by others[77-79] who reported estimates in  
7 concordance with those from accelerometers,[80] showing higher correlations than do traditional  
8 self-report methods.[77, 78] Finally, our preliminary data (unpublished work) based on a sample  
9 of 30 Phendo users over the course of 14 days indicated significant associations (log odds  
10 ratio=1.44,  $z=3.00$ ,  $p=0.002$ ) of the Phendo exercise item responses to objectively-estimated and  
11 self-reported exercise levels.  
12  
13  
14  
15  
16  
17  
18  
19  
20  
21  
22  
23  
24  
25

## 26 **Data Analysis**

27  
28 *Sample Characteristics.* We provide frequencies (%) and means (standard deviation; SD) for  
29 describing the study sample demographics. We characterize pain symptomology in the sample  
30 by describing the prevalence of pain severities by each body area.  
31  
32  
33  
34  
35  
36  
37

38 *Day-level associations of pain to exercise.* We investigated the association of previous-day  
39 exercise to pain outcomes and the moderation of this association by habitual exercise levels  
40 using generalized linear mixed models (GLMMs). We estimated separate models predicting day-  
41 level total pain score and pain score difference. Both outcomes were regressed on previous-day  
42 exercise, habitual exercise levels, and their interaction to estimate the slope of average day-level  
43 pain and change in pain for each habitual exercise level. Participant as a random effect was  
44 included to account for between-person variability in daily pain by estimating a separate  
45  
46  
47  
48  
49  
50  
51  
52  
53  
54  
55  
56  
57  
58  
59  
60

1  
2  
3 intercept for each participant. Models were further adjusted for menstrual status(binary: yes/no),  
4  
5 previous-day pain, body mass index (BMI) and education level.  
6

7  
8 Assessment of lagged-day effects (i.e., association of pain day  $t$  to exercise on day  $t-1$ )  
9  
10 are motivated by 2 factors. First, this was necessary to ensure temporal sequence of the actual  
11  
12 exercise and pain experienced by the participant. The App allows tracking of momentary pain  
13  
14 through multiple daily entries, but allows tracking of exercise once a day. As such even if the  
15  
16 participant exercises at multiple time points throughout the day, they are tracked together in a  
17  
18 single daily entry. Second, though there is a plethora of literature on the acute exercise effects on  
19  
20 a variety of health and disease outcomes (e.g., [81, 82]), studies are limited to measurements up  
21  
22 to several hours. Investigation of an association between disease outcomes and previous-day  
23  
24 exercise provides an opportunity to delineate possible sustained or lagged exercise effects.  
25  
26  
27

28  
29 Missing values in the variables were imputed as described in Supplementary File 1 (See  
30  
31 Supplementary Table 1 and Supplementary Figures 3-5) and checked for appropriateness based  
32  
33 on convergence and marginal distributions following guidelines.[83-85] We used a zero-inflated  
34  
35 negative binomial (ZINB) distribution when modeling the total pain outcome, as it has been  
36  
37 demonstrated to provide the best fit for outcomes with over-dispersion and zero-inflation,[86-88]  
38  
39 as was the case for this variable. ZINB models consider two sources of zero observations:  
40  
41 “sampling zeros” that are part of the underlying sampling distribution (i.e., negative binomial)  
42  
43 and “structural zeros” that cannot score anything other than zero (i.e., participant did not  
44  
45 track).[86] This virtue of the ZINB models allows for specification of the imputed zeros and  
46  
47 prevents the risk of over-estimating effects and generates more conservative estimates for  
48  
49 predictors of interest by estimating a separate zero-inflation term, as well as conditional  
50  
51 model.[86] Given on our data inclusion approach (i.e., days with missing pain by default have a  
52  
53  
54  
55  
56  
57  
58  
59  
60

1  
2  
3 tracked exercise or menstrual status response), we specified the zero-inflation term such that it  
4 was dependent on the exercise variable for the day, as well as assuming an overall general zero-  
5 inflation structure in the outcome through inclusion of an intercept, based on  
6  
7  
8  
9  
10 recommendations.[88] Menstrual status was not a significant predictor of zero inflation and  
11  
12 therefore removed from the zero-inflation term during the modeling process. We included  
13  
14 participants who had at least 11 pairs of consecutive days of data in the final analytic sample as  
15  
16 this provided sufficient amount of data to 1) ensure model convergence and improve reliability  
17  
18 and accuracy of the estimates, particularly the random effects and their variances[89-92], and 2)  
19  
20 adequately infer participants' habitual exercise level by considering at least three weeks' worth  
21  
22 of tracking to compute the weekly exercise frequency. All data analyses were conducted using  
23  
24 R[93] and the glmmTMB package was used for the GLMMs.[87, 88]  
25  
26  
27  
28  
29  
30

## 31 RESULTS

32  
33 *Sample Descriptive Characteristics.* Out of the initial eligible pool of 9,792 Phendo users with  
34  
35 reported endometriosis, 7,949 had at least one day of tracking of the variables of interest for the  
36  
37 study. Of these, 1,009 users had at least 11 pairs of consecutive days of data available on these  
38  
39 variables and thus were included in the data analyses for the study. Sample characteristics are  
40  
41 provided in Table 1. Participants had on average 89.6 days of data available for analysis  
42  
43 (SD=62.8, Range=22-841, IQR=31). Tracked data span from November 2016 to April 2020.  
44  
45 Participants collectively represent 38 countries around the world, with a wide age range (14-63  
46  
47 years), and varying education and employment status (See Table 1). Among participants,  
48  
49 702(69.5%) had laparoscopic confirmation of their diagnosis, 200(19.8%) had a clinician  
50  
51  
52  
53  
54  
55  
56  
57  
58  
59  
60



1  
2  
3 diagnosis, and 107 (10.6%) had suspected endometriosis (i.e., “I think I have endometriosis  
4 (know the symptoms, no doctor”).

5  
6  
7  
8 *Description of pain symptomology.* Mean daily pain score was 4.48 (SD=7.11, 0-79). Mean  
9  
10 person-level daily pain score (i.e., “mean of means”) was 4.82 (SD=4.57, Range=0-34). Figure 1  
11  
12 depicts the prevalence of each pain severity per body area. Moderate intensity was the most  
13  
14 frequently reported severity across all body areas (Mean=49.3%, SD=22.2), and pelvic pain was  
15  
16 the most prevalent area, followed by back pain and gastrointestinal pain (See Figure 1).  
17  
18

19  
20 Mean weekly exercise frequency was 1.43/week (SD=1.54, Range=0-6.87/week,  
21  
22 IQR=2.21), 21.3% (N=215) of the sample had an exercise frequency of at least three times per  
23  
24 week, and ~38.5% (388) of the sample did not engage in any regular exercise (i.e., <1/week).  
25  
26 Consequently, ~40.2% (N=406) of the sample had an exercise frequency of 1-2 times per week.  
27  
28 Prevalence of the 10 most frequently reported exercise modalities in the sample are depicted in  
29  
30 Figure 2. Walking was the most common modality, reported by 50.94 % of the participants,  
31  
32 followed by yoga (30.82%), and muscle strength/endurance training activities (24.38%). Yoga  
33  
34 and stretching exercises were collectively reported by ~45% of the sample.  
35  
36

37  
38 *Association of day-level pain to exercise.* Results of the GLMMs estimating day-level total pain  
39  
40 score and difference are provided in Tables 2 and 3. Adequacy of imputations for valid statistical  
41  
42 inference were verified based on the recommended measures of missing data information of  
43  
44 *fraction of missing information* ( $\lambda$ ) and *relative increase in variance due to nonresponse* ( $r$ )[94,  
45  
46 95] (See Supplemental File 2). Coefficients for the model interaction terms indicated a small but  
47  
48 statistically significant moderation of previous-day exercise by habitual exercise levels (RR=0.96  
49  
50 for total pain score and -0.14 for pain score difference,  $p<0.05$ ; See Figure 3). Participants with  
51  
52 more frequent habitual exercise levels were more likely to report lower pain score and smaller  
53  
54  
55  
56  
57  
58  
59  
60

1  
2  
3 increases (or larger decreases) in pain the day after an exercise bout, compared to not having  
4 exercised the previous day. On the other hand, sedentary or less active individuals were more  
5 likely to report higher levels of pain and larger increases (or smaller decreases) in pain 1 day  
6 after an exercise bout compared to not having exercised the day before (See Table 1). Further  
7 inspection of this interaction indicated ~3 times/week of habitual exercise as the point after  
8 which previous day exercise began to be associated with favorable pain outcomes (e.g., a  
9 decrease from the predicted mean score) on the following day, adjusted for other day-level and  
10 person-level factors (Figure 3). There was substantial between-person variability in average day-  
11 level pain scores, based on the statistically significant random effect of participant in the models  
12 (See Tables 2 and 3, also depicted in Figure 4). The significance of this random effect can further  
13 be quantified through a restricted likelihood ratio test (RLRT) based on simulations from the  
14 model sample distribution, [96, 97] yielding an observed likelihood ratio (RLRT =7183.3, p-  
15 value < 0.0001). These collectively indicate substantial between-individual variability in daily  
16 pain experience contributing to the total model pain variance.

17  
18  
19 *Post-hoc analyses.* In a post-hoc analysis, we tested the possible influence of type of  
20 endometriosis diagnosis by including this categorical variable in the 2 models described above.  
21 Results indicated that diagnosis type did not have an influence on the results and were not  
22 significant predictors based on the non-significant B coefficients (p=0.48 and p=0.59 for pain  
23 score and p=0.70 and p=0.27 for difference in pain score) and that there were no differences  
24 across the 3 groups with respect to either daily total pain score or difference ( $\chi^2 = 1415.1$ , df =  
25 1438, p-value = 0.661) (See Supplementary Tables 2 and 3 for full results).

## DISCUSSION

1  
2  
3           Leveraging mobile tracking to analyze 90,382 days of data from 1,009 women with  
4  
5 endometriosis, this study investigated the association of exercise behavior to fluctuations in pain  
6  
7 at the day level. In our analyses, the association of previous-day exercise to subsequent pain was  
8  
9 moderated by habitual exercise levels. This effect was consistent across individuals independent  
10  
11 of type of endometriosis diagnosis or BMI. There further was substantial between-person  
12  
13 heterogeneity in naturally fluctuating pain patterns. To our knowledge, this is the first study to  
14  
15 assess the association of day-level and habitual exercise to pain symptoms in endometriosis, and  
16  
17 quantify the between-person heterogeneity in the natural fluctuations in pain in this population  
18  
19 using a large sample of women around the world.  
20  
21  
22

23  
24           Moderation of the association of previous-day exercise to pain by habitual exercise levels  
25  
26 suggest that, exercise behavior might first need to be developed as a sustained behavior (i.e.,  
27  
28 habit) to experience favorable pain outcomes associated with day-level exercise. Specifically,  
29  
30 previous-day exercise was associated with more favorable pain outcomes when habitual exercise  
31  
32 level reached 3/week in our sample. This is in line with the national PA guidelines [98], which  
33  
34 recommend aerobic exercise at least 3/week and muscle-strengthening exercise at least  
35  
36 2/week.[99] However, there are no specific recommendations for endometriosis in the current  
37  
38 guidelines; and systematic reviews recommend “overall, general exercise” without further details  
39  
40 due to lack adequate research on the optimal dose of exercise for endometriosis pain.[8, 44] Our  
41  
42 findings provide preliminary evidence for informing exercise recommendations for  
43  
44 endometriosis pain management, specifically for targeting those who are at greater risk for  
45  
46 sedentary behavior due to acute exacerbations in their pain after exercise.  
47  
48  
49  
50

51           Our findings on pain in pelvis and of moderate severity as the most frequently reported  
52  
53 pain aspects are in line with those from others on endometriosis[100] and various chronic pain  
54  
55  
56  
57  
58  
59  
60

1  
2  
3 conditions.[101, 102] The distribution of the total daily pain scores was right-skewed (i.e.,  
4  
5 extreme scores on the higher ends of the range) with a mean score that was on the lower end of  
6  
7 the range. This could partly be due to the data collection method which includes not just days  
8  
9 where the participant experienced pain but also days without pain. Indeed, our participants on  
10  
11 average did not report or experience any pain 6.25% of the time. In contrast, traditional study  
12  
13 designs typically rely on recall of past pain experience aggregated over a period of time (e.g.,  
14  
15 past week, month) and ask the participant to report their average or highest pain severity over  
16  
17 this period.[103, 104] Such recall-based techniques are prone to peak-and-end effects,[105] and  
18  
19 catastrophizing or other similar biases.[104, 106] Recruitment from clinical referral points is a  
20  
21 common practice, and such patients are typically at the more disabled end of the spectrum. This  
22  
23 has been attributed to higher normative scores in the literature,[103] as opposed to more even  
24  
25 distributions of pain symptomology among community-based samples.[107] Self-tracking  
26  
27 facilitates documentation of not only severe pain, but also mild, moderate, and no pain instances,  
28  
29 therefore enabling a more realistic representation of the pain experience as it dynamically  
30  
31 unfolds over time. This can reduce the likelihood of over-representing severe cases, which is a  
32  
33 potential limitation attributed to data collected at point of contact in clinical settings.[23]  
34  
35 However, it is difficult to make direct comparisons with other studies given the different pain  
36  
37 measures, warranting further research.  
38  
39  
40  
41  
42  
43

44  
45 The mean weekly exercise frequency was 1.43/week (SD=1.57, IQR=2.29) in the sample,  
46  
47 with only 24.5 % (N=202) of the sample engaging in exercise at least three times a week. This  
48  
49 suggests that individuals with endometriosis might be at increased risk for sedentary behavior or  
50  
51 insufficient PA to meet the recommendations.[98, 99] Physical inactivity and sedentary behavior  
52  
53 are risk factors for various comorbidities,[108] and have been linked to exacerbation of pain in  
54  
55  
56  
57  
58  
59  
60

1  
2  
3 chronic pain populations.[109, 110] These collectively underscore the need to focus efforts on  
4 promoting regular physical activity in women with endometriosis. Though we did not analyze  
5 intensity, type or duration as potential model moderators, our findings suggest that there is a  
6 wide range of modalities preferred by this population, and that both aerobic and muscle  
7 strengthening and endurance type activities might be helpful. These modalities represent both  
8 lower and higher intensity ranges (e.g., yoga vs running/cycling), suggesting that responses to  
9 the exercise intensity might differ across individuals. Yoga and stretching were reported by  
10 almost half of the sample, which could indicate participants use these approaches for pain relief,  
11 in line with a previous study reporting efficacy of hatha yoga.[41] A Cochrane review concluded  
12 that exercise of ~50 minutes/session and at least three times per week may provide clinically  
13 significant reductions in menstrual pain regardless of the intensity.[8] However, authors noted  
14 the low quality of the existing evidence and a need for studies with larger, more diverse samples  
15 and appropriate control conditions.  
16  
17  
18  
19  
20  
21  
22  
23  
24  
25  
26  
27  
28  
29  
30  
31  
32

33 Endometriosis patients are significantly more likely to have higher all-cause healthcare  
34 utilization and direct health care costs than controls, including twice the prevalence of opioid  
35 prescriptions for pain management (e.g., 77.2% vs 40% for endometriosis patients vs controls  
36 reported in one claims-based study),[30] and for prolonged durations (i.e., >90 days).[29] This is  
37 not recommended [33] as long-term use of opioids does not provide sufficient efficacy, and is  
38 associated with accidental overdose,[111] side effects such as gastrointestinal dysfunction,[31]  
39 and a paradoxical worsening of pain over time.[112] Exercise can further promote patient  
40 engagement, a recommended yet under-implemented component in chronic pain  
41 management[113] that can improve treatment adherence and outcomes. In line with our findings,  
42 substantial between-individual variability in exercise effects have been reported in the  
43  
44  
45  
46  
47  
48  
49  
50  
51  
52  
53  
54  
55  
56  
57  
58  
59  
60

1  
2  
3 literature.[41-44, 114] This can be targeted through individualized exercise prescriptions,[33,  
4  
5 115] providing evidence for undertaking a precision approach for self-management in  
6  
7 endometriosis. Various individualization approaches have been investigated (e.g., adaptive  
8  
9 treatment strategies,[116] micro-randomized trials,[117] just-in-time adaptive interventions  
10  
11 [118]) for intervening on health behaviors and outcomes, including PA. [9, 117] It would be  
12  
13 opportune to implement a similar N-of-1 intervention approach for identifying person-specific  
14  
15 optimal “dose” of exercise based on its parameters (i.e., intensity, type, duration, frequency) to  
16  
17 target endometriosis pain symptoms.  
18  
19

20  
21 Another novel finding in our study was the lack of a difference in the pain experience, or  
22  
23 in the association of previous day exercise and habitual exercise to subsequent pain outcomes  
24  
25 between those with a formal- versus self-diagnosis of endometriosis. Endometriosis is difficult to  
26  
27 diagnose, with a ~7.6 year delay with symptom onset and its surgical diagnosis.[26, 119, 120]  
28  
29 Endometriosis patients further face insurance-related challenges in accessing healthcare for their  
30  
31 condition.[16, 121] The participants without a formal diagnosis might have sought medical care  
32  
33 for their symptoms but not received the needed care (e.g., diagnostic testing, referral to a  
34  
35 specialist), or that their diagnostic tests results were false negative,[119] or alternatively did not  
36  
37 have adequate access to healthcare. We refrain from making a conclusive remark, nevertheless;  
38  
39 this finding underscores the need for further research in endometriosis conducted in diverse  
40  
41 samples including possibly those self-report having endometriosis symptoms, instead of limiting  
42  
43 to patients with a physician referral or simply relying on secondary data sources (e.g., electronic  
44  
45 health records, claims databases).  
46  
47  
48  
49

50  
51 We acknowledge several limitations of this study. First, we used a self-report binary  
52  
53 measure of exercise in our analyses and did not have sufficient details on duration or intensity for  
54  
55  
56  
57  
58  
59

1  
2  
3 inclusion in the analyses as potential moderators. Similarly, the composite pain score has not  
4  
5 been compared against existing standard pain measures in the literature for its validity, which is  
6  
7 an area of investigation still under progress. Computation of a composite pain has been proposed  
8  
9 by others[73] as this circumvents numerous limitations in current pain assessment approaches,  
10  
11 including lack of a standard single outcome that can be used universally,[71] or a validated  
12  
13 instrument that can capture all the constructs of persistent pain.[122] Similarly, there is a lack of  
14  
15 endometriosis-specific pain measures for repeated assessment, and the categories of painful body  
16  
17 locations/functions in this study are further reflective of how they are conceptualized and  
18  
19 documented in traditional clinical records,[123] based on their mappings using standardized  
20  
21 medical terminology nomenclature.[124] We relied on self-reported values for weight and height  
22  
23 to compute BMI, which might have been under-estimated by some participants (e.g., those with  
24  
25 higher BMI[125, 126]). Next, our sample consisted primarily of White, non-Hispanic women.  
26  
27 Race/ethnicity was not significantly associated with average daily pain reports or exercise levels  
28  
29 in the sample, based on the  $\chi^2$  or Kruskal Wallis rank sum tests and therefore not included as a  
30  
31 covariate in the models. Nevertheless, future studies are warranted to assess chronic pain in  
32  
33 endometriosis measured over time across different racial/ethnic and socioeconomic groups.  
34  
35 Similarly, these results are limited to users of the Phendo App and relatively consistent trackers,  
36  
37 which might not be generalizable to those who do not actively track or monitor their diseases  
38  
39 symptoms due to mildness of their disease and/or lack of interest in mHealth use.

## 46 47 **Conclusion**

48  
49 In this study, we report habitual exercise levels as a potential moderator of the association  
50  
51 of previous day exercise to endometriosis pain, suggesting that to accrue the benefits of exercise  
52  
53 for adequate endometriosis pain management at the day level, exercise might first need to be  
54  
55  
56  
57  
58  
59

1  
2  
3 developed as a habit. While guidelines recommend prescribing exercise for management of pain  
4  
5 in clinical populations, endometriosis (or general chronic) pain-specific recommendations to  
6  
7 guide patients and providers on measurable parameters (time, type, intensity, and frequency) are  
8  
9 lacking. This warrants future studies investigating the effects of both acute and chronic exercise  
10  
11 on endometriosis pain with a focus on various types, intensities and durations.  
12  
13  
14  
15

### 16 17 **Author Contributions**

18  
19 IE conceptualized the study, conducted the data analyses, and prepared the first draft of the  
20  
21 manuscript. SLG and ENH were responsible for data acquisition, curation and management. NE  
22  
23 acquired the funding and provided the mHealth infrastructure for the study (Phendo App). NE  
24  
25 and SB provided guidance on the study design and data analyses. SB, NE, SLG and ENH  
26  
27 reviewed and provided feedback on the the manuscript.  
28  
29  
30  
31  
32

### 33 **Funding**

34  
35 Funding for the work is provided by a postdoctoral fellowship from the Data Science Institute at  
36  
37 Columbia University and an award from the National Library of Medicine (R01 LM013043). We  
38  
39 are grateful to the Phendo participants.  
40  
41  
42  
43

### 44 **Competing Interests**

45  
46 All authors report no conflicts of interest.  
47  
48  
49  
50

### 51 **Data availability statement**

52  
53 Data are available on reasonable request.  
54  
55  
56  
57  
58  
59  
60



1. Available at <https://itunes.apple.com/us/app/phendo/id1145512423>
2. Available at <https://play.google.com/store/apps/details?id=com.appliedinformaticsinc.phendo>

## References

1. Ambrose KR, Golightly YM. Physical exercise as non-pharmacological treatment of chronic pain: Why and when. *Best Pract Res Clin Rheumatol*. 2015;29(1):120-30. Epub 2015/05/23. doi: 10.1016/j.berh.2015.04.022. PubMed PMID: 26267006.
2. Rice D, Nijs J, Kosek E, Wideman T, Hasenbring MI, Koltyn K, et al. Exercise-Induced Hypoalgesia in Pain-Free and Chronic Pain Populations: State of the Art and Future Directions. *The Journal of Pain*. 2019;20(11):1249-66. doi: <https://doi.org/10.1016/j.jpain.2019.03.005>.
3. Héroux M, Watt M, McGuire KA, Berardi JM. A personalized, multi-platform nutrition, exercise, and lifestyle coaching program: A pilot in women. *Internet Interventions*. 2017;7:16-22. doi: <https://doi.org/10.1016/j.invent.2016.12.002>.
4. Geneen LJ, Moore RA, Clarke C, Martin D, Colvin LA, Smith BH. Physical activity and exercise for chronic pain in adults: an overview of Cochrane Reviews. *Cochrane Database of Systematic Reviews*. 2017;(4).
5. Ambrose KR, Golightly YM. Physical exercise as non-pharmacological treatment of chronic pain: why and when. *Best practice & research Clinical rheumatology*. 2015;29(1):120-30.
6. Lockett D-MC, Campbell JF. The Effects of Aerobic Exercise on Migraine. *Headache: The Journal of Head and Face Pain*. 1992;32(1):50-4. doi: <https://doi.org/10.1111/j.1526-4610.1992.hed3201050.x>.
7. Lemmens J, De Pauw J, Van Soom T, Michiels S, Versijpt J, van Breda E, et al. The effect of aerobic exercise on the number of migraine days, duration and pain intensity in migraine: a systematic literature review and meta-analysis. *J Headache Pain*. 2019;20(1):16. Epub 2019/02/16. doi: 10.1186/s10194-019-0961-8. PubMed PMID: 30764753; PubMed Central PMCID: PMC6734345.
8. Armour M, Ee CC, Naidoo D, Ayati Z, Chalmers KJ, Steel KA, et al. Exercise for dysmenorrhoea. *Cochrane Database of Systematic Reviews*. 2019;(9). doi: 10.1002/14651858.CD004142.pub4. PubMed PMID: CD004142.
9. Rabbi M, Aung MS, Gay G, Reid MC, Choudhury T. Feasibility and acceptability of mobile phone-based auto-personalized physical activity recommendations for chronic pain self-management: pilot study on adults. *Journal of medical Internet research*. 2018;20(10):e10147.
10. Sevel L, Boissoneault J, Alappattu M, Bishop M, Robinson M. Training endogenous pain modulation: a preliminary investigation of neural adaptation following repeated exposure to clinically-relevant pain. *Brain Imaging and Behavior*. 2020;14(3):881-96. doi: 10.1007/s11682-018-0033-8.
11. Gordon R, Bloxham S, editors. A systematic review of the effects of exercise and physical activity on non-specific chronic low back pain. *Healthcare*; 2016: Multidisciplinary Digital Publishing Institute.
12. Zhang R, Chomistek AK, Dimitrakoff JD, Giovannucci EL, Willett WC, Rosner BA, et al. Physical activity and chronic prostatitis/chronic pelvic pain syndrome. *Med Sci Sports Exerc*. 2015;47(4):757-64. doi: 10.1249/MSS.0000000000000472. PubMed PMID: 25116086.

13. Pinto A, Di Raimondo D, Tuttolomondo A, Buttà C, Milio G, Licata G. Effects of physical exercise on inflammatory markers of atherosclerosis. *Current pharmaceutical design*. 2012;18(28):4326-49.
14. Garatachea N, Molinero O, Martínez-García R, Jimenez-Jimenez R, Gonzalez-Gallego J, Marquez S. Feelings of well being in elderly people: relationship to physical activity and physical function. *Archives of Gerontology and Geriatrics*. 2009;48(3):306-12.
15. Tamaresis JS, Irwin JC, Goldfien GA, Rabban JT, Burney RO, Nezhat C, et al. Molecular classification of endometriosis and disease stage using high-dimensional genomic data. *Endocrinology*. 2014;155(12):4986-99. Epub 2014/09/23. doi: 10.1210/en.2014-1490. PubMed PMID: 25243856; PubMed Central PMCID: PMC4239429.
16. Fourquet J, Gao X, Zavala D, Orengo JC, Abac S, Ruiz A, et al. Patients' report on how endometriosis affects health, work, and daily life. *Fertil Steril*. 2010;93(7):2424-8. doi: 10.1016/j.fertnstert.2009.09.017. PubMed PMID: 19926084.
17. Rogers PA, D'Hooghe TM, Fazleabas A, Gargett CE, Giudice LC, Montgomery GW, et al. Priorities for endometriosis research: recommendations from an international consensus workshop. *Reprod Sci*. 2009;16(4):335-46. Epub 2009/02/07. doi: 10.1177/1933719108330568. PubMed PMID: 19196878; PubMed Central PMCID: PMC3682634.
18. Schliep KC, Mumford SL, Peterson CM, Chen Z, Johnstone EB, Sharp HT, et al. Pain typology and incident endometriosis. *Hum Reprod*. 2015;30(10):2427-38. Epub 2015/08/11. doi: 10.1093/humrep/dev147. PubMed PMID: 26269529.
19. Fourquet J, Zavala DE, Missmer S, Bracero N, Romaguera J, Flores I. Disparities in healthcare services in women with endometriosis with public vs. private health insurance. *Am J Obstet Gynecol*. 2019. Epub 2019/06/22. doi: 10.1016/j.ajog.2019.06.020. PubMed PMID: 31226295.
20. Whiteman MK, Hillis SD, Jamieson DJ, Morrow B, Podgornik MN, Brett KM, et al. Inpatient hysterectomy surveillance in the United States, 2000-2004. *American journal of obstetrics and gynecology*. 2008;198(1):34. e1-. e7.
21. Garry R. The endometriosis syndromes: a clinical classification in the presence of aetiological confusion and therapeutic anarchy. *Human Reproduction*. 2004;19(4):760-8. doi: 10.1093/humrep/deh147.
22. Nnoaham KE, Hummelshoj L, Webster P, d'Hooghe T, de Cicco Nardone F, de Cicco Nardone C, et al. Impact of endometriosis on quality of life and work productivity: a multicenter study across ten countries. *Fertil Steril*. 2011;96(2):366-73 e8. Epub 2011/07/02. doi: 10.1016/j.fertnstert.2011.05.090. PubMed PMID: 21718982; PubMed Central PMCID: PMC3679489.
23. De Graaff A, D'hooghe T, Dunselman G, Dirksen C, Hummelshoj L, Consortium WE, et al. The significant effect of endometriosis on physical, mental and social wellbeing: results from an international cross-sectional survey. *Human reproduction*. 2013;28(10):2677-85.
24. Simoens S, Dunselman G, Dirksen C, Hummelshoj L, Bokor A, Brandes I, et al. The burden of endometriosis: costs and quality of life of women with endometriosis and treated in referral centres. *Human Reproduction*. 2012;27(5):1292-9.
25. Soliman AM, Coyne KS, Gries KS, Castelli-Haley J, Snabes MC, Surrey ES. The effect of endometriosis symptoms on absenteeism and presenteeism in the workplace and at home. *Journal of managed care & specialty pharmacy*. 2017;23(7):745-54.
26. Simoens S, Dunselman G, Dirksen C, Hummelshoj L, Bokor A, Brandes I, et al. The burden of endometriosis: costs and quality of life of women with endometriosis and treated in

- 1  
2  
3 referral centres. *Hum Reprod.* 2012;27(5):1292-9. Epub 2012/03/17. doi:  
4 10.1093/humrep/des073. PubMed PMID: 22422778.
- 5 27. Health. NIo. Estimates of funding for various research, condition, and disease categories  
6 (RCDC). 2019 [cited 2019 October 9]. Available from:  
7 [https://report.nih.gov/categorical\\_spending.aspx](https://report.nih.gov/categorical_spending.aspx).
- 8 28. The Practice Committee of the American Society for Reproductive Medicine. Treatment  
9 of pelvic pain associated with endometriosis: a committee opinion. 2014 2014/04/01/. Report  
10 No.: 0015-0282 Contract No.: 4.
- 11 29. Lamvu G, Soliman AM, Manthena SR, Gordon K, Knight J, Taylor HS. Patterns of  
12 prescription opioid use in women with endometriosis: evaluating prolonged use, daily dose, and  
13 concomitant use with benzodiazepines. *Obstetrics and gynecology.* 2019;133(6):1120.
- 14 30. Soliman AM, Surrey ES, Bonafede M, Nelson JK, Vora JB, Agarwal SK. Health care  
15 utilization and costs associated with endometriosis among women with medicaid insurance.  
16 *Journal of managed care & specialty pharmacy.* 2019;25(5):566-72.
- 17 31. Dowell D, Haegerich TM, Chou R. CDC guideline for prescribing opioids for chronic  
18 pain—United States, 2016. *Jama.* 2016;315(15):1624-45.
- 19 32. Krebs EE, Gravely A, Nugent S, Jensen AC, DeRonne B, Goldsmith ES, et al. Effect of  
20 opioid vs nonopioid medications on pain-related function in patients with chronic back pain or  
21 hip or knee osteoarthritis pain: the SPACE randomized clinical trial. *Jama.* 2018;319(9):872-82.
- 22 33. Sluka KA, Frey-Law L, Hoeger Bement M. Exercise-induced pain and analgesia?  
23 Underlying mechanisms and clinical translation. *Pain.* 2018;159 Suppl 1(Suppl 1):S91-S7. doi:  
24 10.1097/j.pain.0000000000001235. PubMed PMID: 30113953.
- 25 34. Tour J, Löfgren M, Mannerkorpi K, Gerdle B, Larsson A, Palstam A, et al. Gene-to-gene  
26 interactions regulate endogenous pain modulation in fibromyalgia patients and healthy controls-  
27 antagonistic effects between opioid and serotonin-related genes. *Pain.* 2017;158(7):1194-203.  
28 Epub 2017/03/11. doi: 10.1097/j.pain.0000000000000896. PubMed PMID: 28282362; PubMed  
29 Central PMCID: PMC5472004.
- 30 35. Bobinski F, Teixeira JM, Sluka KA, Santos ARS. Interleukin-4 mediates the analgesia  
31 produced by low-intensity exercise in mice with neuropathic pain. *Pain.* 2018;159(3):437-50.  
32 Epub 2017/11/16. doi: 10.1097/j.pain.0000000000001109. PubMed PMID: 29140923; PubMed  
33 Central PMCID: PMC5812806.
- 34 36. Montenegro ML, Bonoche CM, Meola J, Portella RL, Ribeiro-Silva A, Brunaldi MO, et  
35 al. Effect of Physical Exercise on Endometriosis Experimentally Induced in Rats. *Reproductive*  
36 *sciences (Thousand Oaks, Calif).* 2018:1933719118799205. Epub 2018/09/21. doi:  
37 10.1177/1933719118799205. PubMed PMID: 30231769.
- 38 37. Stratton P, Berkley KJ. Chronic pelvic pain and endometriosis: translational evidence of  
39 the relationship and implications. *Human reproduction update.* 2011;17(3):327-46. Epub  
40 2010/11/23. doi: 10.1093/humupd/dmq050. PubMed PMID: 21106492.
- 41 38. Park S-J, Yong M-S, Na S-S. Effect of exercise on the expression of nerve growth factor  
42 in the spinal cord of rats with induced osteoarthritis. *Journal of physical therapy science.*  
43 2015;27(8):2551-4. Epub 2015/08/21. doi: 10.1589/jpts.27.2551. PubMed PMID: 26357438.
- 44 39. Karasawa Y, Yamada K, Iseki M, Yamaguchi M, Murakami Y, Tamagawa T, et al.  
45 Association between change in self-efficacy and reduction in disability among patients with  
46 chronic pain. *PLOS ONE.* 2019;14(4):e0215404. doi: 10.1371/journal.pone.0215404.
- 47  
48  
49  
50  
51  
52  
53  
54  
55  
56  
57  
58  
59

- 1  
2  
3  
4  
5  
6  
7  
8  
9  
10  
11  
12  
13  
14  
15  
16  
17  
18  
19  
20  
21  
22  
23  
24  
25  
26  
27  
28  
29  
30  
31  
32  
33  
34  
35  
36  
37  
38  
39  
40  
41  
42  
43  
44  
45  
46  
47  
48  
49  
50  
51  
52  
53  
54  
55  
56  
57  
58  
59  
60
40. Armour M, Sinclair J, Chalmers KJ, Smith CA. Self-management strategies amongst Australian women with endometriosis: a national online survey. *BMC Complementary and Alternative Medicine*. 2019;19(1):17. doi: 10.1186/s12906-019-2431-x.
  41. Gonçalves AV, Barros NF, Bahamondes L. The Practice of Hatha Yoga for the Treatment of Pain Associated with Endometriosis. *Journal of Alternative & Complementary Medicine*. 2017;23(1):45-52. doi: 10.1089/acm.2015.0343. PubMed PMID: 120746246.
  42. Ricci E, Viganò P, Cipriani S, Chiaffarino F, Bianchi S, Rebonato G, et al. Physical activity and endometriosis risk in women with infertility or pain: Systematic review and meta-analysis. *Medicine*. 2016;95(40):e4957-e. doi: 10.1097/MD.0000000000004957. PubMed PMID: 27749551.
  43. Carpenter SE, Tjaden B, Rock JA, Kimball A. The effect of regular exercise on women receiving danazol for treatment of endometriosis. *International journal of gynaecology and obstetrics: the official organ of the International Federation of Gynaecology and Obstetrics*. 1995;49(3):299-304. Epub 1995/06/01. PubMed PMID: 9764869.
  44. Bonoche CM, Montenegro ML, Rosa ESJC, Ferriani RA, Meola J. Endometriosis and physical exercises: a systematic review. *Reproductive biology and endocrinology : RB&E*. 2014;12:4. Epub 2014/01/08. doi: 10.1186/1477-7827-12-4. PubMed PMID: 24393293; PubMed Central PMCID: PMC3895811.
  45. Naugle KM, Fillingim RB, Riley JL, 3rd. A meta-analytic review of the hypoalgesic effects of exercise. *The journal of pain : official journal of the American Pain Society*. 2012;13(12):1139-50. Epub 2012/11/08. doi: 10.1016/j.jpain.2012.09.006. PubMed PMID: 23141188.
  46. Janal MN, Colt EWD, Clark WC, Glusman M. Pain sensitivity, mood and plasma endocrine levels in man following long-distance running: Effects of naloxone. *Pain*. 1984;19(1):13-25. doi: [https://doi.org/10.1016/0304-3959\(84\)90061-7](https://doi.org/10.1016/0304-3959(84)90061-7).
  47. Droste C, Greenlee MW, Schreck M, Roskamm H. Experimental pain thresholds and plasma beta-endorphin levels during exercise. *Medicine & Science in Sports & Exercise*. 1991;23(3):334-42. doi: 10.1249/00005768-199103000-00012.
  48. Scheef L, Jankowski J, Daamen M, Weyer G, Klingenberg M, Renner J, et al. An fMRI study on the acute effects of exercise on pain processing in trained athletes. *PAIN*. 2012;153(8).
  49. Hoffman MD, Hoffman DR. Exercisers Achieve Greater Acute Exercise-Induced Mood Enhancement Than Nonexercisers. *Archives of Physical Medicine and Rehabilitation*. 2008;89(2):358-63. doi: 10.1016/j.apmr.2007.09.026.
  50. Hallgren M, Moss ND, Gastin P. Regular exercise participation mediates the affective response to acute bouts of vigorous exercise. *J Sports Sci Med*. 2010;9(4):629-37. Epub 2010/01/01. PubMed PMID: 24149790; PubMed Central PMCID: PMC3761821.
  51. Chen Y-C, Chen C, Martínez RM, Etnier JL, Cheng Y. Habitual physical activity mediates the acute exercise-induced modulation of anxiety-related amygdala functional connectivity. *Scientific Reports*. 2019;9(1):19787. doi: 10.1038/s41598-019-56226-z.
  52. May M, Junghaenel DU, Ono M, Stone AA, Schneider S. Ecological Momentary Assessment Methodology in Chronic Pain Research: A Systematic Review. *J Pain*. 2018;19(7):699-716. Epub 2018/01/31. doi: 10.1016/j.jpain.2018.01.006. PubMed PMID: 29371113.
  53. Ensari I, Pichon A, Lipsky-Gorman S, Bakken S, Elhadad N. Augmenting the Clinical Data Sources for Enigmatic Diseases: A Cross-Sectional Study of Self-Tracking Data and Clinical Documentation in Endometriosis. *Applied Clinical Informatics*. 2020;11(05):769-84.

- 1  
2  
3 54. McKillop M, Mamykina L, Elhadad N, editors. *Designing in the Dark: Eliciting Self-tracking Dimensions for Understanding Enigmatic Disease*. Proceedings of the 2018 CHI Conference on Human Factors in Computing Systems; 2018: ACM.
- 4  
5  
6 55. Urteaga I, McKillop M, Elhadad N. Learning endometriosis phenotypes from patient-generated data. *npj Digital Medicine*. 2020;3(1):88. doi: 10.1038/s41746-020-0292-9.
- 7  
8 56. Ensari I, Elhadad N. Chapter 5 - mHealth for research: participatory research applications to gain disease insights. In: Syed-Abdul S, Zhu X, Fernandez-Luque L, editors. *Digital Health*: Elsevier; 2021. p. 79-102.
- 9  
10 57. McKillop M, Voigt N, Schnall R, Elhadad N. Exploring self-tracking as a participatory research activity among women with endometriosis. *Journal of Participatory Medicine*. 2016.
- 11  
12 58. Pratap A, Neto EC, Snyder P, Stepnowsky C, Elhadad N, Grant D, et al. Indicators of retention in remote digital health studies: a cross-study evaluation of 100,000 participants. *npj Digital Medicine*. 2020;3(1):21. doi: 10.1038/s41746-020-0224-8.
- 13  
14 59. Frost MH, Reeve BB, Liepa AM, Stauffer JW, Hays RD. What is sufficient evidence for the reliability and validity of patient-reported outcome measures? *Value Health*. 2007;10 Suppl 2:S94-s105. Epub 2007/11/13. doi: 10.1111/j.1524-4733.2007.00272.x. PubMed PMID: 17995479.
- 15  
16 60. Anthoine E, Moret L, Regnault A, Sébille V, Hardouin J-B. Sample size used to validate a scale: a review of publications on newly-developed patient reported outcomes measures. *Health Qual Life Outcomes*. 2014;12:176-. doi: 10.1186/s12955-014-0176-2. PubMed PMID: 25492701.
- 17  
18 61. US Department of Health Human Services. *Guidance for industry-Patient-reported outcome measures: Use in medical product development to support labeling claims*. 2009.
- 19  
20 62. Lomas J, Pickard L, Mohide A. Patient versus clinician item generation for quality-of-life measures: the case of language-disabled adults. *Medical Care*. 1987:764-9.
- 21  
22 63. Jamison RN, Raymond SA, Levine JG, Slawsby EA, Nedeljkovic SS, Katz NP. Electronic diaries for monitoring chronic pain: 1-year validation study. *Pain*. 2001;91(3):277-85.
- 23  
24 64. Haythornthwaite JA, Menefee LA, Heinberg LJ, Clark MR. Pain coping strategies predict perceived control over pain. *Pain*. 1998;77(1):33-9.
- 25  
26 65. Melzack R. The McGill Pain Questionnaire: Major properties and scoring methods. *PAIN*. 1975;1(3).
- 27  
28 66. Jones KR, Vojir CP, Hutt E, Fink R. Determining mild, moderate, and severe pain equivalency across pain-intensity tools in nursing home residents. *J Rehabil Res Dev*. 2007;44(2):305-14. Epub 2007/06/07. doi: 10.1682/jrrd.2006.05.0051. PubMed PMID: 17551881.
- 29  
30 67. Bestel E, Gotteland J-P, Donnez J, Taylor RN, Garner EI. Linzagolix for Endometriosis-Associated Pain: Lipid Changes After 52 Weeks of Treatment [25B]. *Obstetrics & Gynecology*. 2020;135:25S. doi: 10.1097/01.AOG.0000663180.46470.c9. PubMed PMID: 00006250-202005001-00082.
- 31  
32 68. Serlin RC, Mendoza TR, Nakamura Y, Edwards KR, Cleeland CS. When is cancer pain mild, moderate or severe? Grading pain severity by its interference with function. *Pain*. 1995;61(2):277-84. Epub 1995/05/01. doi: 10.1016/0304-3959(94)00178-h. PubMed PMID: 7659438.
- 33  
34 69. Adams P, Murnane EL, Elfenbein M, Wethington E, Gay G. Supporting the Self-Management of Chronic Pain Conditions with Tailored Momentary Self-Assessments. *Proc*
- 35  
36  
37  
38  
39  
40  
41  
42  
43  
44  
45  
46  
47  
48  
49  
50  
51  
52  
53  
54  
55  
56  
57  
58  
59  
60

- 1  
2  
3 SIGCHI Conf Hum Factor Comput Syst. 2017;2017:1065-77. doi: 10.1145/3025453.3025832.  
4 PubMed PMID: 30310887.
- 5 70. Lee RR, Rashid A, Ghio D, Thomson W, Cordingley L. "Seeing Pain Differently": A  
6 Qualitative Investigation Into the Differences and Similarities of Pain and Rheumatology  
7 Specialists' Interpretation of Multidimensional Mobile Health Pain Data From Children and  
8 Young People With Juvenile Idiopathic Arthritis. *JMIR Mhealth Uhealth*. 2019;7(7):e12952.  
9 Epub 2019/07/04. doi: 10.2196/12952. PubMed PMID: 31267979; PubMed Central PMCID:  
10 PMC6632104.
- 11 71. Bouhassira D, Attal N. All in one: Is it possible to assess all dimensions of any pain with  
12 a simple questionnaire? *PAIN*. 2009;144(1).
- 13 72. Boonstra AM, Stewart RE, Köke AJA, Oosterwijk RFA, Swaan JL, Schreurs KMG, et al.  
14 Cut-Off Points for Mild, Moderate, and Severe Pain on the Numeric Rating Scale for Pain in  
15 Patients with Chronic Musculoskeletal Pain: Variability and Influence of Sex and  
16 Catastrophizing. *Front Psychol*. 2016;7:1466-. doi: 10.3389/fpsyg.2016.01466. PubMed PMID:  
17 27746750.
- 18 73. Pilitsis JG, Fahey M, Custozzo A, Chakravarthy K, Capobianco R. Composite score is a  
19 better reflection of patient response to chronic pain therapy compared with pain intensity alone.  
20 *Neuromodulation: Technology at the Neural Interface*. 2021;24(1):68-75.
- 21 74. Dirks JF, Wunder J, Kinsman R, McElhinny J, Jones NF. A Pain Rating Scale and a Pain  
22 Behavior Checklist for Clinical Use: Development, Norms, and the Consistency Score.  
23 *Psychotherapy and Psychosomatics*. 1993;59(1):41-9.
- 24 75. Faurholt-Jepsen M, Munkholm K, Frost M, Bardram JE, Kessing LV. Electronic self-  
25 monitoring of mood using IT platforms in adult patients with bipolar disorder: A systematic  
26 review of the validity and evidence. *BMC Psychiatry*. 2016;16(1):7. doi: 10.1186/s12888-016-  
27 0713-0.
- 28 76. Charter RA. Sample size requirements for precise estimates of reliability,  
29 generalizability, and validity coefficients. *J Clin Exp Neuropsychol*. 1999;21(4):559-66. Epub  
30 1999/11/07. doi: 10.1076/jcen.21.4.559.889. PubMed PMID: 10550813.
- 31 77. Knell G, Gabriel KP, Businelle MS, Shuval K, Wetter DW, Kendzor DE. Ecological  
32 Momentary Assessment of Physical Activity: Validation Study. *J Med Internet Res*.  
33 2017;19(7):e253. doi: 10.2196/jmir.7602.
- 34 78. Swendeman D, Comulada WS, Koussa M, Worthman CM, Estrin D, Rotheram-Borus  
35 MJ, et al. Longitudinal Validity and Reliability of Brief Smartphone Self-Monitoring of Diet,  
36 Stress, and Physical Activity in a Diverse Sample of Mothers. *JMIR Mhealth Uhealth*.  
37 2018;6(9):e176. Epub 2018/09/27. doi: 10.2196/mhealth.9378. PubMed PMID: 30249576;  
38 PubMed Central PMCID: PMC6231816.
- 39 79. Katapally TR, Chu LM. Digital epidemiological and citizen science methodology to  
40 capture prospective physical activity in free-living conditions: a SMART Platform study. *BMJ*  
41 *Open*. 2020;10(6):e036787. Epub 2020/07/01. doi: 10.1136/bmjopen-2020-036787. PubMed  
42 PMID: 32595163; PubMed Central PMCID: PMC67322321.
- 43 80. Zink J, Belcher BR, Dzibur E, Ke W, O'Connor S, Huh J, et al. Association Between  
44 Self-Reported and Objective Activity Levels by Demographic Factors: Ecological Momentary  
45 Assessment Study in Children. *JMIR Mhealth Uhealth*. 2018;6(6):e150. doi:  
46 10.2196/mhealth.9592.
- 47  
48  
49  
50  
51  
52  
53  
54  
55  
56  
57  
58  
59  
60

- 1  
2  
3 81. Ensari I, Greenlee TA, Motl RW, Petruzzello SJ. Meta-analysis of acute exercise effects  
4 on state anxiety: An update of randomized controlled trials over the past 25 years. *Depression*  
5 and anxiety. 2015;32(8):624-34.
- 6 82. Ensari I, Petruzzello SJ, Motl RW. The effects of acute yoga on anxiety symptoms in  
7 response to a carbon dioxide inhalation task in women. *Complementary Therapies in Medicine*.  
8 2019;102230. doi: <https://doi.org/10.1016/j.ctim.2019.102230>.
- 9 83. van Buuren S, Groothuis-Oudshoorn K. mice: Multivariate Imputation by Chained  
10 Equations in R. *Journal of Statistical Software*; Vol 1, Issue 3 (2011). 2011.
- 11 84. Van Buuren S. *Flexible imputation of missing data*: CRC press; 2018.
- 12 85. Bondarenko I, Raghunathan T. Graphical and numerical diagnostic tools to assess  
13 suitability of multiple imputations and imputation models. *Statistics in Medicine*.  
14 2016;35(17):3007-20. doi: <https://doi.org/10.1002/sim.6926>.
- 15 86. Hu M-C, Pavlicova M, Nunes EV. Zero-inflated and hurdle models of count data with  
16 extra zeros: examples from an HIV-risk reduction intervention trial. *Am J Drug Alcohol Abuse*.  
17 2011;37(5):367-75. doi: 10.3109/00952990.2011.597280. PubMed PMID: 21854279.
- 18 87. Brooks ME, Kristensen K, van Benthem KJ, Magnusson A, Berg CW, Nielsen A, et al.  
19 glmmTMB balances speed and flexibility among packages for zero-inflated generalized linear  
20 mixed modeling. *The R journal*. 2017;9(2):378-400.
- 21 88. Brooks ME, Kristensen K, van Benthem KJ, Magnusson A, Berg CW, Nielsen A, et al.  
22 Modeling zero-inflated count data with glmmTMB. *bioRxiv*. 2017:132753. doi: 10.1101/132753.
- 23 89. Schunck R. Cluster Size and Aggregated Level 2 Variables in Multilevel Models. A  
24 Cautionary Note. 2016. 2016;10(1). Epub 2016-07-20. doi: 10.12758/mda.2016.005.
- 25 90. Bell B, Ferron J, Kromrey J, editors. *Cluster Size in Multilevel Models: The Impact of*  
26 *Sparse Data Structures on Point and Interval Estimates in Two-Level Models* 2008.
- 27 91. Austin PC, Leckie G. The effect of number of clusters and cluster size on statistical  
28 power and Type I error rates when testing random effects variance components in multilevel  
29 linear and logistic regression models. *Journal of Statistical Computation and Simulation*.  
30 2018;88(16):3151-63. doi: 10.1080/00949655.2018.1504945.
- 31 92. Everitt B, Howell D, Snijders T, editors. *Power and sample size in multilevel*  
32 *modeling* 2006.
- 33 93. Team R. Core (2020). R: A language and environment for statistical computing R  
34 Foundation for Statistical Computing, Vienna, Austria URL <https://www.R-project.org>. 2020.
- 35 94. Rubin DB. The Calculation of Posterior Distributions by Data Augmentation: Comment:  
36 A Noniterative Sampling/Importance Resampling Alternative to the Data Augmentation  
37 Algorithm for Creating a Few Imputations When Fractions of Missing Information Are Modest:  
38 The SIR Algorithm. *Journal of the American Statistical Association*. 1987;82(398):543-6. doi:  
39 10.2307/2289460.
- 40 95. Rubin DB. *Multiple imputation for nonresponse in surveys*: John Wiley & Sons; 2004.
- 41 96. Scheipl F, Greven S, Küchenhoff H. Size and power of tests for a zero random effect  
42 variance or polynomial regression in additive and linear mixed models. *Computational statistics*  
43 *& data analysis*. 2008;52(7):3283-99.
- 44 97. Crainiceanu CM, Ruppert D. Likelihood ratio tests in linear mixed models with one  
45 variance component. *Journal of the Royal Statistical Society: Series B (Statistical Methodology)*.  
46 2004;66(1):165-85.
- 47 98. US Department of Health Human Services Physical activity guidelines advisory  
48 committee scientific report. 2018.
- 49  
50  
51  
52  
53  
54  
55  
56  
57  
58  
59  
60

- 1  
2  
3 99. Piercy KL, Troiano RP, Ballard RM, Carlson SA, Fulton JE, Galuska DA, et al. The  
4 physical activity guidelines for Americans. *Jama*. 2018;320(19):2020-8.  
5  
6 100. Warzecha D, Szymusik I, Wielgos M, Pietrzak B. The Impact of Endometriosis on the  
7 Quality of Life and the Incidence of Depression-A Cohort Study. *Int J Environ Res Public*  
8 *Health*. 2020;17(10). Epub 2020/05/28. doi: 10.3390/ijerph17103641. PubMed PMID:  
9 32455821; PubMed Central PMCID: PMC7277332.  
10 101. Becker N, Thomsen AB, Olsen AK, Sjogren P, Bech P, Eriksen J. Pain epidemiology and  
11 health related quality of life in chronic non-malignant pain patients referred to a Danish  
12 multidisciplinary pain center. *Pain*. 1997;73(3):393-400. doi: 10.1016/s0304-3959(97)00126-7.  
13 PubMed PMID: WOS:000071429200014.  
14 102. Bouhassira D, Lantéri-Minet M, Attal N, Laurent B, Touboul C. Prevalence of chronic  
15 pain with neuropathic characteristics in the general population. *Pain*. 2008;136(3):380-7.  
16 103. Nicholas MK, Asghari A, Blyth FM. What do the numbers mean? Normative data in  
17 chronic pain measures. *Pain*. 2008;134(1):158-73. doi:  
18 <https://doi.org/10.1016/j.pain.2007.04.007>.  
19  
20 104. Dansie EJ, Turk DC. Assessment of patients with chronic pain. *Br J Anaesth*.  
21 2013;111(1):19-25. doi: 10.1093/bja/aet124. PubMed PMID: 23794641.  
22 105. Schneider S, Stone AA, Schwartz JE, Broderick JE. Peak and end effects in patients'  
23 daily recall of pain and fatigue: a within-subjects analysis. *J Pain*. 2011;12(2):228-35. doi:  
24 10.1016/j.jpain.2010.07.001. PubMed PMID: 20817615.  
25 106. De Boer M, Struys M, Versteegen G. Pain-related catastrophizing in pain patients and  
26 people with pain in the general population. *European journal of pain*. 2012;16(7):1044-52.  
27 107. Ehde DM, Gibbons LE, Chwastiak L, Bombardier CH, Sullivan MD, Kraft GH. Chronic  
28 pain in a large community sample of persons with multiple sclerosis. *Multiple Sclerosis Journal*.  
29 2003;9(6):605-11. doi: 10.1191/1352458503ms939oa.  
30 108. Katzmarzyk PT, Powell KE, Jakicic JM, Troiano RP, Piercy K, Tennant B, et al.  
31 Sedentary Behavior and Health: Update from the 2018 Physical Activity Guidelines Advisory  
32 Committee. *Med Sci Sports Exerc*. 2019;51(6):1227-41. doi: 10.1249/MSS.0000000000001935.  
33 PubMed PMID: 31095080.  
34 109. Basen-Engquist K, Scruggs S, Jhingran A, Bodurka DC, Lu K, Ramondetta L, et al.  
35 Physical activity and obesity in endometrial cancer survivors: associations with pain, fatigue, and  
36 physical functioning. *Am J Obstet Gynecol*. 2009;200(3):288.e1-.e2888. Epub 2008/12/25. doi:  
37 10.1016/j.ajog.2008.10.010. PubMed PMID: 19110220.  
38 110. Dansie EJ, Turk DC, Martin KR, Van Domelen DR, Patel KV. Association of Chronic  
39 Widespread Pain With Objectively Measured Physical Activity in Adults: Findings From the  
40 National Health and Nutrition Examination Survey. *The Journal of Pain*. 2014;15(5):507-15. doi:  
41 <https://doi.org/10.1016/j.jpain.2014.01.489>.  
42 111. Just JM, Scherbaum N, Specka M, Puth MT, Weckbecker K. Rate of opioid use disorder  
43 in adults who received prescription opioid pain therapy-A secondary data analysis. *PLoS One*.  
44 2020;15(7):e0236268. Epub 2020/07/24. doi: 10.1371/journal.pone.0236268. PubMed PMID:  
45 32702036.  
46 112. Sinatra R. Causes and consequences of inadequate management of acute pain. *Pain Med*.  
47 2010;11(12):1859-71. Epub 2010/11/03. doi: 10.1111/j.1526-4637.2010.00983.x. PubMed  
48 PMID: 21040438.  
49  
50  
51  
52  
53  
54  
55  
56  
57  
58  
59  
60



- 1  
2  
3 113. Engeler DS, Baranowski AP, Dinis-Oliveira P, Elneil S, Hughes J, Messelink EJ, et al.  
4 The 2013 EAU guidelines on chronic pelvic pain: is management of chronic pelvic pain a habit,  
5 a philosophy, or a science? 10 years of development. *European urology*. 2013;64(3):431-9.  
6 114. Awad E, Ahmed HAH, Yousef A, Abbas R. Efficacy of exercise on pelvic pain and  
7 posture associated with endometriosis: within subject design. *Journal of physical therapy*  
8 *science*. 2017;29(12):2112-5. Epub 2017/12/07. doi: 10.1589/jpts.29.2112. PubMed PMID:  
9 29643586.  
10 115. Polaski AM, Phelps AL, Kostek MC, Szucs KA, Kolber BJ. Exercise-induced  
11 hypoalgesia: A meta-analysis of exercise dosing for the treatment of chronic pain. *PloS one*.  
12 2019;14(1):e0210418-e. doi: 10.1371/journal.pone.0210418. PubMed PMID: 30625201.  
13 116. Almirall D, Compton SN, Gunlicks-Stoessel M, Duan N, Murphy SA. Designing a pilot  
14 sequential multiple assignment randomized trial for developing an adaptive treatment strategy.  
15 *Statistics in medicine*. 2012;31(17):1887-902. Epub 2012/03/23. doi: 10.1002/sim.4512. PubMed  
16 PMID: 22438190; PubMed Central PMCID: PMC3399974.  
17 117. Klasnja P, Smith S, Seewald NJ, Lee A, Hall K, Luers B, et al. Efficacy of Contextually  
18 Tailored Suggestions for Physical Activity: A Micro-randomized Optimization Trial of  
19 HeartSteps. *Annals of behavioral medicine : a publication of the Society of Behavioral Medicine*.  
20 2018. Epub 2018/09/08. doi: 10.1093/abm/kay067. PubMed PMID: 30192907.  
21 118. Nahum-Shani I, Smith SN, Spring BJ, Collins LM, Witkiewitz K, Tewari A, et al. Just-  
22 in-Time Adaptive Interventions (JITAIs) in Mobile Health: Key Components and Design  
23 Principles for Ongoing Health Behavior Support. *Annals of behavioral medicine : a publication*  
24 *of the Society of Behavioral Medicine*. 2018;52(6):446-62. Epub 2016/09/25. doi:  
25 10.1007/s12160-016-9830-8. PubMed PMID: 27663578; PubMed Central PMCID:  
26 PMC5364076.  
27 119. Falcone T, Mascha E. The elusive diagnostic test for endometriosis. *Fertility and sterility*.  
28 2003;80(4):886-8.  
29 120. Marian S, Hermanowicz-Szamatowicz K. Endometriosis—a decade later—still an  
30 enigmatic disease. What is the new in the diagnosis and treatment? *Gynecological*  
31 *Endocrinology*. 2020;36(2):104-8.  
32 121. Fourquet J, Zavala DE, Missmer S, Bracero N, Romaguera J, Flores I. Disparities in  
33 healthcare services in women with endometriosis with public vs private health insurance.  
34 *American Journal of Obstetrics & Gynecology*. 2019;221(6):623.e1-e11. doi:  
35 10.1016/j.ajog.2019.06.020.  
36 122. Grimmer-Somers K, Vipond N, Kumar S, Hall G. A review and critique of assessment  
37 instruments for patients with persistent pain. *Journal of pain research*. 2009;2:21.  
38 123. Ensari I, Pichon A, Lipsky-Gorman S, Bakken S, Elhadad N. Augmenting the Clinical  
39 Data Sources for Enigmatic Diseases: a Cross-Sectional Study of Self-Tracking Data and  
40 Clinical Documentation in Endometriosis *Applied Clinical Informatics*, in press. 2020.  
41 124. Donnelly K. SNOMED-CT: The advanced terminology and coding system for eHealth.  
42 *Studies in health technology and informatics*. 2006;121:279.  
43 125. Gillum RF, Sempos CT. Ethnic variation in validity of classification of overweight and  
44 obesity using self-reported weight and height in American women and men: the Third National  
45 Health and Nutrition Examination Survey. *Nutrition journal*. 2005;4(1):27.  
46 126. Larsen JK, Ouwens M, Engels RC, Eisinga R, van Strien T. Validity of self-reported  
47 weight and height and predictors of weight bias in female college students. *Appetite*. 2008;50(2-  
48 3):386-9.  
49  
50  
51  
52  
53  
54  
55  
56  
57  
58  
59  
60

- 1  
2  
3 127. Grund S, Lüdtke O, Robitzsch A. Multiple imputation of missing data for multilevel  
4 models: Simulations and recommendations. *Organizational Research Methods*. 2018;21(1):111-  
5 49.  
6  
7 128. Barnard J, Rubin DB. Small-Sample Degrees of Freedom with Multiple Imputation.  
8 *Biometrika*. 1999;86(4):948-55.  
9 129. Little RJ. Missing-data adjustments in large surveys. *Journal of Business & Economic*  
10 *Statistics*. 1988;6(3):287-96.  
11 130. Nguyen CD, Carlin JB, Lee KJ. Model checking in multiple imputation: an overview and  
12 case study. *Emerging Themes in Epidemiology*. 2017;14(1):8. doi: 10.1186/s12982-017-0062-6.  
13  
14  
15  
16  
17  
18  
19  
20  
21  
22  
23  
24  
25  
26  
27  
28  
29  
30  
31  
32  
33  
34  
35  
36  
37  
38  
39  
40  
41  
42  
43  
44  
45  
46  
47  
48  
49  
50  
51  
52  
53  
54  
55  
56  
57  
58  
59  
60

Table 1. Study Sample Characteristics (N=1009).

| Characteristic (N)                 | Mean (SD)                                               |
|------------------------------------|---------------------------------------------------------|
| Age (827)                          | 31.0 (7.26), Median=30.6 (MAD=7.41), Range= 14.3-62.9   |
| BMI (787)                          | 25.9 (6.98), Median=24.1 (MAD=4.74), Range= 16.01-72.24 |
| Type of endometriosis diagnosis    | Frequency (%)                                           |
| Surgery                            | 702 (69.57%)                                            |
| Clinician                          | 200 (19.82%)                                            |
| Self-diagnosis                     | 107 (10.60%)                                            |
| Characteristic (N)                 | Frequency (%)                                           |
| <u>Work Environment</u>            |                                                         |
| Home (218)                         | 26.42                                                   |
| Outside (570)                      | 69.09                                                   |
| Unknown (221)                      | 21.29                                                   |
| <u>Living environment</u>          |                                                         |
| Rural (129)                        | 15.27                                                   |
| Suburban (340)                     | 41.21                                                   |
| Urban (363)                        | 44.00                                                   |
| Unknown (161)                      | 19.5                                                    |
| <u>Relationship status</u>         |                                                         |
| Married/domestic partnership (442) | 53.57                                                   |
| Separated/divorced (28)            | 3.39                                                    |
| Single/never married (310)         | 37.57                                                   |

1  
2  
3 Unknown (229) 22.69  
4  
5

6 Education Level  
7

8 College or higher (547) 66.30  
9

10 High school graduate or less (74) 8.96  
11

12 Some college (209) 25.33  
13

14 Unknown (179) 17.7  
15  
16

17 Employment Status  
18

19 Employed (541) 65.57  
20

21 Not employed (120) 14.54  
22

23 Student (129) 15.63  
24

25 Unknown (219) 21.70  
26  
27

28 Race/Ethnicity  
29

30 White, Non-Hispanic (699) 84.72  
31

32 Black, Non-Hispanic (20) 2.42  
33

34 Asian (22) 2.6  
35

36 Native American (6) 0.72  
37

38 Hispanic (38) 4.6  
39

40 Other (51) 6.18  
41

42 Unknown (173) 17.14  
43  
44

45 Country of Residence  
46

47 United States (444) 44.0  
48

49 United Kingdom (83) 8.22  
50

51 Canada (75) 7.43  
52  
53  
54  
55  
56  
57  
58  
59  
60

1  
2  
3  
4  
5  
6  
7  
8  
9  
10  
11  
12  
13  
14  
15  
16  
17  
18  
19  
20  
21  
22  
23  
24  
25  
26  
27  
28  
29  
30  
31  
32  
33  
34  
35  
36  
37  
38  
39  
40  
41  
42  
43  
44  
45  
46  
47  
48  
49  
50  
51  
52  
53  
54  
55  
56  
57  
58  
59  
60

|                  |       |
|------------------|-------|
| Australia (59)   | 5.84  |
| Germany (38)     | 3.76  |
| New Zealand (34) | 3.36  |
| Other (69)       | 6.83  |
| Unknown (207)    | 20.51 |

For peer review only

Table 2. Results of the regression model estimating day-level total pain score (N=1,009).

| <b>Conditional Random Effects</b>                         |  | <b>Variance (95% CI)</b>   |                      |                |
|-----------------------------------------------------------|--|----------------------------|----------------------|----------------|
| Participant                                               |  | 1.09 (0.98, 1.21)          |                      |                |
| <b>Conditional Fixed Effects</b>                          |  | <b>Rate Ratio (95% CI)</b> | <b>Log Odds (SE)</b> | <b>z-score</b> |
| Intercept                                                 |  | 4.26*** (3.26, 5.56)       | 1.45*** (0.13)       | 10.82          |
| Menstrual Status                                          |  | 1.29*** (1.25, 1.32)       | 0.25*** (0.01)       | 20.31          |
| Previous Day Pain                                         |  | 1.02*** (1.02, 1.03)       | 0.02*** (0.00)       | 29.69          |
| Body Mass Index                                           |  | 1.01* (1.00, 1.02)         | 0.01 (0.00)          | 2.02           |
| Mean Weekly Exercise Frequency                            |  | 0.93* (0.89, 0.97)         | -0.06** (0.02)       | -2.96          |
| Previous Day exercise                                     |  | 1.10* (1.05, 1.15)         | 0.09** (0.15)        | 3.88           |
| Some College Education Level                              |  | 0.87 (0.83, 1.56)          | 0.13 (0.15)          | 0.86           |
| College or Higher Education Level                         |  | 0.93 (0.66, 1.16)          | -0.13 (0.14)         | -0.92          |
| Mean Weekly Exercise Frequency *<br>Previous Day exercise |  | 0.96** (0.95, 0.98)        | -0.03** (0.01)       | -3.37          |
| <b>Zero Inflation Terms</b>                               |  | <b>Rate Ratio (95% CI)</b> | <b>Log Odds (SE)</b> | <b>z-score</b> |
| Intercept                                                 |  | 0.17 (0.16, 0.18)          | -1.73*** (0.02)      | -62.96         |
| Same Day Exercise                                         |  | 5.34 (5.01, 5.68)          | 1.67*** (0.03)       | 52.53          |

95% CI=95% Confidence Interval. \* $p < 0.05$  \*\*  $p < 0.001$ , \*\*\* $p < 0.0001$ . Previous day pain and BMI were sample mean-centered. BMI and education level were kept as covariates in the model based on their significant associations with mean day-level pain scores (Pearson's  $r=0.15$  for BMI and Kruskal-Wallis  $\chi^2 = 18.061$  for education level,  $p < 0.001$ ).

Table 3. Results of the regression model estimating pain score difference (N=1,009).

| <b>Conditional Random Effects</b> |  | <b>Variance (95% CI)</b>  |               |                |
|-----------------------------------|--|---------------------------|---------------|----------------|
| Participant (Intercept)           |  | 9.16 (8.28, 10.13)        |               |                |
| Residual                          |  | 26.83                     |               |                |
| <b>Conditional Fixed Effects</b>  |  | <b>B coefficient (SE)</b> | <b>95% CI</b> | <b>z-score</b> |
| Intercept                         |  | 2.70*** (0.51)            | 1.68, 3.72    | 5.29           |
| Menstrual Status                  |  | 1.47*** (0.09)            | 1.28, 1.66    | 15.43          |
| Previous Day Pain                 |  | -0.86*** (0.01)           | -0.87, -0.85  | -143.43        |
| Body Mass Index                   |  | 0.05* (0.01)              | 0.01, 0.10    | 2.86           |
| Mean Weekly Exercise Frequency    |  | -0.27** (0.08)            | -0.44, -0.10  | -3.12          |
| Previous Day Exercise             |  | 0.92** (0.18)             | 0.56, 1.27    | 5.08           |
| Some College Education Level      |  | -0.84 (0.62)              | -2.11, 0.42   | -1.35          |
| College or Higher Education Level |  | -2.07** (0.52)            | -3.10, -1.03  | -3.96          |
| Mean Weekly Exercise Frequency *  |  | -0.14* (0.06)             | -0.26, -0.01  | -2.22          |
| Previous Day Exercise             |  |                           |               |                |
| <b>Zero Inflation Terms</b>       |  | <b>B coefficient</b>      | <b>95% CI</b> | <b>z-score</b> |
| Intercept                         |  | -0.91*** (0.01)           | -0.93, -0.88  | -63.84         |
| Same Day Exercise                 |  | 0.70*** (0.02)            | 0.66, 0.75    | 32.09          |

SE= Standard Error. \*p<0.05 \*\* p <0.001, \*\*\*p<0.0001. Previous day pain and BMI were sample mean-centered. BMI and education level were kept as covariates in the model based on their significant associations with mean day-level pain scores (Pearson's  $r=0.15$  for BMI and Kruskal-Wallis  $\chi^2 = 18.061$  for education level,  $p<0.001$ ).

1  
2  
3 Figure 1. Prevalence of pain severity by location reported among participants (i.e., unique counts  
4 of body area-severity per participant). Moderate intensity was the most frequently tracked across  
5 all body areas (14.1%-85.4%).  
6

7  
8 Figure 2. Prevalence of self-reported exercise modalities in the study sample. “Other  
9 cardiovascular” category include activities such as dancing, aerobics and using the elliptical  
10 machine. “Muscle strength and endurance” category includes activities such as weight lifting and  
11 calisthenics. “Other exercise” category includes sports activities such as skiing and soccer, multi-  
12 modal exercises (e.g., high intensity interval training of both cardiovascular and muscular  
13 endurance), or those that did not fit into the other categories (e.g., stabilizing or balancing  
14 exercises, wii fit or other home based fitness activities).  
15

16  
17 Panel Figure 3. Moderation of effect of previous-day exercise by habitual exercise levels (X  
18 axes). Y axes represent predicted day-level total scores (top) and differences (bottom) in pain.  
19 Shaded areas depict 95% confidence intervals. At approximately 3 times/week of regular  
20 exercise, previous day exercise starts to be associated with more favorable pain outcomes on the  
21 following day (i.e., decrease from the model predicted mean scores), adjusted for other day-level  
22 and person level factors.  
23

24  
25 Figure 4. Plot of the random effect of the participant on total day pain scores estimated from the  
26 multilevel model (N=1,009). Y-axis represents the range of estimated average pain scores for  
27 each participant. Each black dot represents one participant’s mean (i.e., random intercept), grey  
28 lines indicate 95% confidence intervals. Distribution of points across the x-axis indicate large  
29 variability across individuals (i.e., between-group variance), and the grey lines indicate the  
30 within-person variability in daily scores over time.  
31  
32  
33  
34  
35  
36  
37  
38  
39  
40  
41  
42  
43  
44  
45  
46  
47  
48  
49  
50  
51  
52  
53  
54  
55  
56  
57  
58  
59  
60



1  
2  
3  
4  
5  
6  
7  
8  
9  
10  
11  
12  
13  
14  
15  
16  
17  
18  
19  
20  
21  
22  
23  
24  
25  
26  
27  
28  
29  
30  
31  
32  
33  
34  
35  
36  
37  
38  
39  
40  
41  
42  
43  
44  
45  
46  
47  
48  
49  
50  
51  
52  
53  
54  
55  
56  
57  
58  
59  
60

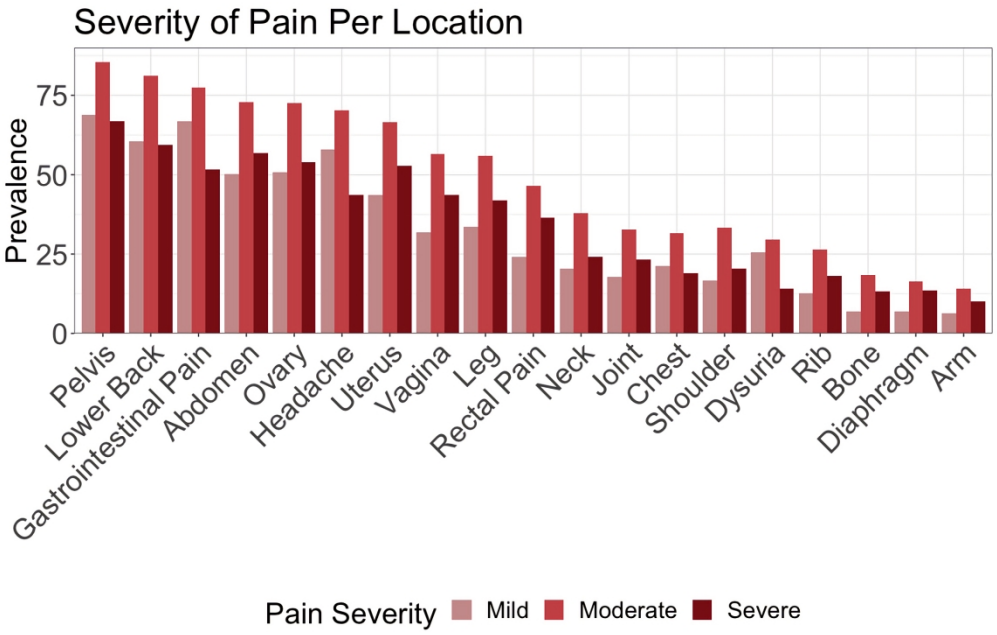

776x493mm (72 x 72 DPI)

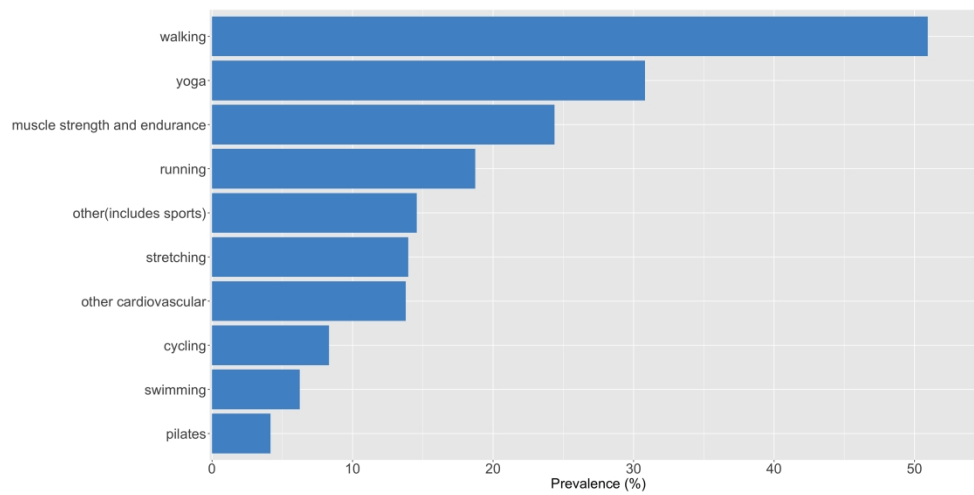

1411x705mm (72 x 72 DPI)

1  
2  
3  
4  
5  
6  
7  
8  
9  
10  
11  
12  
13  
14  
15  
16  
17  
18  
19  
20  
21  
22  
23  
24  
25  
26  
27  
28  
29  
30  
31  
32  
33  
34  
35  
36  
37  
38  
39  
40  
41  
42  
43  
44  
45  
46  
47  
48  
49  
50  
51  
52  
53  
54  
55  
56  
57  
58  
59  
60

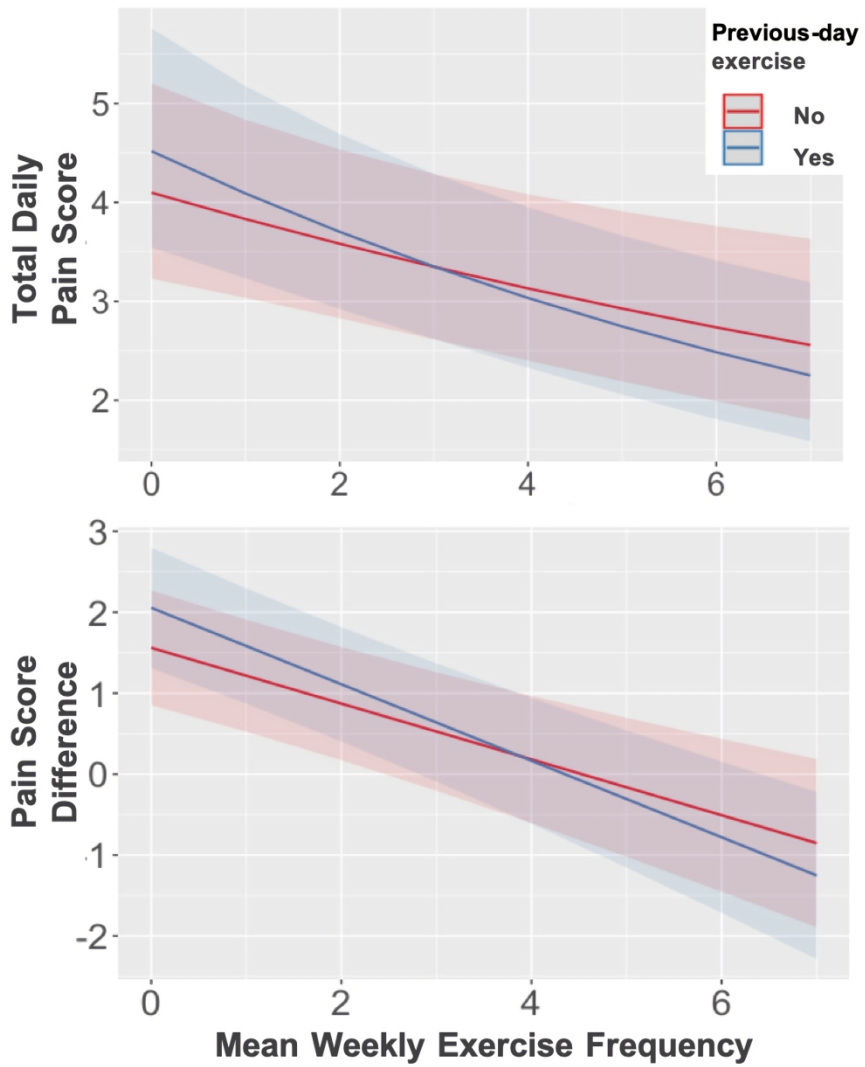

694x750mm (72 x 72 DPI)

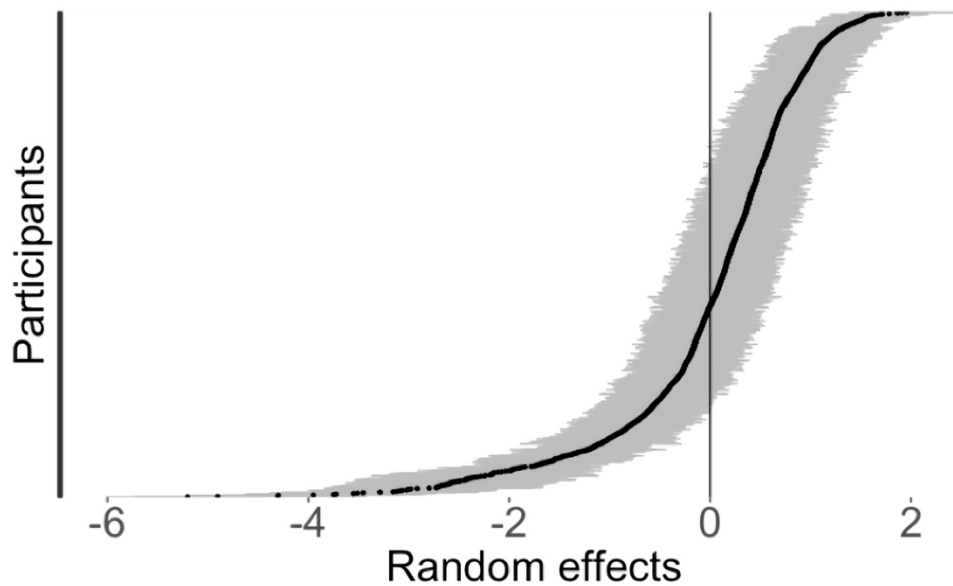

571x339mm (72 x 72 DPI)

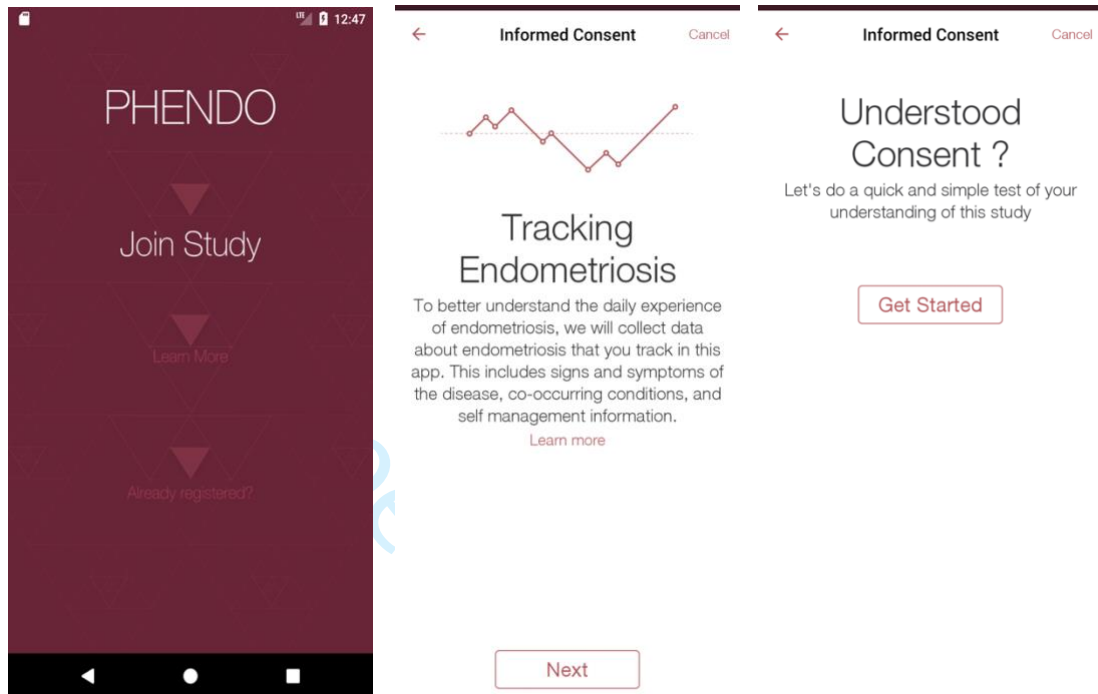

Supplementary Figure 1. Screenshots of the Phendo Registration/download page (left), beginning of the informed consent obtainment (middle), and self-quiz to verify consent (right).

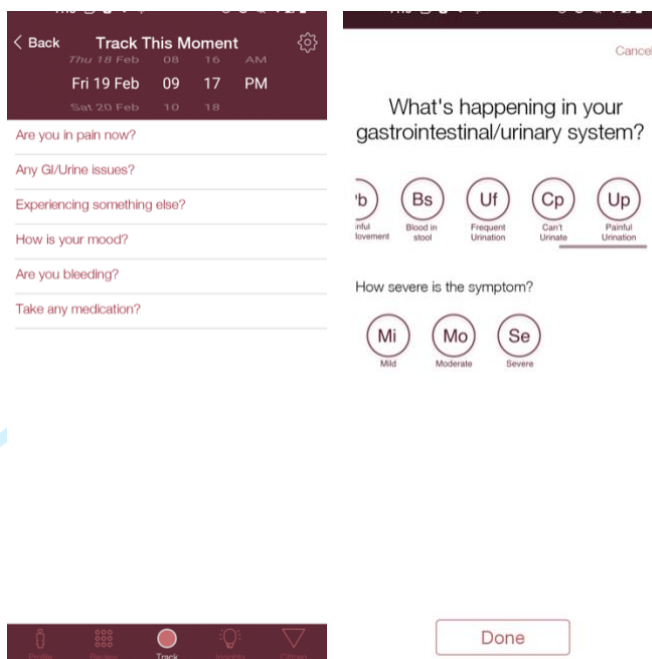

Supplementary Figure 2. Screenshots of Phendo's momentary tracking tab (left) and an example individual symptom and severity tracking (right).

### Supplementary File 1. Missing Data Imputations.

Because Phendo is an observational research app and participants are free to track (or not track) any given item as they so wish and do not receive prompts from the research team to track any given item at a certain time, missingness in the data occurs due to a variety of possible reasons that are difficult to distinguish. For example, a period not tracked for a day could mean that the participant did not have a period, or they chose not to track, or did not use the app at all that day. To circumvent this issue, we took several measures. First, we limited data to days for which the participant tracked their pain, exercise and menstrual status at least once, as a proxy for app use. Next, we assigned a score of zero for pain on days where the participant had tracked exercise or menstrual status but not pain. This approach is motivated by 2 reasons. First, the nature of the pain question in Phendo (i.e., “Where is the pain?”, “How severe is the pain?”) assumes the participants to track when they feel pain and therefore a “No Pain” response is neither available in the app nor would make sense. Second, multiple imputation methods impute such that the resulting imputations are limited to the observed values and distributions. Thus by default it would omit the possibility of a zero in the resultant pain score distribution, which increases risk of overestimation of the scores in the sample.

BMI (calculated from participant reported height and weight) and education level were missing for 22% and 19% of the participants, respectively, and menstrual status was missing (i.e., not tracked) 22% of the time in the dataset. We imputed these 3 variables using multivariate imputations by chained equations [83] according to the heteroscedastic linear two-level (i.e., hierarchical where, participant is the clustering variable) structure of the data following published guidelines on multilevel multiple imputation methods. [83, 84, 127, 128] We used

two-level predictive mean matching for BMI and education level, which is a semi-parametric imputation method that limits imputations to the observed values and can preserve non-linear relations in the observed data, therefore the imputations do not deviate from the observed distribution[129] and two-level logistic regression for imputing menstrual status, using the rest of the dataset as the predictors. As per published recommendations,[83, 84] we also included the raw pain variable (i.e., with the missing values) as a predictor, to account for the possibility of an association between the missingness pattern of pain to these imputed variables. To assess the plausibility of the imputations and any significant deviance from the structure of the raw, non-imputed data, we inspected the imputation convergence plots, distributions of the imputed variables which are provided in Supplementary Figures 3 and 4.

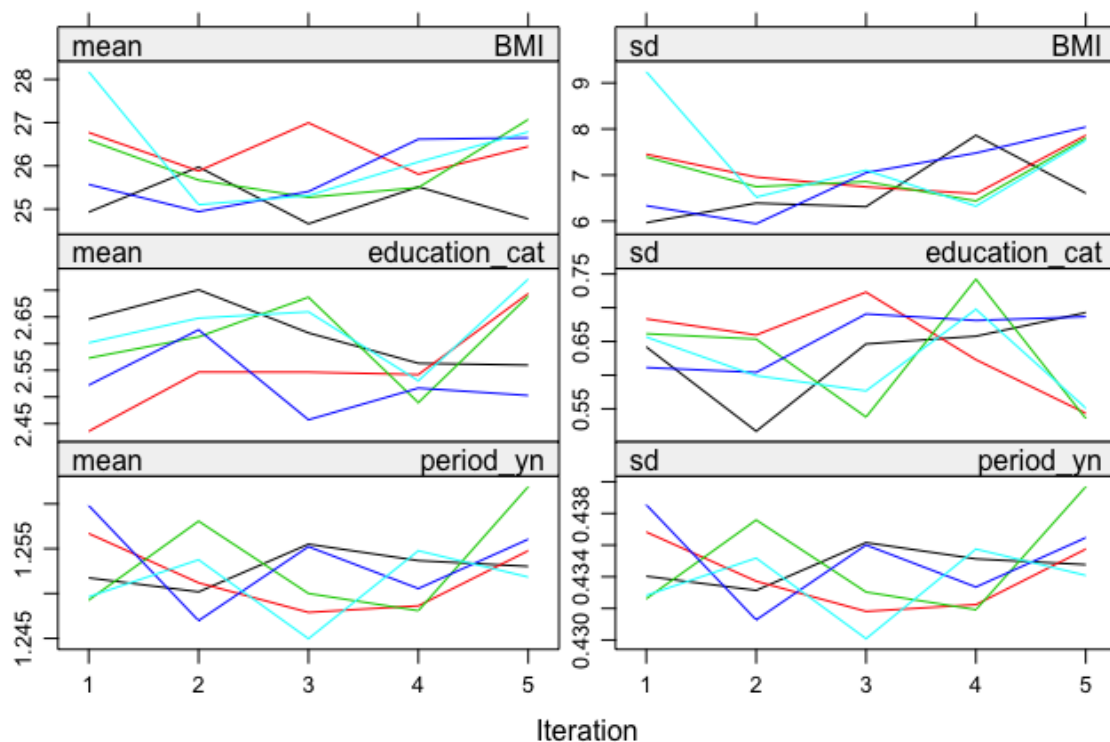

Supplementary Figure 3. Convergence plots for the 3 imputed variables (BMI, top; education, middle; menstrual status, bottom) with means on the left and standard deviations on the right side of the panel. Plots indicate healthy convergence based on lack significant trend and the streams mingling well right from the start throughout the 5 iterations (x-axis).



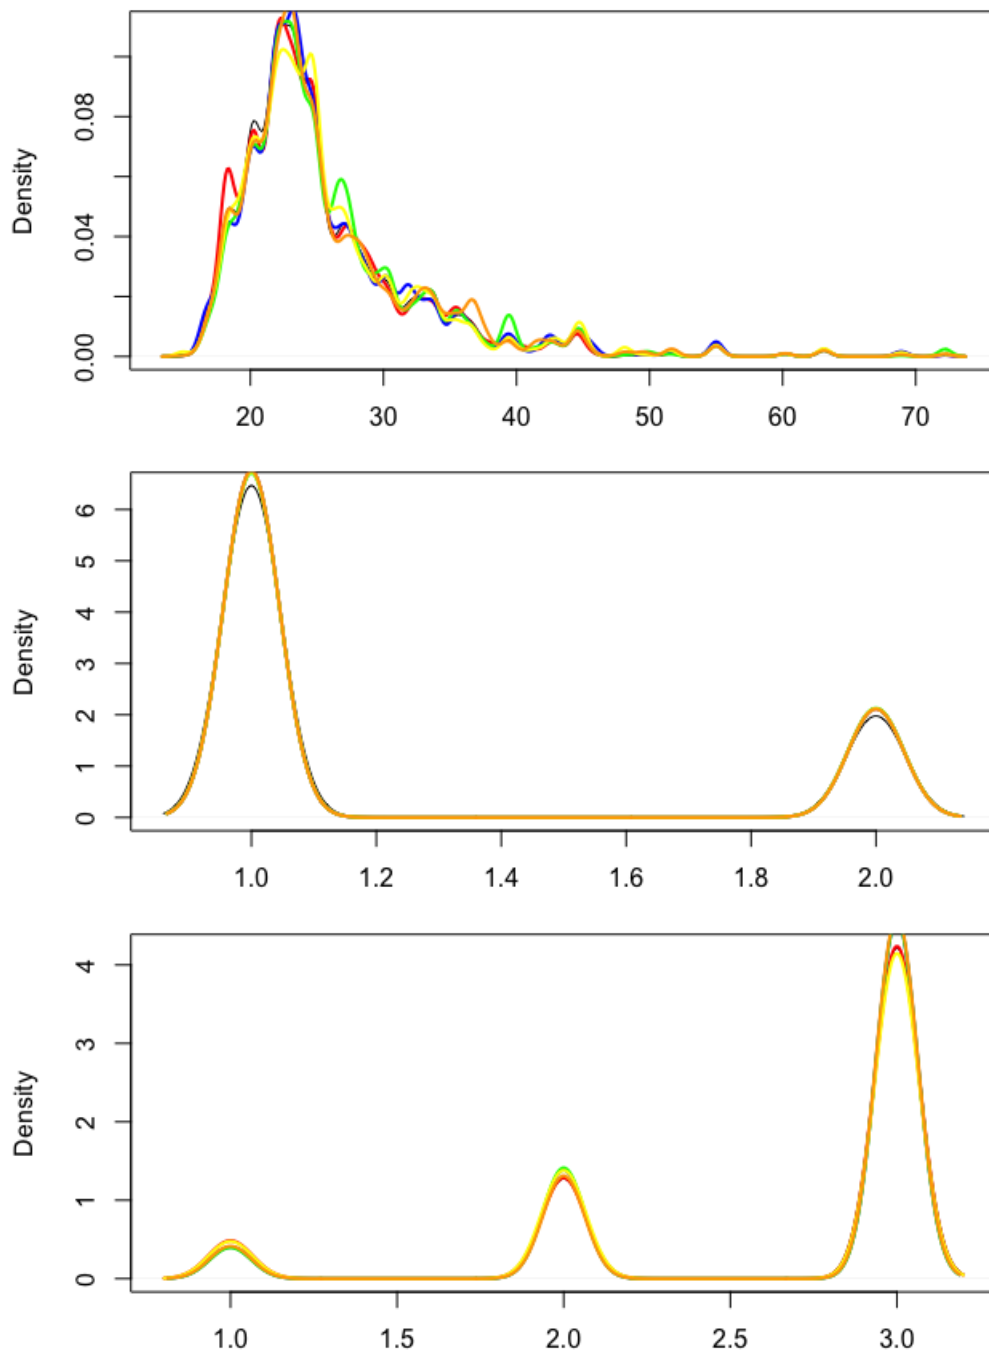

Supplementary Figure 4. Density plots of the marginal distributions of BMI (top), menstrual status (middle), and education category (bottom) of raw, non-imputed data and 5 iterations of the imputed data. Close super-imposition of the curves indicate that the imputed data distributions match those of raw data.

## Supplementary File 2. Imputation Model diagnostics.

Appropriateness and plausibility of the estimates from imputed models were inspected following published guidelines. First, we used measures of missing data information to assess pooled estimate variances. The fraction of missing information ( $\lambda$ ) is interpreted as the proportion of variation in the parameter of interest due to the missing data. The relative increase in variance due to nonresponse ( $r$ ) is interpreted as the proportional increase in the sampling variance of the parameter of interest that is due to the missing data. Values of  $\lambda$  over 0.5 indicate that the influence of the imputation model on the results is larger than that of the complete-data model, suggesting potential problems in the imputations. Supplementary Table 1 provides results of these variance estimates, indicating satisfactory imputation and model fit.

**Supplementary Table 1. Measures of Missing data information**

| <b>Conditional Fixed Effects</b>  | <b>Total Pain Score</b> |      | <b>Difference in Pain</b> |      |
|-----------------------------------|-------------------------|------|---------------------------|------|
|                                   | $\lambda$               | $r$  | $\lambda$                 | $r$  |
| Intercept                         | 0.21                    | 0.27 | 0.23                      | 0.31 |
| Menstrual Status                  | 0.13                    | 0.15 | 0.19                      | 0.23 |
| Previous Day Pain                 | 0.01                    | 0.01 | 0.00                      | 0.00 |
| Body Mass Index                   | 0.13                    | 0.15 | 0.23                      | 0.31 |
| Mean Weekly Exercise Frequency    | 0.00                    | 0.00 | 0.01                      | 0.01 |
| Previous Day exercise             | 0.01                    | 0.01 | 0.00                      | 0.00 |
| Some College Education Level      | 0.26                    | 0.36 | 0.35                      | 0.55 |
| College or Higher Education Level | 0.23                    | 0.31 | 0.21                      | 0.28 |
| Mean Weekly Exercise Frequency *  | 0.00                    | 0.00 | 0.00                      | 0.00 |
| Previous Day exercise             |                         |      |                           |      |
| <b>Zero Inflation Terms</b>       |                         |      |                           |      |
| Intercept                         | 0.00                    | 0.00 | 0.00                      | 0.00 |
| Same Day Exercise                 | 0.00                    | 0.00 | 0.00                      | 0.00 |

Next, we inspected propensity scores, which is a more recent and increasingly accepted method for inspecting the suitability of data imputation.[84, 85, 130] The goal is to compare the distributions of observed and imputed data conditional on the missingness probability. Under the missing at random (MAR) assumption, the conditional distributions of the observed and missing data should be similar if the assumed model for creating multiple imputations has a good fit. To do this, we first estimate the probability of each record being incomplete (i.e., “response propensity”) in the presence of missing data by conditioning on the response indicators as well as the observed covariates. The probabilities are then averaged over the imputed datasets to obtain stability. Supplementary Figure 3 plots BMI, education category and menstrual status against the propensity score in each dataset. The distributions of the blue

and red points are match up well without significant discrepancies (e.g., mismatch in patterns, imputed data systematically shifted toward one side of the axis).

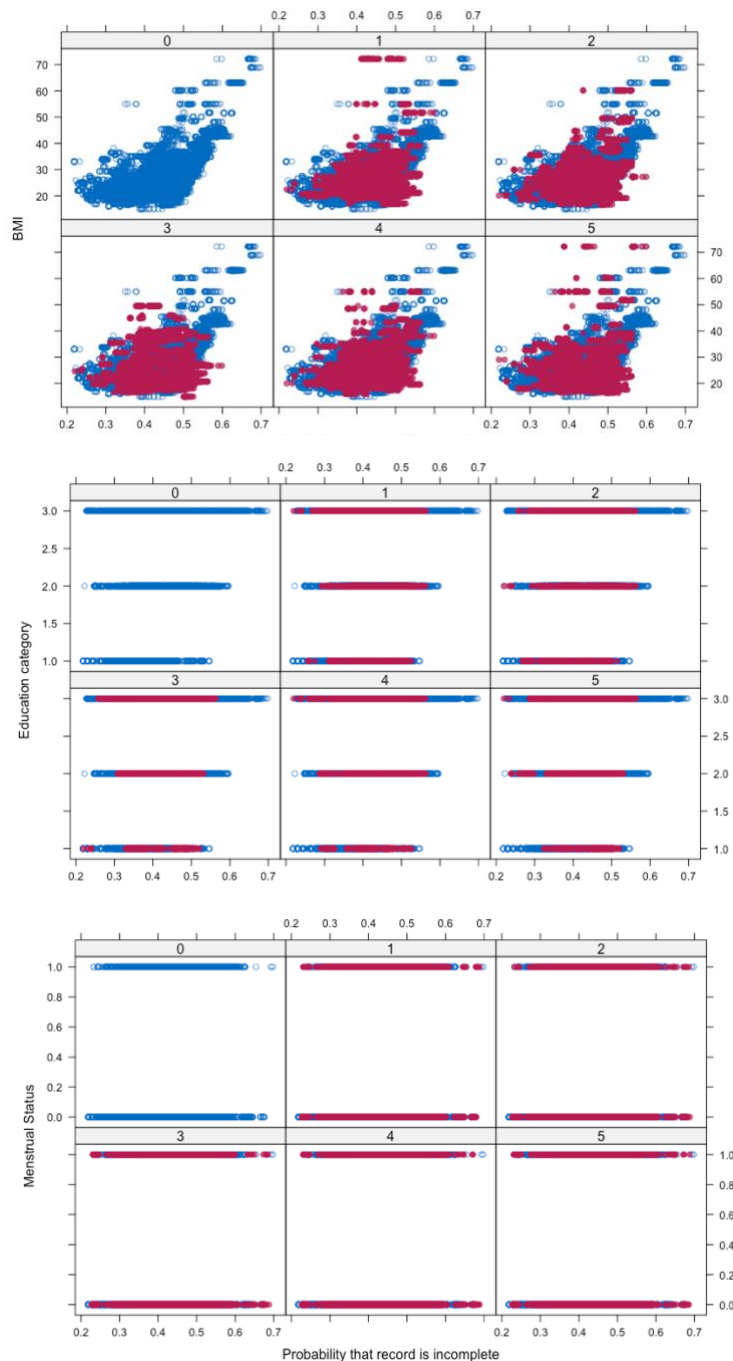

Supplementary Figure 5. BMI (top), education category (middle) and menstrual status (bottom) plotted against the propensity score in each dataset (0=observed, 1-5=imputed). The distributions of the blue (observed) and red (imputed) points are follow similar patterns.

Supplementary Table 2. Post-hoc analyses with endometriosis diagnosis included as a covariate. Conditional model results of the negative binomial model estimation of day-level total pain score (N=608).

| <b>Random Effects</b>                                | <b>Variance (95% CI)</b> |                |
|------------------------------------------------------|--------------------------|----------------|
| Participant (Intercept)                              | 1.10 (0.99, 1.22)        |                |
| <b>Fixed Effects</b>                                 | <b>Log Odds (SE)</b>     | <b>z-score</b> |
| Intercept                                            | 1.37*** (0.12)           | 10.97          |
| Menstrual Status                                     | 0.25*** (0.01)           | 21.40          |
| Previous day Pain                                    | 0.02*** (0.01)           | 21.40          |
| Body Mass Index                                      | 0.01* (0.004)            | 2.81           |
| Mean weekly Exercise Frequency                       | -0.06** (0.02)           | -3.01          |
| Previous day exercise                                | 0.09** (0.02)            | 3.85           |
| Clinician diagnosis of endometriosis                 | -0.07 (0.10)             | 0.01           |
| Self-diagnosis of endometriosis                      | -0.11 (0.11)             | -1.01          |
| Some college education level                         | 0.22 (0.13)              | -1.63          |
| College or higher education level                    | -0.01 (0.12)             | -0.12          |
| Mean weekly Exercise Frequency*Previous day exercise | -0.03*** (0.01)          | -3.42          |

SE=Standard Error. \*p=0.001, \*\* p <0.001, \*\*\*p<0.0001. B coefficients are rate ratios. BMI =Body Mass Index. BMI and previous day pain were group mean centered.

Supplementary Table 3. Post-hoc analyses with endometriosis diagnosis included as a covariate. Conditional model results of the regression model estimation of pain score difference (N=1009).

| <b>Conditional Random Effects</b> | <b>Variance (95% CI)</b> |  |
|-----------------------------------|--------------------------|--|
| Participant (Intercept)           | 13.34 (12.09, 14.93)     |  |

  

| <b>Fixed Effects</b>                                 | <b>B coefficient (SE)</b> | <b>z-score</b> |
|------------------------------------------------------|---------------------------|----------------|
| Intercept                                            | 2.45*** (0.46)            | 5.22           |
| Menstrual status                                     | 1.46*** (0.08)            | 16.98          |
| Previous day pain                                    | -0.86*** (0.01)           | -144.11        |
| Body mass index                                      | 0.07* (0.01)              | 4.47           |
| Mean weekly exercise frequency                       | -0.27** (0.09)            | -3.03          |
| Previous day exercise                                | 0.92*** (0.18)            | 5.13           |
| Clinician diagnosis of endometriosis                 | -0.05 (0.32)              | -0.16          |
| Self-diagnosis of endometriosis                      | -0.45 (0.43)              | -1.29          |
| Some college education level                         | -0.30 (0.51)              | -0.58          |
| College or higher education level                    | -1.72** (0.47)            | -3.67          |
| Mean weekly exercise frequency*Previous day exercise | -0.14* (0.06)             | -2.31          |

SE=Standard Error. \*p<0.05, \*\* p <0.01, \*\*\*p<0.0001. Body Mass Index and previous day pain were group mean centered.

1  
2  
3  
4  
5  
6  
7  
8  
9  
10  
11  
12  
13  
14  
15  
16  
17  
18  
19  
20  
21  
22  
23  
24  
25  
26  
27  
28  
29  
30  
31  
32  
33  
34  
35  
36  
37  
38  
39  
40  
41  
42  
43  
44  
45  
46  
47  
48  
49  
50  
51  
52  
53  
54  
55  
56  
57  
58  
59  
60

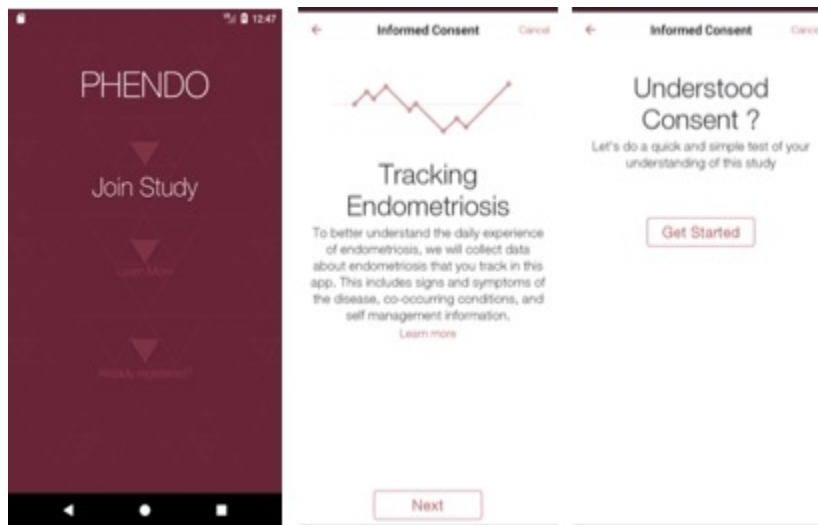

34x22mm (300 x 300 DPI)

1  
2  
3  
4  
5  
6  
7  
8  
9  
10  
11  
12  
13  
14  
15  
16  
17  
18  
19  
20  
21  
22  
23  
24  
25  
26  
27  
28  
29  
30  
31  
32  
33  
34  
35  
36  
37  
38  
39  
40  
41  
42  
43  
44  
45  
46  
47  
48  
49  
50  
51  
52  
53  
54  
55  
56  
57  
58  
59  
60

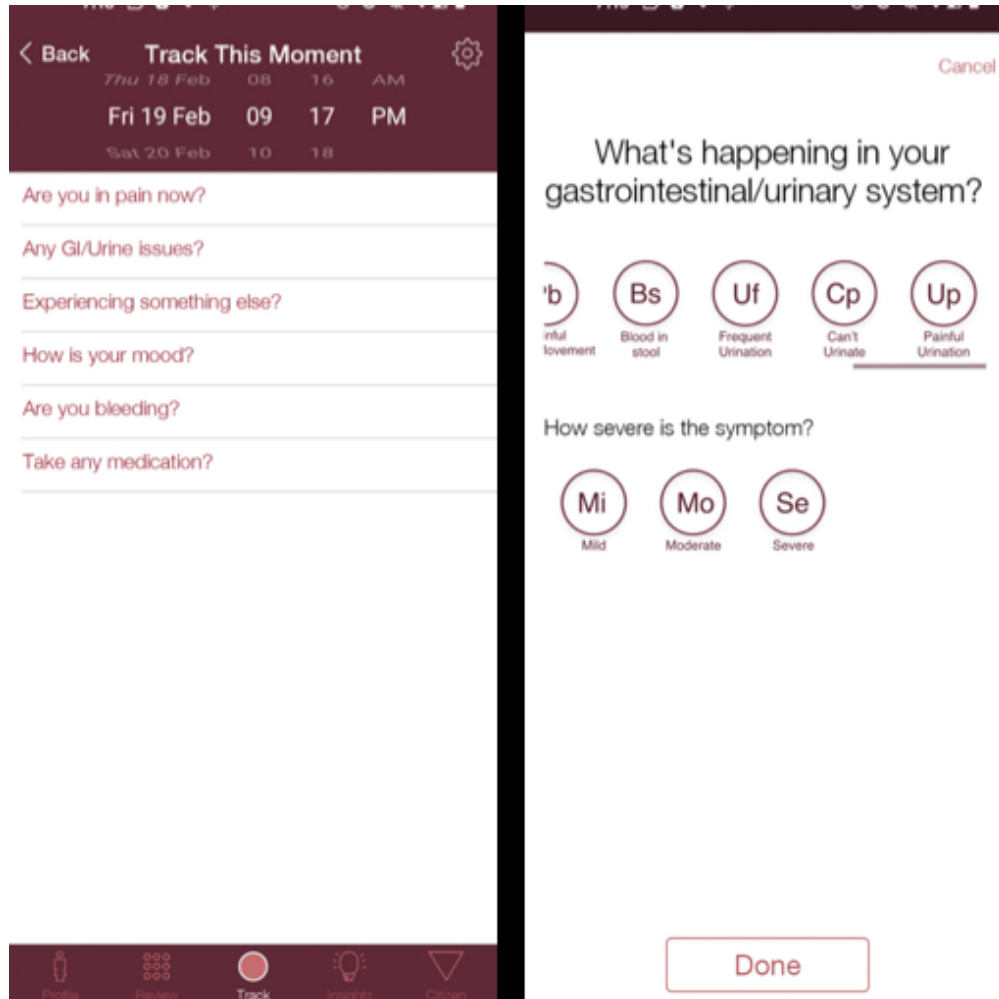

109x109mm (118 x 118 DPI)

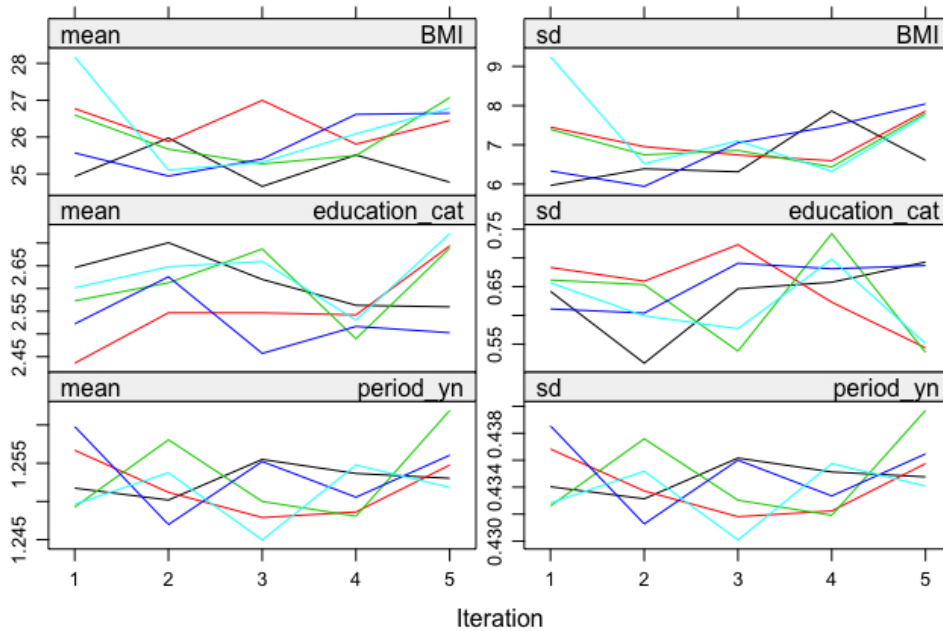

142x99mm (118 x 118 DPI)



1  
2  
3  
4  
5  
6  
7  
8  
9  
10  
11  
12  
13  
14  
15  
16  
17  
18  
19  
20  
21  
22  
23  
24  
25  
26  
27  
28  
29  
30  
31  
32  
33  
34  
35  
36  
37  
38  
39  
40  
41  
42  
43  
44  
45  
46  
47  
48  
49  
50  
51  
52  
53  
54  
55  
56  
57  
58  
59  
60

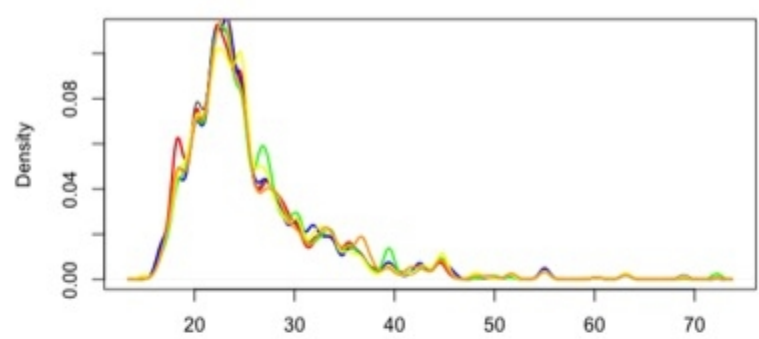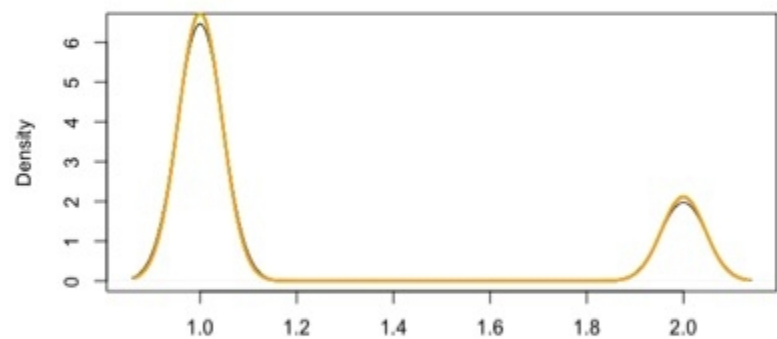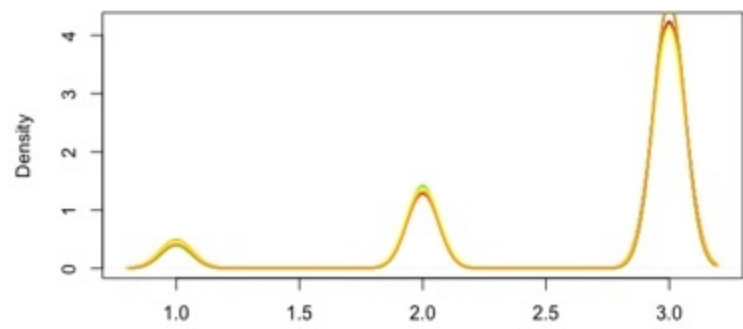

34x45mm (300 x 300 DPI)

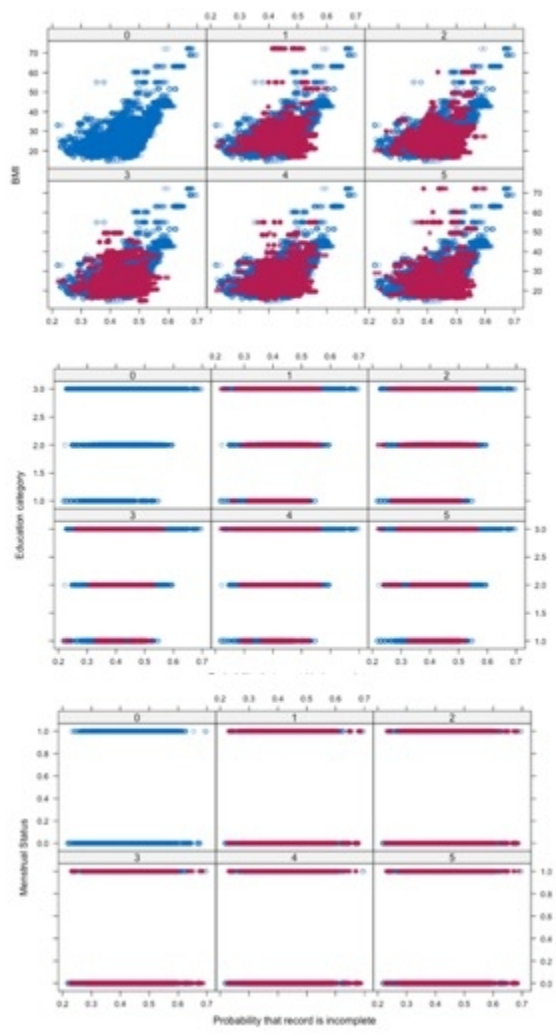

23x44mm (300 x 300 DPI)

## STROBE Statement—checklist of items that should be included in reports of observational studies

|                           | Item No. | Recommendation                                                                                                                                                                                                                                                                                                                                                                                                                                                         | Page # where this item is located: |
|---------------------------|----------|------------------------------------------------------------------------------------------------------------------------------------------------------------------------------------------------------------------------------------------------------------------------------------------------------------------------------------------------------------------------------------------------------------------------------------------------------------------------|------------------------------------|
| <b>Title and abstract</b> | 1        | (a) Indicate the study's design with a commonly used term in the title or the abstract                                                                                                                                                                                                                                                                                                                                                                                 | 2                                  |
|                           |          | (b) Provide in the abstract an informative and balanced summary of what was done and what was found                                                                                                                                                                                                                                                                                                                                                                    | 2                                  |
| <b>Introduction</b>       |          |                                                                                                                                                                                                                                                                                                                                                                                                                                                                        |                                    |
| Background/rationale      | 2        | Explain the scientific background and rationale for the investigation being reported                                                                                                                                                                                                                                                                                                                                                                                   | 3-5                                |
| Objectives                | 3        | State specific objectives, including any prespecified hypotheses                                                                                                                                                                                                                                                                                                                                                                                                       | 6                                  |
| <b>Methods</b>            |          |                                                                                                                                                                                                                                                                                                                                                                                                                                                                        |                                    |
| Study design              | 4        | Present key elements of study design early in the paper                                                                                                                                                                                                                                                                                                                                                                                                                | 6                                  |
| Setting                   | 5        | Describe the setting, locations, and relevant dates, including periods of recruitment, exposure, follow-up, and data collection                                                                                                                                                                                                                                                                                                                                        | 6-7                                |
| Participants              | 6        | (a) <i>Cohort study</i> —Give the eligibility criteria, and the sources and methods of selection of participants. Describe methods of follow-up<br><i>Case-control study</i> —Give the eligibility criteria, and the sources and methods of case ascertainment and control selection. Give the rationale for the choice of cases and controls<br><i>Cross-sectional study</i> —Give the eligibility criteria, and the sources and methods of selection of participants | 6-7                                |
|                           |          | (b) <i>Cohort study</i> —For matched studies, give matching criteria and number of exposed and unexposed                                                                                                                                                                                                                                                                                                                                                               | N/A                                |

|                              |    |                                                                                                                                                                                      |      |
|------------------------------|----|--------------------------------------------------------------------------------------------------------------------------------------------------------------------------------------|------|
|                              |    | <i>Case-control study</i> —For matched studies, give matching criteria and the number of controls per case                                                                           |      |
| Variables                    | 7  | Clearly define all outcomes, exposures, predictors, potential confounders, and effect modifiers. Give diagnostic criteria, if applicable                                             | 7-10 |
| Data sources/<br>measurement | 8* | For each variable of interest, give sources of data and details of methods of assessment (measurement). Describe comparability of assessment methods if there is more than one group | 7-10 |
| Bias                         | 9  | Describe any efforts to address potential sources of bias                                                                                                                            | 6-8  |
| Study size                   | 10 | Explain how the study size was arrived at                                                                                                                                            | 6-7  |

Continued on next page

|    |                  |     |                                                                                                                                                                                                              |                             |
|----|------------------|-----|--------------------------------------------------------------------------------------------------------------------------------------------------------------------------------------------------------------|-----------------------------|
| 1  |                  |     |                                                                                                                                                                                                              |                             |
| 2  | Quantitative     | 11  | Explain how quantitative variables were handled in the analyses. If applicable, describe which groupings were chosen and why                                                                                 | 8-10                        |
| 3  | variables        |     |                                                                                                                                                                                                              |                             |
| 4  | Statistical      | 12  | (a) Describe all statistical methods, including those used to control for                                                                                                                                    | 11-12                       |
| 5  | methods          |     | confounding                                                                                                                                                                                                  |                             |
| 6  |                  |     | (b) Describe any methods used to examine subgroups and interactions                                                                                                                                          | 11-12                       |
| 7  |                  |     | (c) Explain how missing data were addressed                                                                                                                                                                  | 12, Supplemental Files 1-2  |
| 8  |                  |     | (d) <i>Cohort study</i> —If applicable, explain how loss to follow-up was addressed                                                                                                                          | 11-12                       |
| 9  |                  |     | <i>Case-control study</i> —If applicable, explain how matching of cases and controls was addressed                                                                                                           |                             |
| 10 |                  |     | <i>Cross-sectional study</i> —If applicable, describe analytical methods taking account of sampling strategy                                                                                                 |                             |
| 11 |                  |     | (e) Describe any sensitivity analyses                                                                                                                                                                        | 12, and Supplemental Tables |
| 12 |                  |     |                                                                                                                                                                                                              |                             |
| 13 |                  |     |                                                                                                                                                                                                              |                             |
| 14 |                  |     |                                                                                                                                                                                                              |                             |
| 15 |                  |     |                                                                                                                                                                                                              |                             |
| 16 |                  |     |                                                                                                                                                                                                              |                             |
| 17 |                  |     |                                                                                                                                                                                                              |                             |
| 18 | <b>Results</b>   |     |                                                                                                                                                                                                              |                             |
| 19 | Participants     | 13* | (a) Report numbers of individuals at each stage of study—eg numbers potentially eligible, examined for eligibility, confirmed eligible, included in the study, completing follow-up, and analysed            | 13                          |
| 20 |                  |     | (b) Give reasons for non-participation at each stage                                                                                                                                                         | 6, 13                       |
| 21 |                  |     | (c) Consider use of a flow diagram                                                                                                                                                                           | N/A                         |
| 22 |                  |     |                                                                                                                                                                                                              |                             |
| 23 |                  |     |                                                                                                                                                                                                              |                             |
| 24 |                  |     |                                                                                                                                                                                                              |                             |
| 25 | Descriptive data | 14* | (a) Give characteristics of study participants (eg demographic, clinical, social) and information on exposures and potential confounders                                                                     | 13, and Table 1             |
| 26 |                  |     | (b) Indicate number of participants with missing data for each variable of interest                                                                                                                          | 13, Table 1                 |
| 27 |                  |     | (c) <i>Cohort study</i> —Summarise follow-up time (eg, average and total amount)                                                                                                                             | N/A                         |
| 28 |                  |     |                                                                                                                                                                                                              |                             |
| 29 |                  |     |                                                                                                                                                                                                              |                             |
| 30 | Outcome data     | 15* | <i>Cohort study</i> —Report numbers of outcome events or summary measures over time                                                                                                                          | N/A                         |
| 31 |                  |     | <i>Case-control study</i> —Report numbers in each exposure category, or summary measures of exposure                                                                                                         | N/A                         |
| 32 |                  |     | <i>Cross-sectional study</i> —Report numbers of outcome events or summary measures                                                                                                                           | 13,14                       |
| 33 |                  |     |                                                                                                                                                                                                              |                             |
| 34 |                  |     |                                                                                                                                                                                                              |                             |
| 35 |                  |     |                                                                                                                                                                                                              |                             |
| 36 |                  |     |                                                                                                                                                                                                              |                             |
| 37 |                  |     |                                                                                                                                                                                                              |                             |
| 38 | Main results     | 16  | (a) Give unadjusted estimates and, if applicable, confounder-adjusted estimates and their precision (eg, 95% confidence interval). Make clear which confounders were adjusted for and why they were included | 14, Tables 2 and 3          |
| 39 |                  |     |                                                                                                                                                                                                              |                             |
| 40 |                  |     |                                                                                                                                                                                                              |                             |
| 41 |                  |     |                                                                                                                                                                                                              |                             |
| 42 |                  |     |                                                                                                                                                                                                              |                             |
| 43 |                  |     |                                                                                                                                                                                                              |                             |
| 44 |                  |     |                                                                                                                                                                                                              |                             |
| 45 |                  |     |                                                                                                                                                                                                              |                             |
| 46 |                  |     |                                                                                                                                                                                                              |                             |

|                                                                                                                  |       |
|------------------------------------------------------------------------------------------------------------------|-------|
| (b) Report category boundaries when continuous variables were categorized                                        | 14-15 |
| (c) If relevant, consider translating estimates of relative risk into absolute risk for a meaningful time period | N/A   |

Continued on next page

For peer review only

1  
2  
3  
4  
5  
6  
7  
8  
9  
10  
11  
12  
13  
14  
15  
16  
17  
18  
19  
20  
21  
22  
23  
24  
25  
26  
27  
28  
29  
30  
31  
32  
33  
34  
35  
36  
37  
38  
39  
40  
41  
42  
43  
44  
45  
46

|                          |    |                                                                                                                                                                            |                                |
|--------------------------|----|----------------------------------------------------------------------------------------------------------------------------------------------------------------------------|--------------------------------|
| Other analyses           | 17 | Report other analyses done—eg analyses of subgroups and interactions, and sensitivity analyses                                                                             | 14-15, and Supplemental Tables |
| <b>Discussion</b>        |    |                                                                                                                                                                            |                                |
| Key results              | 18 | Summarise key results with reference to study objectives                                                                                                                   | 16                             |
| Limitations              | 19 | Discuss limitations of the study, taking into account sources of potential bias or imprecision. Discuss both direction and magnitude of any potential bias                 | 21-22                          |
| Interpretation           | 20 | Give a cautious overall interpretation of results considering objectives, limitations, multiplicity of analyses, results from similar studies, and other relevant evidence | 16-19                          |
| Generalisability         | 21 | Discuss the generalisability (external validity) of the study results                                                                                                      | 21,22                          |
| <b>Other information</b> |    |                                                                                                                                                                            |                                |
| Funding                  | 22 | Give the source of funding and the role of the funders for the present study and, if applicable, for the original study on which the present article is based              | 23                             |

# BMJ Open

## An Observational Study of Exercise and Pain Patterns in Endometriosis via Mobile Self-Tracking

|                                 |                                                                                                                                                                                                                                                                                                                                                                  |
|---------------------------------|------------------------------------------------------------------------------------------------------------------------------------------------------------------------------------------------------------------------------------------------------------------------------------------------------------------------------------------------------------------|
| Journal:                        | <i>BMJ Open</i>                                                                                                                                                                                                                                                                                                                                                  |
| Manuscript ID                   | bmjopen-2021-059280.R1                                                                                                                                                                                                                                                                                                                                           |
| Article Type:                   | Original research                                                                                                                                                                                                                                                                                                                                                |
| Date Submitted by the Author:   | 26-Apr-2022                                                                                                                                                                                                                                                                                                                                                      |
| Complete List of Authors:       | Ensari, Ipek; Columbia University, Data Science Institute<br>Lipsky-Gorman, Sharon; Columbia University, Department of Biomedical Informatics<br>Horan, Emma; Columbia University, Department of Biomedical Informatics<br>Bakken, Suzanne; Columbia University, School of Nursing<br>Elhadad, Noemie; Columbia University, Department of Biomedical Informatics |
| <b>Primary Subject Heading</b>: | Health informatics                                                                                                                                                                                                                                                                                                                                               |
| Secondary Subject Heading:      | Public health                                                                                                                                                                                                                                                                                                                                                    |
| Keywords:                       | PAIN MANAGEMENT, Health informatics < BIOTECHNOLOGY & BIOINFORMATICS, PREVENTIVE MEDICINE, EPIDEMIOLOGY, COMPLEMENTARY MEDICINE                                                                                                                                                                                                                                  |
|                                 |                                                                                                                                                                                                                                                                                                                                                                  |

SCHOLARONE™  
Manuscripts



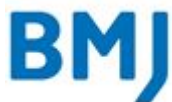

I, the Submitting Author has the right to grant and does grant on behalf of all authors of the Work (as defined in the below author licence), an exclusive licence and/or a non-exclusive licence for contributions from authors who are: i) UK Crown employees; ii) where BMJ has agreed a CC-BY licence shall apply, and/or iii) in accordance with the terms applicable for US Federal Government officers or employees acting as part of their official duties; on a worldwide, perpetual, irrevocable, royalty-free basis to BMJ Publishing Group Ltd ("BMJ") its licensees and where the relevant Journal is co-owned by BMJ to the co-owners of the Journal, to publish the Work in this journal and any other BMJ products and to exploit all rights, as set out in our [licence](#).

The Submitting Author accepts and understands that any supply made under these terms is made by BMJ to the Submitting Author unless you are acting as an employee on behalf of your employer or a postgraduate student of an affiliated institution which is paying any applicable article publishing charge ("APC") for Open Access articles. Where the Submitting Author wishes to make the Work available on an Open Access basis (and intends to pay the relevant APC), the terms of reuse of such Open Access shall be governed by a Creative Commons licence – details of these licences and which [Creative Commons](#) licence will apply to this Work are set out in our licence referred to above.

Other than as permitted in any relevant BMJ Author's Self Archiving Policies, I confirm this Work has not been accepted for publication elsewhere, is not being considered for publication elsewhere and does not duplicate material already published. I confirm all authors consent to publication of this Work and authorise the granting of this licence.

1  
2  
3 **An Observational Study of Exercise and Pain Patterns in Endometriosis via Mobile Self-**  
4  
5 **Tracking**  
6  
7

8  
9 Running title: Daily exercise and pain patterns in endometriosis  
10  
11  
12  
13  
14

15  
16 Ipek Ensari<sup>1</sup>, PhD, Sharon Lipsky-Gorman<sup>2</sup>, MA, Emma Horan<sup>2</sup>, BS, Suzanne R. Bakken<sup>3</sup>, PhD,  
17  
18 FAAN, Noémie Elhadad<sup>2</sup>, PhD  
19

20  
21 <sup>1</sup>Data Science Institute, Columbia University, <sup>2</sup>Department of Biomedical Informatics, Columbia  
22  
23 University Irving Medical Center, <sup>3</sup>Columbia University School of Nursing, New York, NY  
24  
25  
26  
27  
28  
29

30  
31 **Author of Correspondence:**

32 Ipek Ensari  
33 Columbia University  
34 Data Science Institute  
35 475 Riverside Dr, Room 320,  
36 New York, NY 10115  
37 Email:ie2145@columbia.edu  
38  
39  
40  
41  
42  
43  
44  
45  
46  
47  
48  
49  
50  
51  
52  
53  
54  
55  
56  
57  
58  
59  
60

**Word count:** 4,490

1  
2  
3  
4  
5  
6  
7  
8  
9  
10  
11  
12  
13  
14  
15  
16  
17  
18  
19  
20  
21  
22  
23  
24  
25  
26  
27  
28  
29  
30  
31  
32  
33  
34  
35  
36  
37  
38  
39  
40  
41  
42  
43  
44  
45  
46  
47  
48  
49  
50  
51  
52  
53  
54  
55  
56  
57  
58  
59  
60

**Abstract**

For peer review only

1  
2  
3 **Objectives:** This study investigates the association of daily physical exercise with pain  
4 symptoms in endometriosis. We also examined whether an individual's typical weekly (i.e.,  
5 habitual) exercise frequency influences (i.e., moderates) the relationship between their pain  
6 symptoms on a given day (day  $t$ ) and previous-day (day  $t-1$ ) exercise. **Participants:** The sample  
7 included 90,382 days of data from 1,009 participants (~85% non-Hispanic white) living with  
8 endometriosis across 38 countries. **Study Design:** This was an observational, retrospective study  
9 conducted using data from a research mobile app (Phendo) designed for collecting self-reported  
10 data on symptoms and self-management of endometriosis. **Primary Outcome Measures:** The  
11 two primary outcomes were the composite day-level pain score that includes pain intensity and  
12 location, and the change in this score from previous day ( $\Delta$ -score). We applied generalized linear  
13 mixed-level models to examine the effect of previous-day exercise and habitual exercise  
14 frequency on these outcomes. We included an interaction term between the 2 predictors to assess  
15 the moderation effect, and adjusted for previous-day pain, menstrual status, education level, and  
16 body mass index. **Results:** The association of previous-day (day  $t-1$ ) exercise to pain symptoms  
17 on day  $t$  was moderated by habitual exercise frequency, independent of covariates (Rate  
18 ratio=0.96, 95% CI=0.95, 0.98,  $p=0.0007$  for day-level pain score,  $B=-0.14$ , 95%CI=-0.26, -  
19 0.016,  $p=0.026$  for  $\Delta$ -score). Those who regularly engaged in exercise at least 3 times per week  
20 were more likely to experience favorable pain outcomes after having a bout of exercise on the  
21 previous day. **Conclusions:** Regular exercise might influence the day-level (i.e., short-term)  
22 association of pain symptoms to exercise. These findings can inform exercise recommendations  
23 for endometriosis pain management, especially for those who are at greater risk for lack of  
24 regular exercise due to acute exacerbations in their pain after exercise.  
25  
26  
27  
28  
29  
30  
31  
32  
33  
34  
35  
36  
37  
38  
39  
40  
41  
42  
43  
44  
45  
46  
47  
48  
49  
50  
51  
52  
53  
54  
55  
56  
57  
58  
59  
60

1  
2  
3  
4  
5  
6  
7  
8  
9  
10  
11  
12  
13  
14  
15  
16  
17  
18  
19  
20  
21  
22  
23  
24  
25  
26  
27  
28  
29  
30  
31  
32  
33  
34  
35  
36  
37  
38  
39  
40  
41  
42  
43  
44  
45  
46  
47  
48  
49  
50  
51  
52  
53  
54  
55  
56  
57  
58  
59  
60

For peer review only

### Strengths and limitations of this study

- This study leverages data from a research mobile app (Phendo) designed for collecting self-reported data on symptoms and self-management of endometriosis.
- Daily exercise and pain symptom patterns in endometriosis is investigated under ecologically-valid conditions.
- The participant sample (N=1,009) represents 38 countries, ages across the reproductive life span, and various person-level characteristics.
- The study is limited by self-reported data collection by somewhat consistent trackers and lacks details on duration or intensity of exercise to evaluate as potential moderators.
- Participants consisted of mostly white, non-Hispanic individuals, therefore results might not be generalizable to other demographic groups.

## INTRODUCTION

Exercise, a subset of physical activity (PA) that is planned, structured, repetitive, and intended to improve or maintain physical fitness, is an important component of effective pain management (i.e., reduction and prevention of pain symptoms).[1, 2] Both acute (i.e., single bout/session) and chronic (i.e., repeated bouts/sessions over time) exercise training have been demonstrated to improve numerous pain-related conditions. [1, 3-7] However, pain-related responses to exercise appear to be variable in populations with chronic pain conditions.[8] Similarly, exacerbation of pain with exercise could pose a barrier to regular exercise in such individuals, thus increasing resistance to exercising, which in return can worsen pain, related disability, and risk for co-morbidities.[9-11] Investigation into the naturally-occurring pattern of pain symptoms associated with exercise behavior can help inform the design of exercise-based therapies for targeting disease-related pain symptoms.

Individuals with endometriosis may benefit from such an investigations for several reasons.[12-14] Endometriosis is a systemic, estrogen-dependent inflammatory condition characterized primarily by chronic pelvic and abdominal pain, pain with sexual intercourse, and infertility.[15, 16] It significantly impacts daily function and quality of life (QoL)[17, 18], contributing to a productivity loss of 6.3 hours/week[19] and an estimated \$69.4 billion in excess health expenditures annually in the United States.[20] Existing medical and hormonal therapies have limited efficacy on pain management, often confounded by side effects.[21] Opioids and other analgesics are commonly prescribed for long-term use,[22, 23] despite treatment guidelines recommending use of nonpharmacologic therapies including PA.[24] Consequently, there is a critical need to identify alternative approaches for endometriosis pain management.

1  
2  
3 One such approach is exercise, based on various mechanisms proposed in the  
4 literature[25] that might pertain to endometriosis. These include regulation of the serotonergic  
5 and opioid receptors,[26] reduction of inflammatory markers associated with pain,[27, 28] and  
6 effect of exercise on nerve growth factor expression that is associated with the painful  
7 endometriosis lesions.[29, 30] Exercise can increase pain management self-efficacy, which is  
8 associated with improved pain outcomes and QoL for individuals with chronic pain.[31] While  
9 the evidence on exercise for pain management is promising [4, 32, 33], existing data are scarce,  
10 cross-sectional, and indicate variable effects on pain outcomes.[33-37] Despite these limitations,  
11 previous reports of exercise-induced adaptations to pain stimuli through increased pain threshold  
12 suggest that the regularity with which an individual engages in exercise over the long term (i.e.,  
13 habitual exercise frequency) might influence (i.e., moderate) the relationship between their day-  
14 level exercise and pain symptoms.[38, 39] Among regular exercisers, pain-related activation has  
15 been demonstrated in the brain's descending antinociceptive pathway, with corresponding  
16 reductions in self-reported pain after acute bouts of at least moderate intensity exercise.[40]  
17 Moreover, studies report that habitual exercise frequency moderates a variety of self-reported  
18 outcomes (e.g., mood, anxiety, fatigue) in response to acute exercise.[41-43] While these  
19 findings are promising, their generalizability are limited by sample characteristics, laboratory-  
20 based experimental pain stimuli and exercise manipulations, and brief measurement duration of  
21 up to several hours. Thus, further investigation is needed to examine the relationship between  
22 pain symptoms and exercise behavior with a representative sample, under ecologically valid  
23 conditions, while accounting for possible between-individual variability and temporal lags in the  
24 outcome that extend beyond several hours.  
25  
26  
27  
28  
29  
30  
31  
32  
33  
34  
35  
36  
37  
38  
39  
40  
41  
42  
43  
44  
45  
46  
47  
48  
49  
50  
51  
52  
53  
54  
55  
56  
57  
58  
59  
60



1  
2  
3 Accordingly, this study examines the naturally-occurring daily patterns of pain symptoms  
4 and exercise behavior in endometriosis. We leverage mobile self-tracking, a particularly useful  
5 approach for capturing ecologically valid profiles of the dynamic temporal fluctuations and  
6 between-individual variability in pain over time.[44] We primarily aim to delineate the degree to  
7 which an individual's typical weekly exercise frequency (i.e., habitual exercise) influences (i.e.,  
8 moderates) the association of their pain symptoms on a given day (day  $t$ ) to their previous-day  
9 (day  $t-1$ ) exercise behavior (i.e., lagged-day effects). Given the previously documented variable  
10 course of pain symptomology in endometriosis,[45] we also delineate the variability in day-to-  
11 day pain experiences within these analyses.  
12  
13  
14  
15  
16  
17  
18  
19  
20  
21  
22  
23  
24  
25

## 26 MATERIALS AND METHODS

### 27 Study Design

28  
29 Study design and protocols were approved by the Columbia University Irving Medical  
30 Center (CUIMC) Institutional Review Board (#AAAQ9812). This study was conducted with  
31 retrospective data collected through an observational research mobile app "Phendo". Phendo was  
32 designed and developed for self-tracking endometriosis symptoms and its management. It is  
33 available for iOS<sup>1</sup> and Android<sup>2</sup> in App stores for free.  
34  
35  
36  
37  
38  
39  
40  
41

### 42 Study Sample and Inclusion Criteria

43  
44 The study sample comprised Phendo users with a self-reported surgery-, clinician-, or  
45 suspected diagnosis of endometriosis and self-tracked exercise and pain data between November  
46 2016 and April 2020. All participants regardless of diagnosis type are provided the same set of  
47 measures in the App. In a previous study, the endometriosis phenotype (i.e., characterization)  
48 obtained using Phendo data was demonstrated to be consistent with both the characterization of  
49  
50  
51  
52  
53  
54  
55  
56  
57  
58  
59  
60

1  
2  
3 the disease in the literature based on standard clinical surveys and with clinician (i.e., human  
4 expert) evaluations.[46] We a priori decided to include all participants who selected one of the  
5 three affirmative responses in the present analyses, excluding those who indicated not having  
6 endometriosis. Out of the initial eligible pool of 9,792 Phendo users with reported endometriosis,  
7 7,949 had at least one day of tracking of the variables of interest for the study. Of these, 1,009  
8 users had sufficient amount of data on pain and exercise for analysis (See *Data Analysis*) and  
9 thus were included in the study.  
10  
11  
12  
13  
14  
15  
16  
17  
18

### 19 **Recruitment and Informed Consent**

20  
21 Study participants were passively recruited through one of the App stores, engagement on  
22 study social media sites, or word-of-mouth. Upon downloading Phendo, all potential users go  
23 through an informed consent and enrollment process before tracking any data. First, they are  
24 provided with an explanation of the App, its overall purpose and link to its website  
25 (citizenendo.org) which includes etailed information and instructional videos for using the App.  
26 Participants complete a brief “verify your understanding” quiz to ensure their comprehension of  
27 how their data might be used for research purposes, anonymity and confidentiality (See  
28 Supplementary Figures 1-2 for example screenshots). This is followed by formal electronic  
29 informed consent (and assent for individuals 13-18 years old), a copy of which is sent to the  
30 participant. Once enrolled, users are instructed to track daily, but they are free to track as much  
31 or as sporadically as they wish, and they do not receive any prompts or requests to track a  
32 specific variable from the research team. Findings from a previous study evaluating recruitment  
33 and retention patterns within Phendo and seven other similar self-tracking apps indicated that  
34 Phendo’s engagement was similar to standard engagement patterns in research smartphone  
35  
36  
37  
38  
39  
40  
41  
42  
43  
44  
45  
46  
47  
48  
49  
50  
51  
52  
53  
54  
55  
56  
57  
58  
59  
60

1  
2  
3 apps.[47] Participants in the current study did not receive financial compensation for their  
4 tracking activities.  
5  
6

### 7 **Patient and Public Involvement**

8  
9  
10 Measures in Phendo were developed using patient-centered participatory design, through  
11 qualitative (focus groups, interviews) and quantitative research (surveys, coded content analysis)  
12 with participants with endometriosis, described in detail elsewhere.[48, 49] Studies suggest that  
13 this technique for developing patient-reported outcome measures enhances content validity and  
14 relevance of the measure to the target population, thus providing a more comprehensive and  
15 accurate representation of the disease under study.[50-53]  
16  
17  
18  
19  
20  
21  
22

### 23 **Study Measures**

24  
25  
26 *Day-level Pain.* We assessed day-level pain through multiple items within Phendo: 1.  
27 “Are you in pain now? Where is the pain?”, 2. “Any gastrointestinal or urinary issues?” (painful  
28 urination (dysuria), painful bowel movement (dyschezia)). Similar to pain documentation in  
29 clinical records and other measures such as the McGill Pain Scale,[54] Phendo users can select  
30 location from all areas of the body (20 available choices, as well as right/left and  
31 upper/middle/lower specification), and can be mapped onto a visual, analogous to the McGill  
32 Pain Scale. Phendo users rate severity for each affirmative response on a 3-point categorical  
33 scale (mild, moderate, or severe), analogous to other commonly used pain rating scales in the  
34 literature.[55, 56] This categorization has been used for standardization and comparisons across  
35 different pain measures, and demonstrated superior ability to capture the nonlinear relationship  
36 between reported pain severity and interference with activity than use of numbers.[57, 58]  
37  
38  
39  
40  
41  
42  
43  
44  
45  
46  
47  
48  
49  
50

51 While mHealth studies have examined the validity, utility and specificity for various pain  
52 conditions[58-60] of their pain measurement approaches, a standard “all-in-one” single outcome  
53  
54  
55  
56  
57  
58  
59

1  
2  
3 that captures the multi-dimensional pain experience across different populations remains to be  
4 established.[61, 62] Thus, composite pain computations have been proposed.[63] We computed a  
5  
6 heuristic, composite day-level pain score to capture participants' conceptualization of their pain  
7  
8 experience by summing the severity scores reported for each body area (e.g., moderate pain in  
9  
10 abdomen, mild pains in chest and leg would yield  $2+1+1=4$  as the total score).[45] To account  
11  
12 for and circumvent any potential pain rumination/catastrophizing [62, 64] and varying tracking  
13  
14 habits among participants, the score was computed based on the unique reports of area-severity  
15  
16 pairs per day for each participant (e.g., if a participant tracked mild abdominal pain three times in  
17  
18 a day, this abdomen-mild pair is counted toward the daily pain score only once). This score was  
19  
20 the foundation of two study outcome variables: 1) total day-level pain score, and 2) difference in  
21  
22 day-level pain score from previous day to the next (i.e.,  $t-(t-1)$ ). The latter captures additional  
23  
24 nuances in the data, enabling analyses to distinguish between participants with overall high day-  
25  
26 level pain scores over time and experience a post-exercise reduction in pain versus those with  
27  
28 low pain scores and who not experience a post-exercise reduction in pain. In the current study  
29  
30 sample, the composite pain scores were moderately correlated with scores from other standard  
31  
32 pain measures (e.g.,  $r=0.36$ ,  $p<0.0001$  with the Pelvic-Abdominal Pain Visual Analog Scale  
33  
34 (VAS);  $r=-0.46$ ,  $p<0.0001$  with Medical Outcomes Study 36-item Health Survey (SF-36) Bodily  
35  
36 Pain subscale).

37  
38  
39  
40  
41  
42  
43  
44 *Day-level and habitual exercise.* Phendo users track their daily exercise through  
45  
46 responding to a root question "Did you exercise today? (Yes/No)". Upon selecting a "Yes", users  
47  
48 can further customize their entry within this item by adding exercise details through unrestricted  
49  
50 free-text responses. We used responses to the root item to compute day-level and mean weekly  
51  
52 exercise frequency (i.e., habitual exercise) for each participant. We calculated the latter by  
53  
54  
55  
56  
57  
58  
59  
60

1  
2  
3 summing the number of exercise reports tracked per week across the range of days of data and  
4 then dividing this number by the total number of weeks of data. We used free-text responses to  
5  
6 categorize exercises by modality and to validate that entries were exercise-related. Any non-  
7  
8 exercise activity (e.g., sleep, meditate, sitting, socialize) was recoded as a no exercise in the  
9  
10 analytic data set. This day-level exercise assessment aims to increase ecological validity[50, 65]  
11  
12 and reduce the likelihood of low test-retest reliability and inaccuracy due to recall bias.[66]  
13  
14 Similar mHealth measures of daily PA and exercise have been used by others[67-69] who  
15  
16 reported concordance with accelerometer-based measures,[70] and higher correlations than self-  
17  
18 report methods with accelerometer measures.[67, 68] We evaluated the validity of the scores  
19  
20 from the Phendo exercise item through a series of analyses with the study sample [71] Results  
21  
22 supported its concurrency with other self-reported recall-based measures (i.e., kendall's  $\tau=0.256$ ,  
23  
24  $p<0.001$  with Exercise Vital Sign[72] and  $\tau=0.294$ ,  $p=0.001$  with accelerometers;  $B=18.73$ ,  
25  
26  $p=0.039$  in association to the Nurses' Health Study II Weekly Exercise Scale[73] scores).

27  
28  
29  
30  
31  
32  
33 *Standard Pain and Exercise Measures.* To allow comparisons of the study sample with  
34  
35 others in the literature, we report sample summary scores from the following components of the  
36  
37 World Endometriosis Research Foundation (WERF) Endometriosis Patient Questionnaire (EPQ-  
38  
39 S)[74, 75]: 1) The 2-item Bodily Pain subscale of the SF-36,[76] 2) Pelvic-abdominal Pain VAS  
40  
41 (“Please rate how severe your general pelvic/lower abdominal pain was at its worst in the last 3  
42  
43 months using the pain scale below where 0=no pain and 10=worst imaginable pain.”), and 3)  
44  
45 The 8-item Nurses' Health Study II Weekly Physical Activity Scale (NHS-II) [73]. It measures  
46  
47 self-reported weekly durations of major exercise modalities (i.e., walking, running, lap  
48  
49 swimming, jogging, bicycling, tennis, calisthenics, other aerobic recreation) in a typical week in  
50  
51 the past 12 months. These durations can further be multiplied by their metabolic equivalents  
52  
53  
54  
55  
56  
57  
58  
59  
60

(METs) based on the Compendium of PA [77] and summed to obtain the total weekly exercise-related energy expenditure (EE). We report both the total weekly minutes and EE for the sample.

## Data Analysis

*Sample Characteristics.* We characterize the study sample through frequencies (%) and means (standard deviation; SD) of demographics, self-reported pain medication use habits, and scores on the standard pain and exercise measures for those who completed the surveys. We characterize pain symptomology in the sample by describing the prevalence of self-tracked pain severities by each body area.

*Associations of pain symptoms with exercise behavior.* Using generalized linear mixed models (GLMMs), we separately estimated day-level total pain score and pain score difference as primary outcomes. Both outcomes were regressed on previous-day (day  $t-1$ ) exercise and mean weekly exercise frequency to estimate the slope of mean pain level on day  $t$  and change in pain. We included an interaction term between the 2 predictors to assess the moderation of the day-level association by each individual's mean weekly exercise frequency. We included participant as a random effect to account for between-person variability in daily pain by estimating a separate intercept for each participant. Models were further adjusted for menstrual status (binary: yes/no), previous-day (i.e., day  $t-1$ ) pain, body mass index (BMI) and education level. Race/ethnicity and age were not significantly associated with average daily pain reports ( $F=1.68$ ,  $p=0.14$  for race/ethnicity;  $r=-0.148$ ,  $p=0.07$  for age), and age was further significantly associated with education level (Kruskal-Wallis  $X^2=64.948$ ,  $p<0.0001$ ). To avoid redundancy and multicollinearity, race/ethnicity and age were not included as model covariates.

1  
2  
3 *Model Specification.* We specified a zero-inflated negative binomial (ZINB) distribution  
4  
5 when modeling the total pain outcome, as it has been demonstrated to provide the best fit for  
6  
7 outcomes with over-dispersion and zero-inflation (i.e., zeros due to both sampling and  
8  
9 missingness) [78-80]. Missing values in the BMI (22%), education level (19%) and menstrual  
10  
11 status (22%) were imputed as described in Supplementary File 1 and checked for appropriateness  
12  
13 based on convergence and marginal distributions following guidelines [81-83] (See  
14  
15 Supplementary Figures 3-5). Adequacy of imputations for valid statistical inference were  
16  
17 verified based on the recommended measures of missing data information of *fraction of missing*  
18  
19 *information* ( $\lambda$ ) and *relative increase in variance due to nonresponse* ( $r$ )[84, 85] (See  
20  
21 Supplementary File 2). Further details of the model specification are in Supplementary file 1. We  
22  
23 included participants who had at least 11 pairs of consecutive days of data in the final analytic  
24  
25 sample as this provided sufficient amount of data to 1) ensure model convergence and improve  
26  
27 reliability and accuracy of the estimates, particularly the random effects and their variances[86-  
28  
29 89], and 2) adequately infer participants' habitual exercise level by considering at least three  
30  
31 weeks' worth of tracking to compute the weekly exercise frequency. Finally as a post-hoc  
32  
33 analysis, we tested the possible influence of type of endometriosis diagnosis by including this  
34  
35 categorical variable in the 2 models described above. We conducted the data analyses using  
36  
37 R[90] and the glmmTMB package for the GLMMs.[79, 80] Statistical significance level was set  
38  
39 at  $p < 0.05$  for all analyses.  
40  
41  
42  
43  
44  
45  
46  
47  
48

## 49 RESULTS

50  
51 *Sample Characteristics.* Sample characteristics are provided in Table 1. Participants  
52  
53 (N=1,009) had on average 89.6 days of data available for analysis (SD=62.8, Range=22-841,  
54  
55  
56  
57  
58  
59  
60

1  
2  
3 IQR=31). Participants collectively represent 38 countries, with a wide age range (14-63 years),  
4 and varying education and employment status. Almost 70% (N=702) had laparoscopic  
5 confirmation of their diagnosis, 19.8% (N=200) had a clinician diagnosis, and 10.6% (N=107)  
6 had suspected endometriosis (i.e., “I think I have endometriosis (know the symptoms, no  
7 doctor)”). Scores from the VAS, SF-36, and NHS-II Scales are provided in Table 2. The overall  
8 prevalence of having used a non-prescription pain medication use was 49.35%, opioid-based  
9 medication use was reported by 11.19% of the participants, and similarly use of opioid and  
10 paracetamol/acetaminophen combination medications were reported by 11.39% of the  
11 participants (See Table 1).  
12  
13  
14  
15  
16  
17  
18  
19  
20  
21  
22  
23

24 *Pain symptom patterns.* Mean daily pain score was 4.48 (SD=7.11, 0-79). Mean person-  
25 level daily pain score (i.e., “mean of means”) was 4.82 (SD=4.57, Range=0-34). As shown in  
26 Figure 1, moderate intensity was the most frequently reported severity across all body areas  
27 (Mean=49.3%, SD=22.2), and pelvic pain was the most prevalent area, followed by back pain  
28 and gastrointestinal pain (See Figure 1).  
29  
30  
31  
32  
33  
34

35 *Habitual exercise patterns.* Mean weekly exercise frequency was 1.43/week (SD=1.54,  
36 Range=0-6.87/week, IQR=2.21), 21.3% (N=215) of the sample had an exercise frequency of at  
37 least three times per week, and 38.5% (388) of the sample did not engage in any regular exercise  
38 (i.e., <1/week). Consequently, 40.2% (N=406) of the sample had a mean exercise frequency of  
39 1-2 times per week. Prevalence of the 10 most frequently reported exercise modalities in the  
40 sample are depicted in Figure 2. Walking was the most common modality, reported by 50.94%  
41 of the participants, followed by yoga (30.82%), and muscle strength/endurance training activities  
42 (24.38%). Yoga and stretching exercises were collectively reported by almost 45% of the  
43 sample.  
44  
45  
46  
47  
48  
49  
50  
51  
52  
53  
54  
55  
56  
57  
58  
59  
60



1  
2  
3           *Association of day-level pain to exercise.* Tables 3 and 4 display results of the GLMMs  
4  
5 estimating day-level total pain score and difference. Coefficients for the model interaction terms  
6  
7 indicated a small but statistically significant moderation of previous-day exercise by habitual  
8  
9 exercise frequency (RR=0.96 for total pain score and -0.14 for pain score difference,  $p<0.05$ ; See  
10  
11 Figure 3). Further inspection of this interaction indicated a mean typical exercise frequency of ~3  
12  
13 times/week as the point after which previous-day exercise began to be associated with favorable  
14  
15 pain outcomes (e.g., a decrease from the predicted mean score) on the following day, adjusted  
16  
17 for other day-level and person-level factors (Figure 3). This suggests that, participants who  
18  
19 typically engage in exercise 3 or more times per week were more likely to report lower pain  
20  
21 score and smaller increases (or larger decreases) in pain the day after an exercise bout, compared  
22  
23 to not having exercised the previous day. On the other hand, those who exercised less frequently  
24  
25 or none were more likely to report higher levels of pain and larger increases (or smaller  
26  
27 decreases) in pain 1 day after an exercise bout compared to not having exercised the day before.  
28  
29  
30  
31  
32

33           *Variability in estimated pain scores.* There was substantial between-person variability in  
34  
35 average day-level pain scores, based on the statistically significant random effect of participant  
36  
37 in the models (See Tables 3 and 4, also depicted in Figure 4). The significance of this random  
38  
39 effect can further be quantified through a restricted likelihood ratio test (RLRT) based on  
40  
41 simulations from the model sample distribution, [91, 92] yielding an observed likelihood ratio  
42  
43 (RLRT =7183.3,  $p\text{-value} < 0.0001$ ). These collectively indicate substantial between-individual  
44  
45 variability in daily pain experience contributing to the total model pain variance.  
46  
47  
48

49           *Post-hoc analyses.* Inclusion of diagnosis type in the model did not have an influence on  
50  
51 the results based on the non-significant B coefficients ( $p=0.48$  and  $p=0.59$  for pain score and  
52  
53  $p=0.70$  and  $p=0.27$  for difference in pain score). There were no differences across the 3 groups  
54  
55  
56  
57  
58  
59  
60

1  
2  
3 with respect to either daily total pain score or difference ( $\chi^2 = 1415.1$ ,  $df = 1438$ ,  $p$ -value =  
4  
5 0.661) (See Supplementary Tables 2 and 3 for full results).  
6  
7  
8  
9

## 10 DISCUSSION

11  
12 *Summary of findings.* We leveraged 90,382 days of mHealth self-tracking data from  
13  
14 1,009 women with endometriosis to investigate the association between exercise behavior and  
15  
16 day-level fluctuations in pain. For the average individual, the association between previous-day  
17  
18 exercise to pain was moderated by their habitual exercise frequency, i.e., the frequency with  
19  
20 which they engaged in exercised in a typical week. This effect was consistent across participants  
21  
22 and independent of person-level covariates. There further was substantial between-person  
23  
24 heterogeneity in day-level pain patterns. To our knowledge, this is the first study to quantify the  
25  
26 association between day-level pain symptoms and exercise in an international sample of women  
27  
28 with endometriosis and to identify habitual weekly exercise frequency as a moderator of this  
29  
30 relationship.  
31  
32  
33  
34

35  
36 *Moderation effects.* Previous-day exercise was associated with more favorable pain  
37  
38 outcomes for participants who engaged in regular exercise at least 3 times per week in our  
39  
40 sample. In contrast, those who engaged in regular exercise less than twice a week were more  
41  
42 likely to experience pain symptoms on days after having engaged in exercise. This is in line with  
43  
44 the national physical activity guidelines [93], which recommend aerobic exercise at least 3 times  
45  
46 per week and muscle-strengthening exercise at least twice per week.[94] However, there are no  
47  
48 specific recommendations for endometriosis in the current guidelines; and systematic reviews  
49  
50 recommend “overall, general exercise” without further details due to lack adequate research on  
51  
52 the optimal dose of exercise for endometriosis pain.[4, 36] Our findings provide preliminary  
53  
54  
55  
56  
57  
58  
59  
60

1  
2  
3 evidence for informing exercise recommendations for endometriosis pain management (i.e.,  
4 prevention or reduction), specifically for targeting those who are at greater risk for insufficient  
5 regular exercise due to acute exacerbations in their pain after exercise. This moderation effect  
6 suggests that an individual might need to develop a regular, sustained exercise behavior (i.e.,  
7 habit) to start experiencing the favorable pain outcomes associated with acute bouts of exercise.  
8 Nevertheless, future experimental studies are warranted for a comprehensive investigation of this  
9 question.

10  
11  
12  
13  
14  
15  
16  
17  
18  
19 *Patterns of pain symptoms.* Our findings of moderate pain in pelvis as the most  
20 frequently reported pain are in line with those from others on endometriosis[95] and various  
21 chronic pain conditions.[96, 97] The distribution of the total daily pain scores was right-skewed  
22 (i.e., extreme scores on the higher ends of the range) with a mean score that was on the lower end  
23 of the range. This could partly be due to the data collection method which includes not just days  
24 where the participant experienced pain but also days without pain. Indeed, our participants on  
25 average did not report or experience any pain 6.25% of the time. In contrast, traditional study  
26 designs typically rely on recall of past pain experience aggregated over a period of time (e.g.,  
27 past week, month) and ask the participant to report their average or highest pain severity over  
28 this period.[98, 99] Such recall-based techniques are prone to peak-and-end effects,[100] and  
29 catastrophizing or other similar biases.[99, 101] Recruitment from clinical referral points is a  
30 common practice and this has been attributed to higher normative scores in the literature,[98] as  
31 opposed to more even distributions of pain symptomology among community-based  
32 samples.[102] Self-tracking facilitates documentation of not only severe pain, but also mild,  
33 moderate, and no pain instances, therefore enabling a more realistic representation of the pain  
34 experience as it dynamically unfolds over time. This can reduce the likelihood of over-

1  
2  
3 representing severe cases, which is a potential limitation attributed to data collected at point of  
4 contact in clinical settings.[17] However, it is difficult to make direct comparisons with other  
5  
6 studies given the different pain measures, warranting further research.  
7  
8

9  
10 *Patterns of exercise behavior.* The mean weekly exercise frequency in the study sample  
11 was 1.43/week (SD=1.57, IQR=2.29), with only 24.5 % (N=202) engaging in exercise at least  
12 three times a week. This suggests that individuals with endometriosis might be at increased risk  
13 for physical inactivity[93, 94], which is a risk factor for various comorbidities [103] and further  
14 linked to exacerbation of chronic pain.[104, 105] These collectively underscore the need to focus  
15 efforts on promoting regular exercise in women with endometriosis. Notably, yoga and  
16 stretching were reported collectively by almost half of the sample within Phendo. This could  
17 indicate that participants use these approaches for pain relief, in line with a previous study  
18 reporting efficacy of hatha yoga.[33] Nevertheless, participants overall tracked a wide range of  
19 exercise modalities across the intensity spectrum (e.g., yoga vs running/cycling) as helpful for  
20 their symptoms, suggesting between-individual variability in responses to a given exercise type  
21 or intensity. This can be targeted through individualized exercise prescriptions,[25, 106]  
22 providing precedence for undertaking a precision approach for pain self-management in  
23 endometriosis. Various individualization approaches (e.g., adaptive treatment strategies,[107]  
24 micro-randomized trials,[108] just-in-time adaptive interventions [109]) have been investigated  
25 for intervening on health behaviors, including PA.[5, 108] It would be opportune to implement a  
26 similar N-of-1 intervention approach for identifying person-specific optimal “dose” of exercise  
27 based on its parameters to target endometriosis pain symptoms.  
28  
29  
30  
31  
32  
33  
34  
35  
36  
37  
38  
39  
40  
41  
42  
43  
44  
45  
46  
47  
48  
49  
50

51 *Consideration of person-level factors.* Another novel finding in our study was the similar  
52 point estimates for the effect of exercise on pain outcomes between those with clinician/surgical-  
53  
54  
55  
56  
57  
58  
59  
60

1  
2  
3 versus suspected diagnosis of endometriosis. Endometriosis is difficult to diagnose, with a 7.6-  
4 year delay between symptom onset and its surgical diagnosis.[20, 110, 111] Endometriosis  
5 patients further face insurance-related challenges in accessing healthcare for their condition.[15,  
6 112] The participants without a formal diagnosis might have sought medical care for their  
7 symptoms but not received the needed care (e.g., diagnostic testing, referral to a specialist),  
8 received false negative diagnostic tests results,[110] or lacked adequate access to healthcare.  
9 This finding underscores the need for further research in endometriosis that considers self-report  
10 of endometriosis symptoms, instead of limiting to patients with a physician referral or relying on  
11 secondary data sources (e.g., electronic health records).  
12  
13  
14  
15  
16  
17  
18  
19  
20  
21  
22  
23

24 *Novel methodological contributions.* In contrast to other existing questionnaires in the  
25 literature, the self-tracking items in Phendo measure momentary and daily pain symptoms and  
26 exercise –a time interval for which there are no standard validated, commonly used measures  
27 designed for frequent sampling. Computation of a composite pain has been proposed by  
28 others[63] as this circumvents numerous limitations in current pain assessment approaches,  
29 including lack of a standard single outcome that can be used universally,[61] or a validated  
30 instrument that captures all the constructs of persistent pain.[113] There is furthermore a lack of  
31 endometriosis-specific pain measures for repeated assessments, thus the heuristic composite pain  
32 measure allowed consideration of two dimensions of pain simultaneously in our analyses. The  
33 scores in the current study sample were moderately correlated with those from the pelvic-  
34 abdominal VAS and the SF-36 bodily pain measure, which were also similarly correlated with  
35 each other ( $r=0.46$ ,  $p<0.0001$ ). Nevertheless, future directions include evaluation of this measure  
36 in larger samples for its reliability and validity via a nomological network-based analysis.  
37  
38  
39  
40  
41  
42  
43  
44  
45  
46  
47  
48  
49  
50  
51  
52

53 *Limitations.* We acknowledge several limitations of this study, including reliance on self-  
54  
55  
56  
57  
58  
59  
60

1  
2  
3 reports for the type of endometriosis diagnosis and exercise behavior. First, we used a binary  
4  
5 measure of exercise in our analyses and did not have sufficient details on duration or intensity for  
6  
7 inclusion in the analyses as potential moderators. Similarly, we did not have granular daily data  
8  
9 on pain medication use, as such it was not investigated as a potential covariate in the analyses. In  
10  
11 addition to medications, future studies could consider other pain management approaches for  
12  
13 comparison to exercise, given previous research suggesting endometriosis patients report using a  
14  
15 variety of symptom management techniques.[45] Next, our sample consisted primarily of White,  
16  
17 non-Hispanic women who are relatively consistent mHealth technology users and furthermore  
18  
19 can understand English to use the App. Therefore the results might differ among other groups  
20  
21 including non-English speakers or those without an interest in mHealth use for self-management  
22  
23 or monitoring.  
24  
25  
26  
27  
28  
29  
30

### 31 **Conclusion**

32  
33 In this study, we provide evidence that habitual exercise frequency is a potential  
34  
35 moderator of the association between pain symptoms and previous-day exercise in  
36  
37 endometriosis, indicating that those who regularly exercise at least ~3 times per week are less  
38  
39 likely to report pain symptoms after having exercised on the previous day. Individuals with  
40  
41 endometriosis are significantly more likely to have higher all-cause healthcare utilization and  
42  
43 direct health care costs than those without endometriosis, including twice the prevalence of  
44  
45 opioid prescriptions for pain management [23] and prolonged duration of prescriptions.[22]  
46  
47 While guidelines recommend prescribing exercise for management of pain in clinical  
48  
49 populations, endometriosis (or general chronic) pain-specific recommendations to guide patients  
50  
51 and providers on measurable parameters (time, type, intensity, and frequency) are lacking. This  
52  
53  
54  
55  
56  
57  
58  
59  
60

warrants future studies investigating the effects of both acute and chronic exercise on endometriosis pain with a focus on various types, intensities and durations.

### **Author Contributions**

IE conceptualized the study, conducted the data analyses, and prepared the first draft of the manuscript. SLG and ENH were responsible for data acquisition, curation and management. NE acquired the funding and provided the mHealth infrastructure for the study (Phendo App). NE and SB provided guidance on the study design and data analyses. SB, NE, SLG and ENH critically reviewed and provided feedback on the manuscript.

### **Funding**

Funding for the work is provided by a postdoctoral fellowship from the Data Science Institute at Columbia University and an award from the National Library of Medicine (R01 LM013043). We are grateful to the Phendo participants.

### **Competing Interests**

All authors report no conflicts of interest.

### **Data availability statement**

Data are available on reasonable request.

1. Available at <https://itunes.apple.com/us/app/phendo/id1145512423>
2. Available at <https://play.google.com/store/apps/details?id=com.appliedinformaticsinc.phendo>

## References

1. Ambrose KR, Golightly YM. Physical exercise as non-pharmacological treatment of chronic pain: Why and when. *Best Pract Res Clin Rheumatol*. 2015;29(1):120-30. Epub 2015/05/23. doi: 10.1016/j.berh.2015.04.022. PubMed PMID: 26267006.
2. Rice D, Nijs J, Kosek E, Wideman T, Hasenbring MI, Koltyn K, et al. Exercise-Induced Hypoalgesia in Pain-Free and Chronic Pain Populations: State of the Art and Future Directions. *The Journal of Pain*. 2019;20(11):1249-66. doi: <https://doi.org/10.1016/j.jpain.2019.03.005>.
3. Lemmens J, De Pauw J, Van Soom T, Michiels S, Versijpt J, van Breda E, et al. The effect of aerobic exercise on the number of migraine days, duration and pain intensity in migraine: a systematic literature review and meta-analysis. *J Headache Pain*. 2019;20(1):16. Epub 2019/02/16. doi: 10.1186/s10194-019-0961-8. PubMed PMID: 30764753; PubMed Central PMCID: PMC6734345.
4. Armour M, Ee CC, Naidoo D, Ayati Z, Chalmers KJ, Steel KA, et al. Exercise for dysmenorrhoea. *Cochrane Database of Systematic Reviews*. 2019;(9). doi: 10.1002/14651858.CD004142.pub4. PubMed PMID: CD004142.
5. Rabbi M, Aung MS, Gay G, Reid MC, Choudhury T. Feasibility and acceptability of mobile phone-based auto-personalized physical activity recommendations for chronic pain self-management: pilot study on adults. *Journal of medical Internet research*. 2018;20(10):e10147.
6. Sevel L, Boissoneault J, Alappattu M, Bishop M, Robinson M. Training endogenous pain modulation: a preliminary investigation of neural adaptation following repeated exposure to clinically-relevant pain. *Brain Imaging and Behavior*. 2020;14(3):881-96. doi: 10.1007/s11682-018-0033-8.
7. Gordon R, Bloxham S, editors. A systematic review of the effects of exercise and physical activity on non-specific chronic low back pain. *Healthcare*; 2016: Multidisciplinary Digital Publishing Institute.
8. Geneen LJ, Moore RA, Clarke C, Martin D, Colvin LA, Smith BH. Physical activity and exercise for chronic pain in adults: an overview of Cochrane Reviews. *Cochrane Database of Systematic Reviews*. 2017;(4).
9. Zhang R, Chomistek AK, Dimitrakoff JD, Giovannucci EL, Willett WC, Rosner BA, et al. Physical activity and chronic prostatitis/chronic pelvic pain syndrome. *Med Sci Sports Exerc*. 2015;47(4):757-64. doi: 10.1249/MSS.0000000000000472. PubMed PMID: 25116086.
10. Pinto A, Di Raimondo D, Tuttolomondo A, Buttà C, Milio G, Licata G. Effects of physical exercise on inflammatory markers of atherosclerosis. *Current pharmaceutical design*. 2012;18(28):4326-49.



11. Garatachea N, Molinero O, Martínez-García R, Jimenez-Jimenez R, Gonzalez-Gallego J, Marquez S. Feelings of well being in elderly people: relationship to physical activity and physical function. *Archives of Gerontology and Geriatrics*. 2009;48(3):306-12.
12. Tennfjord MK, Gabrielsen R, Tellum T. Effect of physical activity and exercise on endometriosis-associated symptoms: a systematic review. *BMC Women's Health*. 2021;21(1):355. doi: 10.1186/s12905-021-01500-4.
13. Evans S, Fernandez S, Olive L, Payne LA, Mikocka-Walus A. Psychological and mind-body interventions for endometriosis: A systematic review. *J Psychosom Res*. 2019;124:109756. Epub 2019/08/25. doi: 10.1016/j.jpsychores.2019.109756. PubMed PMID: 31443810.
14. Mira TAA, Buen MM, Borges MG, Yela DA, Benetti-Pinto CL. Systematic review and meta-analysis of complementary treatments for women with symptomatic endometriosis. *Int J Gynaecol Obstet*. 2018;143(1):2-9. Epub 2018/06/27. doi: 10.1002/ijgo.12576. PubMed PMID: 29944729.
15. Fourquet J, Gao X, Zavala D, Orengo JC, Abac S, Ruiz A, et al. Patients' report on how endometriosis affects health, work, and daily life. *Fertil Steril*. 2010;93(7):2424-8. doi: 10.1016/j.fertnstert.2009.09.017. PubMed PMID: 19926084.
16. Schliep KC, Mumford SL, Peterson CM, Chen Z, Johnstone EB, Sharp HT, et al. Pain typology and incident endometriosis. *Hum Reprod*. 2015;30(10):2427-38. Epub 2015/08/11. doi: 10.1093/humrep/dev147. PubMed PMID: 26269529.
17. De Graaff A, D'hooghe T, Dunselman G, Dirksen C, Hummelshoj L, Consortium WE, et al. The significant effect of endometriosis on physical, mental and social wellbeing: results from an international cross-sectional survey. *Human reproduction*. 2013;28(10):2677-85.
18. Simoens S, Dunselman G, Dirksen C, Hummelshoj L, Bokor A, Brandes I, et al. The burden of endometriosis: costs and quality of life of women with endometriosis and treated in referral centres. *Human Reproduction*. 2012;27(5):1292-9.
19. Soliman AM, Coyne KS, Gries KS, Castelli-Haley J, Snabes MC, Surrey ES. The effect of endometriosis symptoms on absenteeism and presenteeism in the workplace and at home. *Journal of managed care & specialty pharmacy*. 2017;23(7):745-54.
20. Simoens S, Dunselman G, Dirksen C, Hummelshoj L, Bokor A, Brandes I, et al. The burden of endometriosis: costs and quality of life of women with endometriosis and treated in referral centres. *Hum Reprod*. 2012;27(5):1292-9. Epub 2012/03/17. doi: 10.1093/humrep/des073. PubMed PMID: 22422778.
21. The Practice Committee of the American Society for Reproductive Medicine. Treatment of pelvic pain associated with endometriosis: a committee opinion. 2014 2014/04/01/. Report No.: 0015-0282 Contract No.: 4.

- 1  
2  
3 22. Lamvu G, Soliman AM, Manthena SR, Gordon K, Knight J, Taylor HS. Patterns of  
4 prescription opioid use in women with endometriosis: evaluating prolonged use, daily dose, and  
5 concomitant use with benzodiazepines. *Obstetrics and gynecology*. 2019;133(6):1120.  
6  
7  
8 23. Soliman AM, Surrey ES, Bonafede M, Nelson JK, Vora JB, Agarwal SK. Health care  
9 utilization and costs associated with endometriosis among women with medicaid insurance.  
10 *Journal of managed care & specialty pharmacy*. 2019;25(5):566-72.  
11  
12 24. Dowell D, Haegerich TM, Chou R. CDC guideline for prescribing opioids for chronic  
13 pain—United States, 2016. *Jama*. 2016;315(15):1624-45.  
14  
15 25. Sluka KA, Frey-Law L, Hoeger Bement M. Exercise-induced pain and analgesia?  
16 Underlying mechanisms and clinical translation. *Pain*. 2018;159 Suppl 1(Suppl 1):S91-S7. doi:  
17 10.1097/j.pain.0000000000001235. PubMed PMID: 30113953.  
18  
19  
20 26. Tour J, Löfgren M, Mannerkorpi K, Gerdle B, Larsson A, Palstam A, et al. Gene-to-gene  
21 interactions regulate endogenous pain modulation in fibromyalgia patients and healthy controls-  
22 antagonistic effects between opioid and serotonin-related genes. *Pain*. 2017;158(7):1194-203.  
23 Epub 2017/03/11. doi: 10.1097/j.pain.0000000000000896. PubMed PMID: 28282362; PubMed  
24 Central PMCID: PMC5472004.  
25  
26  
27 27. Bobinski F, Teixeira JM, Sluka KA, Santos ARS. Interleukin-4 mediates the analgesia  
28 produced by low-intensity exercise in mice with neuropathic pain. *Pain*. 2018;159(3):437-50.  
29 Epub 2017/11/16. doi: 10.1097/j.pain.0000000000001109. PubMed PMID: 29140923; PubMed  
30 Central PMCID: PMC5812806.  
31  
32 28. Montenegro ML, Bonoche CM, Meola J, Portella RL, Ribeiro-Silva A, Brunaldi MO, et  
33 al. Effect of Physical Exercise on Endometriosis Experimentally Induced in Rats. *Reproductive*  
34 *sciences (Thousand Oaks, Calif)*. 2018:1933719118799205. Epub 2018/09/21. doi:  
35 10.1177/1933719118799205. PubMed PMID: 30231769.  
36  
37  
38 29. Stratton P, Berkley KJ. Chronic pelvic pain and endometriosis: translational evidence of  
39 the relationship and implications. *Human reproduction update*. 2011;17(3):327-46. Epub  
40 2010/11/23. doi: 10.1093/humupd/dmq050. PubMed PMID: 21106492.  
41  
42 30. Park S-J, Yong M-S, Na S-S. Effect of exercise on the expression of nerve growth factor  
43 in the spinal cord of rats with induced osteoarthritis. *Journal of physical therapy science*.  
44 2015;27(8):2551-4. Epub 2015/08/21. doi: 10.1589/jpts.27.2551. PubMed PMID: 26357438.  
45  
46  
47 31. Karasawa Y, Yamada K, Iseki M, Yamaguchi M, Murakami Y, Tamagawa T, et al.  
48 Association between change in self-efficacy and reduction in disability among patients with  
49 chronic pain. *PLOS ONE*. 2019;14(4):e0215404. doi: 10.1371/journal.pone.0215404.  
50  
51 32. Armour M, Sinclair J, Chalmers KJ, Smith CA. Self-management strategies amongst  
52 Australian women with endometriosis: a national online survey. *BMC Complementary and*  
53 *Alternative Medicine*. 2019;19(1):17. doi: 10.1186/s12906-019-2431-x.  
54  
55  
56  
57  
58  
59  
60

- 1  
2  
3 33. Gonçalves AV, Barros NF, Bahamondes L. The Practice of Hatha Yoga for the  
4 Treatment of Pain Associated with Endometriosis. *Journal of Alternative & Complementary*  
5 *Medicine*. 2017;23(1):45-52. doi: 10.1089/acm.2015.0343. PubMed PMID: 120746246.  
6  
7  
8 34. Ricci E, Viganò P, Cipriani S, Chiaffarino F, Bianchi S, Rebonato G, et al. Physical  
9 activity and endometriosis risk in women with infertility or pain: Systematic review and meta-  
10 analysis. *Medicine*. 2016;95(40):e4957-e. doi: 10.1097/MD.0000000000004957. PubMed  
11 PMID: 27749551.  
12  
13 35. Carpenter SE, Tjaden B, Rock JA, Kimball A. The effect of regular exercise on women  
14 receiving danazol for treatment of endometriosis. *International journal of gynaecology and*  
15 *obstetrics: the official organ of the International Federation of Gynaecology and Obstetrics*.  
16 1995;49(3):299-304. Epub 1995/06/01. PubMed PMID: 9764869.  
17  
18 36. Bonoche CM, Montenegro ML, Rosa ESJC, Ferriani RA, Meola J. Endometriosis and  
19 physical exercises: a systematic review. *Reproductive biology and endocrinology : RB&E*.  
20 2014;12:4. Epub 2014/01/08. doi: 10.1186/1477-7827-12-4. PubMed PMID: 24393293; PubMed  
21 Central PMCID: PMC3895811.  
22  
23 37. Naugle KM, Fillingim RB, Riley JL, 3rd. A meta-analytic review of the hypoalgesic  
24 effects of exercise. *The journal of pain : official journal of the American Pain Society*.  
25 2012;13(12):1139-50. Epub 2012/11/08. doi: 10.1016/j.jpain.2012.09.006. PubMed PMID:  
26 23141188.  
27  
28 38. Janal MN, Colt EWD, Clark WC, Glusman M. Pain sensitivity, mood and plasma  
29 endocrine levels in man following long-distance running: Effects of naloxone. *Pain*.  
30 1984;19(1):13-25. doi: [https://doi.org/10.1016/0304-3959\(84\)90061-7](https://doi.org/10.1016/0304-3959(84)90061-7).  
31  
32 39. Droste C, Greenlee MW, Schreck M, Roskamm H. Experimental pain thresholds and  
33 plasma beta-endorphin levels during exercise. *Medicine & Science in Sports & Exercise*.  
34 1991;23(3):334-42. doi: 10.1249/00005768-199103000-00012.  
35  
36 40. Scheef L, Jankowski J, Daamen M, Weyer G, Klingenberg M, Renner J, et al. An fMRI  
37 study on the acute effects of exercise on pain processing in trained athletes. *PAIN*. 2012;153(8).  
38  
39 41. Hoffman MD, Hoffman DR. Exercisers Achieve Greater Acute Exercise-Induced Mood  
40 Enhancement Than Nonexercisers. *Archives of Physical Medicine and Rehabilitation*.  
41 2008;89(2):358-63. doi: 10.1016/j.apmr.2007.09.026.  
42  
43 42. Hallgren M, Moss ND, Gastin P. Regular exercise participation mediates the affective  
44 response to acute bouts of vigorous exercise. *J Sports Sci Med*. 2010;9(4):629-37. Epub  
45 2010/01/01. PubMed PMID: 24149790; PubMed Central PMCID: PMC3761821.  
46  
47 43. Chen Y-C, Chen C, Martínez RM, Etnier JL, Cheng Y. Habitual physical activity  
48 mediates the acute exercise-induced modulation of anxiety-related amygdala functional  
49 connectivity. *Scientific Reports*. 2019;9(1):19787. doi: 10.1038/s41598-019-56226-z.  
50  
51  
52  
53  
54  
55  
56  
57  
58  
59  
60

- 1  
2  
3  
4  
5  
6  
7  
8  
9  
10  
11  
12  
13  
14  
15  
16  
17  
18  
19  
20  
21  
22  
23  
24  
25  
26  
27  
28  
29  
30  
31  
32  
33  
34  
35  
36  
37  
38  
39  
40  
41  
42  
43  
44  
45  
46  
47  
48  
49  
50  
51  
52  
53  
54  
55  
56  
57  
58  
59  
60
44. May M, Junghaenel DU, Ono M, Stone AA, Schneider S. Ecological Momentary Assessment Methodology in Chronic Pain Research: A Systematic Review. *J Pain*. 2018;19(7):699-716. Epub 2018/01/31. doi: 10.1016/j.jpain.2018.01.006. PubMed PMID: 29371113.
45. Ensari I, Pichon A, Lipsky-Gorman S, Bakken S, Elhadad N. Augmenting the Clinical Data Sources for Enigmatic Diseases: A Cross-Sectional Study of Self-Tracking Data and Clinical Documentation in Endometriosis. *Applied Clinical Informatics*. 2020;11(05):769-84.
46. Urteaga I, McKillop M, Elhadad N. Learning endometriosis phenotypes from patient-generated data. *npj Digital Medicine*. 2020;3(1):88. doi: 10.1038/s41746-020-0292-9.
47. Pratap A, Neto EC, Snyder P, Stepnowsky C, Elhadad N, Grant D, et al. Indicators of retention in remote digital health studies: a cross-study evaluation of 100,000 participants. *npj Digital Medicine*. 2020;3(1):21. doi: 10.1038/s41746-020-0224-8.
48. McKillop M, Voigt N, Schnall R, Elhadad N. Exploring self-tracking as a participatory research activity among women with endometriosis. *Journal of Participatory Medicine*. 2016.
49. McKillop M, Mamykina L, Elhadad N, editors. *Designing in the Dark: Eliciting Self-tracking Dimensions for Understanding Enigmatic Disease*. Proceedings of the 2018 CHI Conference on Human Factors in Computing Systems; 2018: ACM.
50. Frost MH, Reeve BB, Liepa AM, Stauffer JW, Hays RD. What is sufficient evidence for the reliability and validity of patient-reported outcome measures? *Value Health*. 2007;10 Suppl 2:S94-s105. Epub 2007/11/13. doi: 10.1111/j.1524-4733.2007.00272.x. PubMed PMID: 17995479.
51. Anthoine E, Moret L, Regnault A, Sébille V, Hardouin J-B. Sample size used to validate a scale: a review of publications on newly-developed patient reported outcomes measures. *Health Qual Life Outcomes*. 2014;12:176-. doi: 10.1186/s12955-014-0176-2. PubMed PMID: 25492701.
52. US Department of Health Human Services. *Guidance for industry-Patient-reported outcome measures: Use in medical product development to support labeling claims*. 2009.
53. Lomas J, Pickard L, Mohide A. Patient versus clinician item generation for quality-of-life measures: the case of language-disabled adults. *Medical Care*. 1987:764-9.
54. Melzack R. The McGill Pain Questionnaire: Major properties and scoring methods. *PAIN*. 1975;1(3).
55. Jones KR, Vojir CP, Hutt E, Fink R. Determining mild, moderate, and severe pain equivalency across pain-intensity tools in nursing home residents. *J Rehabil Res Dev*. 2007;44(2):305-14. Epub 2007/06/07. doi: 10.1682/jrrd.2006.05.0051. PubMed PMID: 17551881.

- 1  
2  
3 56. Bestel E, Gotteland J-P, Donnez J, Taylor RN, Garner EI. Linzagolix for Endometriosis-  
4 Associated Pain: Lipid Changes After 52 Weeks of Treatment [25B]. *Obstetrics & Gynecology*.  
5 2020;135:25S. doi: 10.1097/01.AOG.0000663180.46470.c9. PubMed PMID: 00006250-  
6 202005001-00082.  
7
- 8  
9 57. Serlin RC, Mendoza TR, Nakamura Y, Edwards KR, Cleeland CS. When is cancer pain  
10 mild, moderate or severe? Grading pain severity by its interference with function. *Pain*.  
11 1995;61(2):277-84. Epub 1995/05/01. doi: 10.1016/0304-3959(94)00178-h. PubMed PMID:  
12 7659438.  
13
- 14 58. Adams P, Murnane EL, Elfenbein M, Wethington E, Gay G. Supporting the Self-  
15 Management of Chronic Pain Conditions with Tailored Momentary Self-Assessments. *Proc*  
16 *SIGCHI Conf Hum Factor Comput Syst*. 2017;2017:1065-77. doi: 10.1145/3025453.3025832.  
17 PubMed PMID: 30310887.  
18
- 19  
20 59. Lee RR, Rashid A, Ghio D, Thomson W, Cordingley L. "Seeing Pain Differently": A  
21 Qualitative Investigation Into the Differences and Similarities of Pain and Rheumatology  
22 Specialists' Interpretation of Multidimensional Mobile Health Pain Data From Children and  
23 Young People With Juvenile Idiopathic Arthritis. *JMIR Mhealth Uhealth*. 2019;7(7):e12952.  
24 Epub 2019/07/04. doi: 10.2196/12952. PubMed PMID: 31267979; PubMed Central PMCID:  
25 PMC6632104.  
26
- 27  
28 60. Jamison RN, Raymond SA, Levine JG, Slawsby EA, Nedeljkovic SS, Katz NP.  
29 Electronic diaries for monitoring chronic pain: 1-year validation study. *Pain*. 2001;91(3):277-85.  
30
- 31 61. Bouhassira D, Attal N. All in one: Is it possible to assess all dimensions of any pain with  
32 a simple questionnaire? *PAIN*. 2009;144(1).  
33
- 34 62. Boonstra AM, Stewart RE, Köke AJA, Oosterwijk RFA, Swaan JL, Schreurs KMG, et al.  
35 Cut-Off Points for Mild, Moderate, and Severe Pain on the Numeric Rating Scale for Pain in  
36 Patients with Chronic Musculoskeletal Pain: Variability and Influence of Sex and  
37 Catastrophizing. *Front Psychol*. 2016;7:1466-. doi: 10.3389/fpsyg.2016.01466. PubMed PMID:  
38 27746750.  
39
- 40  
41 63. Pilitsis JG, Fahey M, Custozzo A, Chakravarthy K, Capobianco R. Composite score is a  
42 better reflection of patient response to chronic pain therapy compared with pain intensity alone.  
43 *Neuromodulation: Technology at the Neural Interface*. 2021;24(1):68-75.  
44
- 45 64. Dirks JF, Wunder J, Kinsman R, McElhinny J, Jones NF. A Pain Rating Scale and a Pain  
46 Behavior Checklist for Clinical Use: Development, Norms, and the Consistency Score.  
47 *Psychotherapy and Psychosomatics*. 1993;59(1):41-9.  
48
- 49  
50 65. Faurholt-Jepsen M, Munkholm K, Frost M, Bardram JE, Kessing LV. Electronic self-  
51 monitoring of mood using IT platforms in adult patients with bipolar disorder: A systematic  
52 review of the validity and evidence. *BMC Psychiatry*. 2016;16(1):7. doi: 10.1186/s12888-016-  
53 0713-0.  
54  
55  
56  
57  
58  
59

- 1  
2  
3 66. Charter RA. Sample size requirements for precise estimates of reliability,  
4 generalizability, and validity coefficients. *J Clin Exp Neuropsychol*. 1999;21(4):559-66. Epub  
5 1999/11/07. doi: 10.1076/jcen.21.4.559.889. PubMed PMID: 10550813.  
6  
7  
8 67. Knell G, Gabriel KP, Businelle MS, Shuval K, Wetter DW, Kendzor DE. Ecological  
9 Momentary Assessment of Physical Activity: Validation Study. *J Med Internet Res*.  
10 2017;19(7):e253. doi: 10.2196/jmir.7602.  
11  
12 68. Swendeman D, Comulada WS, Koussa M, Worthman CM, Estrin D, Rotheram-Borus  
13 MJ, et al. Longitudinal Validity and Reliability of Brief Smartphone Self-Monitoring of Diet,  
14 Stress, and Physical Activity in a Diverse Sample of Mothers. *JMIR Mhealth Uhealth*.  
15 2018;6(9):e176. Epub 2018/09/27. doi: 10.2196/mhealth.9378. PubMed PMID: 30249576;  
16 PubMed Central PMCID: PMC6231816.  
17  
18 69. Katapally TR, Chu LM. Digital epidemiological and citizen science methodology to  
19 capture prospective physical activity in free-living conditions: a SMART Platform study. *BMJ*  
20 *Open*. 2020;10(6):e036787. Epub 2020/07/01. doi: 10.1136/bmjopen-2020-036787. PubMed  
21 PMID: 32595163; PubMed Central PMCID: PMC7322321.  
22  
23 70. Zink J, Belcher BR, Dzubur E, Ke W, O'Connor S, Huh J, et al. Association Between  
24 Self-Reported and Objective Activity Levels by Demographic Factors: Ecological Momentary  
25 Assessment Study in Children. *JMIR Mhealth Uhealth*. 2018;6(6):e150. doi:  
26 10.2196/mhealth.9592.  
27  
28 71. Ensari I, Horan E, Bakken S, Elhadad N. Evaluation of a disease-specific mHealth  
29 exercise measure for daily self-tracking MedRXiv. 2022;Under review.  
30  
31 72. Kuntz JL, Young DR, Saelens BE, Frank LD, Meenan RT, Dickerson JF, et al. Validity  
32 of the Exercise Vital Sign Tool to Assess Physical Activity. *Am J Prev Med*. 2021;60(6):866-72.  
33 Epub 2021/03/31. doi: 10.1016/j.amepre.2021.01.012. PubMed PMID: 33781618; PubMed  
34 Central PMCID: PMC8154650.  
35  
36 73. Wolf AM, Hunter DJ, Colditz GA, Manson JE, Stampfer MJ, Corsano KA, et al.  
37 Reproducibility and validity of a self-administered physical activity questionnaire. *Int J*  
38 *Epidemiol*. 1994;23(5):991-9. Epub 1994/10/01. doi: 10.1093/ije/23.5.991. PubMed PMID:  
39 7860180.  
40  
41 74. Vitonis AF, Vincent K, Rahmioglu N, Fassbender A, Buck Louis GM, Hummelshoj L, et  
42 al. World Endometriosis Research Foundation Endometriosis Phenome and Biobanking  
43 Harmonization Project: II. Clinical and covariate phenotype data collection in endometriosis  
44 research. *Fertility and sterility*. 2014;102(5):1223-32. Epub 2014/09/22. doi:  
45 10.1016/j.fertnstert.2014.07.1244. PubMed PMID: 25256930.  
46  
47 75. Jones G, Kennedy S, Barnard A, Wong J, Jenkinson C. Development of an endometriosis  
48 quality-of-life instrument: The Endometriosis Health Profile-30. *Obstet Gynecol*.  
49 2001;98(2):258-64. Epub 2001/08/17. doi: 10.1016/s0029-7844(01)01433-8. PubMed PMID:  
50 11506842.  
51  
52  
53  
54  
55  
56  
57  
58  
59  
60

- 1  
2  
3 76. McHorney CA, Ware JE, Lu JFR, Sherbourne CD. The MOS 36-Item Short-Form Health  
4 Survey (SF-36): III. Tests of Data Quality, Scaling Assumptions, and Reliability across Diverse  
5 Patient Groups. *Medical Care*. 1994;32(1):40-66.  
6  
7 77. Ainsworth BE, Haskell WL, Herrmann SD, Meckes N, Bassett DR, Tudor-Locke C, et al.  
8 2011 Compendium of Physical Activities: a second update of codes and MET values. *Med Sci*  
9 *Sports Exerc*. 2011;43(8):1575-81.  
10  
11 78. Hu M-C, Pavlicova M, Nunes EV. Zero-inflated and hurdle models of count data with  
12 extra zeros: examples from an HIV-risk reduction intervention trial. *Am J Drug Alcohol Abuse*.  
13 2011;37(5):367-75. doi: 10.3109/00952990.2011.597280. PubMed PMID: 21854279.  
14  
15 79. Brooks ME, Kristensen K, van Benthem KJ, Magnusson A, Berg CW, Nielsen A, et al.  
16 glmmTMB balances speed and flexibility among packages for zero-inflated generalized linear  
17 mixed modeling. *The R journal*. 2017;9(2):378-400.  
18  
19 80. Brooks ME, Kristensen K, van Benthem KJ, Magnusson A, Berg CW, Nielsen A, et al.  
20 Modeling zero-inflated count data with glmmTMB. *bioRxiv*. 2017:132753. doi: 10.1101/132753.  
21  
22 81. van Buuren S, Groothuis-Oudshoorn K. mice: Multivariate Imputation by Chained  
23 Equations in R. *Journal of Statistical Software*; Vol 1, Issue 3 (2011). 2011.  
24  
25 82. Van Buuren S. *Flexible imputation of missing data*: CRC press; 2018.  
26  
27 83. Bondarenko I, Raghunathan T. Graphical and numerical diagnostic tools to assess  
28 suitability of multiple imputations and imputation models. *Statistics in Medicine*.  
29 2016;35(17):3007-20. doi: <https://doi.org/10.1002/sim.6926>.  
30  
31 84. Rubin DB. The Calculation of Posterior Distributions by Data Augmentation: Comment:  
32 A Noniterative Sampling/Importance Resampling Alternative to the Data Augmentation  
33 Algorithm for Creating a Few Imputations When Fractions of Missing Information Are Modest:  
34 The SIR Algorithm. *Journal of the American Statistical Association*. 1987;82(398):543-6. doi:  
35 10.2307/2289460.  
36  
37 85. Rubin DB. *Multiple imputation for nonresponse in surveys*: John Wiley & Sons; 2004.  
38  
39 86. Schunck R. Cluster Size and Aggregated Level 2 Variables in Multilevel Models. A  
40 Cautionary Note. 2016. 2016;10(1). Epub 2016-07-20. doi: 10.12758/mda.2016.005.  
41  
42 87. Bell B, Ferron J, Kromrey J, editors. *Cluster Size in Multilevel Models: The Impact of*  
43 *Sparse Data Structures on Point and Interval Estimates in Two-Level Models* 2008.  
44  
45 88. Austin PC, Leckie G. The effect of number of clusters and cluster size on statistical  
46 power and Type I error rates when testing random effects variance components in multilevel  
47 linear and logistic regression models. *Journal of Statistical Computation and Simulation*.  
48 2018;88(16):3151-63. doi: 10.1080/00949655.2018.1504945.  
49  
50  
51  
52  
53  
54  
55  
56  
57  
58  
59  
60

- 1  
2  
3 89. Snijders TAB. Power and sample size in multilevel modeling. In: Everitt B, Howell D,  
4 editors. Encyclopedia of Statistics in Behavioral Science. 3: Wiley; 2006. p. 1570–3.  
5  
6 90. Core Team R. R: A language and environment for statistical computing. R Foundation  
7 for Statistical Computing; Vienna, Austria 1997.  
8  
9 91. Scheipl F, Greven S, Küchenhoff H. Size and power of tests for a zero random effect  
10 variance or polynomial regression in additive and linear mixed models. Computational statistics  
11 & data analysis. 2008;52(7):3283-99.  
12  
13 92. Crainiceanu CM, Ruppert D. Likelihood ratio tests in linear mixed models with one  
14 variance component. Journal of the Royal Statistical Society: Series B (Statistical Methodology).  
15 2004;66(1):165-85.  
16  
17 93. US Department of Health Human Services Physical activity guidelines advisory  
18 committee scientific report. 2018.  
19  
20 94. Piercy KL, Troiano RP, Ballard RM, Carlson SA, Fulton JE, Galuska DA, et al. The  
21 physical activity guidelines for Americans. Jama. 2018;320(19):2020-8.  
22  
23 95. Warzecha D, Szymusik I, Wielgos M, Pietrzak B. The Impact of Endometriosis on the  
24 Quality of Life and the Incidence of Depression-A Cohort Study. Int J Environ Res Public  
25 Health. 2020;17(10). Epub 2020/05/28. doi: 10.3390/ijerph17103641. PubMed PMID:  
26 32455821; PubMed Central PMCID: PMC7277332.  
27  
28 96. Becker N, Thomsen AB, Olsen AK, Sjogren P, Bech P, Eriksen J. Pain epidemiology and  
29 health related quality of life in chronic non-malignant pain patients referred to a Danish  
30 multidisciplinary pain center. Pain. 1997;73(3):393-400. doi: 10.1016/s0304-3959(97)00126-7.  
31 PubMed PMID: WOS:000071429200014.  
32  
33 97. Bouhassira D, Lantéri-Minet M, Attal N, Laurent B, Touboul C. Prevalence of chronic  
34 pain with neuropathic characteristics in the general population. Pain. 2008;136(3):380-7.  
35  
36 98. Nicholas MK, Asghari A, Blyth FM. What do the numbers mean? Normative data in  
37 chronic pain measures. Pain. 2008;134(1):158-73. doi:  
38 <https://doi.org/10.1016/j.pain.2007.04.007>.  
39  
40 99. Dansie EJ, Turk DC. Assessment of patients with chronic pain. Br J Anaesth.  
41 2013;111(1):19-25. doi: 10.1093/bja/aet124. PubMed PMID: 23794641.  
42  
43 100. Schneider S, Stone AA, Schwartz JE, Broderick JE. Peak and end effects in patients'  
44 daily recall of pain and fatigue: a within-subjects analysis. J Pain. 2011;12(2):228-35. doi:  
45 10.1016/j.jpain.2010.07.001. PubMed PMID: 20817615.  
46  
47 101. De Boer M, Struys M, Versteegen G. Pain-related catastrophizing in pain patients and  
48 people with pain in the general population. European journal of pain. 2012;16(7):1044-52.  
49  
50  
51  
52  
53  
54  
55  
56  
57  
58  
59  
60



- 1  
2  
3 102. Ehde DM, Gibbons LE, Chwastiak L, Bombardier CH, Sullivan MD, Kraft GH. Chronic  
4 pain in a large community sample of persons with multiple sclerosis. *Multiple Sclerosis Journal*.  
5 2003;9(6):605-11. doi: 10.1191/1352458503ms939oa.  
6
- 7 103. Katzmarzyk PT, Powell KE, Jakicic JM, Troiano RP, Piercy K, Tennant B, et al.  
8 *Sedentary Behavior and Health: Update from the 2018 Physical Activity Guidelines Advisory*  
9 *Committee. Med Sci Sports Exerc.* 2019;51(6):1227-41. doi: 10.1249/MSS.0000000000001935.  
10 PubMed PMID: 31095080.  
11  
12
- 13 104. Basen-Engquist K, Scruggs S, Jhingran A, Bodurka DC, Lu K, Ramondetta L, et al.  
14 *Physical activity and obesity in endometrial cancer survivors: associations with pain, fatigue, and*  
15 *physical functioning. Am J Obstet Gynecol.* 2009;200(3):288.e1-.e2888. Epub 2008/12/25. doi:  
16 10.1016/j.ajog.2008.10.010. PubMed PMID: 19110220.  
17  
18
- 19 105. Dansie EJ, Turk DC, Martin KR, Van Domelen DR, Patel KV. Association of Chronic  
20 Widespread Pain With Objectively Measured Physical Activity in Adults: Findings From the  
21 National Health and Nutrition Examination Survey. *The Journal of Pain.* 2014;15(5):507-15. doi:  
22 <https://doi.org/10.1016/j.jpain.2014.01.489>.  
23  
24
- 25 106. Polaski AM, Phelps AL, Kostek MC, Szucs KA, Kolber BJ. Exercise-induced  
26 hypoalgesia: A meta-analysis of exercise dosing for the treatment of chronic pain. *PloS one.*  
27 2019;14(1):e0210418-e. doi: 10.1371/journal.pone.0210418. PubMed PMID: 30625201.  
28
- 29 107. Almirall D, Compton SN, Gunlicks-Stoessel M, Duan N, Murphy SA. Designing a pilot  
30 sequential multiple assignment randomized trial for developing an adaptive treatment strategy.  
31 *Statistics in medicine.* 2012;31(17):1887-902. Epub 2012/03/23. doi: 10.1002/sim.4512. PubMed  
32 PMID: 22438190; PubMed Central PMCID: PMC3399974.  
33
- 34 108. Klasnja P, Smith S, Seewald NJ, Lee A, Hall K, Luers B, et al. Efficacy of Contextually  
35 Tailored Suggestions for Physical Activity: A Micro-randomized Optimization Trial of  
36 HeartSteps. *Annals of behavioral medicine : a publication of the Society of Behavioral Medicine.*  
37 2018. Epub 2018/09/08. doi: 10.1093/abm/kay067. PubMed PMID: 30192907.  
38  
39
- 40 109. Nahum-Shani I, Smith SN, Spring BJ, Collins LM, Witkiewitz K, Tewari A, et al. Just-  
41 in-Time Adaptive Interventions (JITAI) in Mobile Health: Key Components and Design  
42 Principles for Ongoing Health Behavior Support. *Annals of behavioral medicine : a publication*  
43 *of the Society of Behavioral Medicine.* 2018;52(6):446-62. Epub 2016/09/25. doi:  
44 10.1007/s12160-016-9830-8. PubMed PMID: 27663578; PubMed Central PMCID:  
45 PMC3399974.  
46  
47
- 48 110. Falcone T, Mascha E. The elusive diagnostic test for endometriosis. *Fertility and sterility.*  
49 2003;80(4):886-8.  
50
- 51 111. Marian S, Hermanowicz-Szamatowicz K. Endometriosis—a decade later—still an  
52 enigmatic disease. What is the new in the diagnosis and treatment? *Gynecological*  
53 *Endocrinology.* 2020;36(2):104-8.  
54  
55  
56  
57  
58  
59  
60

1  
2  
3 112. Fourquet J, Zavala DE, Missmer S, Bracero N, Romaguera J, Flores I. Disparities in  
4 healthcare services in women with endometriosis with public vs private health insurance.  
5 American Journal of Obstetrics & Gynecology. 2019;221(6):623.e1-e11. doi:  
6 10.1016/j.ajog.2019.06.020.  
7

8  
9 113. Grimmer-Somers K, Vipond N, Kumar S, Hall G. A review and critique of assessment  
10 instruments for patients with persistent pain. Journal of pain research. 2009;2:21.  
11  
12  
13  
14  
15  
16  
17  
18  
19  
20  
21  
22  
23  
24  
25  
26  
27  
28  
29  
30  
31  
32  
33  
34  
35  
36  
37  
38  
39  
40  
41  
42  
43  
44  
45  
46  
47  
48  
49  
50  
51  
52  
53  
54  
55  
56  
57  
58  
59  
60

For peer review only

Table 1. Study Sample Characteristics.

| Characteristic (N)                     | Mean (SD) / Frequency (%)                                  |
|----------------------------------------|------------------------------------------------------------|
| Age (827)                              | 31.0 (7.26), Median=30.6 (MAD=7.41),<br>Range= 14.3-62.9   |
| BMI (787)                              | 25.9 (6.98), Median=24.1 (MAD=4.74),<br>Range= 16.01-72.24 |
| <u>Type of endometriosis diagnosis</u> |                                                            |
| Surgery (702)                          | 69.57 %                                                    |
| Clinician (200)                        | 19.82 %                                                    |
| Self-diagnosis (107)                   | 10.60 %                                                    |
| <u>Work Environment</u>                |                                                            |
| Home (218)                             | 26.42 %                                                    |
| Outside (570)                          | 69.09 %                                                    |
| Unknown (221)                          | 21.29 %                                                    |
| <u>Living environment</u>              |                                                            |
| Rural (129)                            | 15.27 %                                                    |
| Suburban (340)                         | 41.21 %                                                    |
| Urban (363)                            | 44.00 %                                                    |
| Unknown (161)                          | 19.5 %                                                     |
| <u>Relationship status</u>             |                                                            |
| Married/domestic partnership (442)     | 53.57 %                                                    |
| Separated/divorced (28)                | 3.39 %                                                     |
| Single/never married (310)             | 37.57 %                                                    |

1  
2  
3                                      Unknown (229)                                      22.69 %  
4  
5

6                                      Education Level  
7

8                                      College or higher (547)                                      66.30 %  
9

10                                     High school graduate or less (74)                                      8.96 %  
11

12                                     Some college (209)                                      25.33 %  
13

14                                     Unknown (179)                                      17.7 %  
15  
16

17                                     Employment Status  
18

19                                     Employed (541)                                      65.57 %  
20

21                                     Not employed (120)                                      14.54 %  
22

23                                     Student (129)                                      15.63 %  
24

25                                     Unknown (219)                                      21.70 %  
26  
27

28                                     Race/Ethnicity  
29

30                                     White, Non-Hispanic (699)                                      84.72 %  
31

32                                     Black, Non-Hispanic (20)                                      2.42 %  
33

34                                     Asian (22)                                      2.6 %  
35

36                                     Native American (6)                                      0.72 %  
37

38                                     Hispanic (38)                                      4.6 %  
39

40                                     Other (51)                                      6.18 %  
41

42                                     Unknown (173)                                      17.14 %  
43  
44

45                                     Country of Residence  
46  
47

48                                     United States (444)                                      44.0 %  
49

50                                     United Kingdom (83)                                      8.22 %  
51

52                                     Canada (75)                                      7.43 %  
53  
54  
55  
56  
57  
58

1  
2  
3  
4  
5  
6  
7  
8  
9  
10  
11  
12  
13  
14  
15  
16  
17  
18  
19  
20  
21  
22  
23  
24  
25  
26  
27  
28  
29  
30  
31  
32  
33  
34  
35  
36  
37  
38  
39  
40  
41  
42  
43  
44  
45  
46  
47  
48  
49  
50  
51  
52  
53  
54  
55  
56  
57  
58  
59  
60

|                  |         |
|------------------|---------|
| Australia (59)   | 5.84 %  |
| Germany (38)     | 3.76 %  |
| New Zealand (34) | 3.36 %  |
| Other (69)       | 6.83 %  |
| Unknown (207)    | 20.51 % |

For peer review only

Table 2. Sample Study Scores on Standard Measures of Pain and Exercise.

| <u>EPQ-S Measures (N)</u>                  | <u>Mean (SD)</u> |
|--------------------------------------------|------------------|
| SF-36 Bodily Pain (375)                    | 35.47 (22.33)    |
| Pelvic-abdominal pain VAS (316)            | 7.37 (1.97)      |
| NHS-II PA Scale Total Weekly Minutes (359) | 175.2 (280.2)    |
| NHS-II PA Scale Total Weekly EE (359)      | 16.13 (30.37)    |

For peer review only

Table 3. Results of the regression model estimating day-level total pain score (N=1,009).

| <b>Conditional Random Effects</b>                         |  | <b>Variance (95% CI)</b>   |                      |                |
|-----------------------------------------------------------|--|----------------------------|----------------------|----------------|
| Participant                                               |  | 1.09 (0.98, 1.21)          |                      |                |
| <b>Conditional Fixed Effects</b>                          |  | <b>Rate Ratio (95% CI)</b> | <b>Log Odds (SE)</b> | <b>z-score</b> |
| Intercept                                                 |  | 4.26*** (3.26, 5.56)       | 1.45*** (0.13)       | 10.82          |
| Menstrual Status                                          |  | 1.29*** (1.25, 1.32)       | 0.25*** (0.01)       | 20.31          |
| Previous Day Pain                                         |  | 1.02*** (1.02, 1.03)       | 0.02*** (0.00)       | 29.69          |
| Body Mass Index                                           |  | 1.01* (1.00, 1.02)         | 0.01 (0.00)          | 2.02           |
| Mean Weekly Exercise Frequency                            |  | 0.93* (0.89, 0.97)         | -0.06** (0.02)       | -2.96          |
| Previous Day exercise                                     |  | 1.10* (1.05, 1.15)         | 0.09** (0.15)        | 3.88           |
| Some College Education Level                              |  | 0.87 (0.83, 1.56)          | 0.13 (0.15)          | 0.86           |
| College or Higher Education Level                         |  | 0.93 (0.66, 1.16)          | -0.13 (0.14)         | -0.92          |
| Mean Weekly Exercise Frequency *<br>Previous Day exercise |  | 0.96** (0.95, 0.98)        | -0.03** (0.01)       | -3.37          |
| <b>Zero Inflation Terms</b>                               |  | <b>Rate Ratio (95% CI)</b> | <b>Log Odds (SE)</b> | <b>z-score</b> |
| Intercept                                                 |  | 0.17 (0.16, 0.18)          | -1.73*** (0.02)      | -62.96         |
| Same Day Exercise                                         |  | 5.34 (5.01, 5.68)          | 1.67*** (0.03)       | 52.53          |

95% CI=95% Confidence Interval. \*p<0.05 \*\* p<0.001, \*\*\*p<0.0001. Previous day pain and BMI were sample mean-centered. BMI and education level were kept as covariates in the model based on their significant associations with mean day-level pain scores (Pearson's  $r=0.15$  for BMI and Kruskal-Wallis  $\chi^2 = 18.061$  for education level,  $p<0.001$ ).

Table 4. Results of the regression model estimating pain score difference (N=1,009).

| <b>Conditional Random Effects</b> |  | <b>Variance (95% CI)</b>  |               |                |
|-----------------------------------|--|---------------------------|---------------|----------------|
| Participant (Intercept)           |  | 9.16 (8.28, 10.13)        |               |                |
| Residual                          |  | 26.83                     |               |                |
| <b>Conditional Fixed Effects</b>  |  | <b>B coefficient (SE)</b> | <b>95% CI</b> | <b>z-score</b> |
| Intercept                         |  | 2.70*** (0.51)            | 1.68, 3.72    | 5.29           |
| Menstrual Status                  |  | 1.47*** (0.09)            | 1.28, 1.66    | 15.43          |
| Previous Day Pain                 |  | -0.86*** (0.01)           | -0.87, -0.85  | -143.43        |
| Body Mass Index                   |  | 0.05* (0.01)              | 0.01, 0.10    | 2.86           |
| Mean Weekly Exercise Frequency    |  | -0.27** (0.08)            | -0.44, -0.10  | -3.12          |
| Previous Day Exercise             |  | 0.92** (0.18)             | 0.56, 1.27    | 5.08           |
| Some College Education Level      |  | -0.84 (0.62)              | -2.11, 0.42   | -1.35          |
| College or Higher Education Level |  | -2.07** (0.52)            | -3.10, -1.03  | -3.96          |
| Mean Weekly Exercise Frequency *  |  | -0.14* (0.06)             | -0.26, -0.01  | -2.22          |
| Previous Day Exercise             |  |                           |               |                |
| <b>Zero Inflation Terms</b>       |  | <b>B coefficient</b>      | <b>95% CI</b> | <b>z-score</b> |
| Intercept                         |  | -0.91*** (0.01)           | -0.93, -0.88  | -63.84         |
| Same Day Exercise                 |  | 0.70*** (0.02)            | 0.66, 0.75    | 32.09          |

SE= Standard Error. \* $p < 0.05$  \*\*  $p < 0.001$ , \*\*\* $p < 0.0001$ . Previous day pain and BMI were sample mean-centered. BMI and education level were kept as covariates in the model based on their significant associations with mean day-level pain scores (Pearson's  $r = 0.15$  for BMI and Kruskal-Wallis  $\chi^2 = 18.061$  for education level,  $p < 0.001$ ).



1  
2  
3 Figure 1. Prevalence of pain severity by location reported among participants (i.e., unique counts  
4 of body area-severity per participant). Moderate intensity was the most frequently tracked across  
5 all body areas (14.1%-85.4%).  
6

7  
8 Figure 2. Prevalence of self-reported exercise modalities in the study sample. “Other  
9 cardiovascular” category include activities such as dancing, aerobics and using the elliptical  
10 machine. “Muscle strength and endurance” category includes activities such as weight lifting and  
11 calisthenics. “Other exercise” category includes sports activities such as skiing and soccer, multi-  
12 modal exercises (e.g., high intensity interval training of both cardiovascular and muscular  
13 endurance), or those that did not fit into the other categories (e.g., stabilizing or balancing  
14 exercises, wii fit or other home based fitness activities).  
15

16  
17 Panel Figure 3. Moderation of effect of previous-day exercise by habitual exercise levels (X  
18 axes). Y axes represent predicted day-level total scores (top) and differences (bottom) in pain.  
19 Shaded areas depict 95% confidence intervals. At approximately 3 times/week of regular  
20 exercise, previous day exercise starts to be associated with more favorable pain outcomes on the  
21 following day (i.e., decrease from the model predicted mean scores), adjusted for other day-level  
22 and person level factors.  
23

24  
25 Figure 4. Plot of the random effect of the participant on total day pain scores estimated from the  
26 multilevel model (N=1,009). Y-axis represents the range of estimated average pain scores for  
27 each participant. Each black dot represents one participant’s mean (i.e., random intercept), grey  
28 lines indicate 95% confidence intervals. Distribution of points across the x-axis indicate large  
29 variability across individuals (i.e., between-group variance), and the grey lines indicate the  
30 within-person variability in daily scores over time.  
31  
32  
33  
34  
35  
36  
37  
38  
39  
40  
41  
42  
43  
44  
45  
46  
47  
48  
49  
50  
51  
52  
53  
54  
55  
56  
57  
58  
59  
60

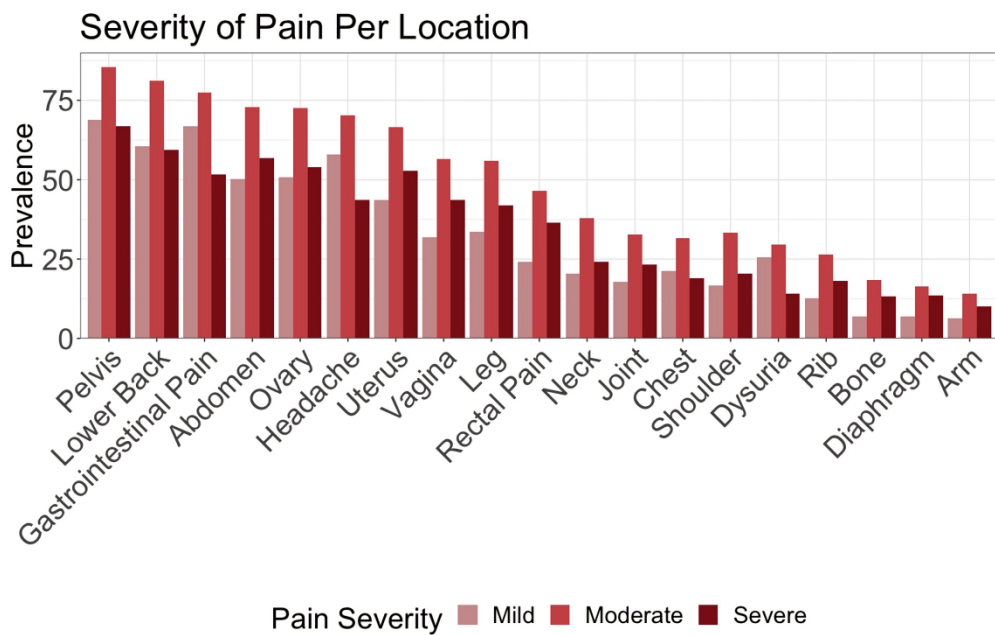

776x493mm (72 x 72 DPI)

1  
2  
3  
4  
5  
6  
7  
8  
9  
10  
11  
12  
13  
14  
15  
16  
17  
18  
19  
20  
21  
22  
23  
24  
25  
26  
27  
28  
29  
30  
31  
32  
33  
34  
35  
36  
37  
38  
39  
40  
41  
42  
43  
44  
45  
46  
47  
48  
49  
50  
51  
52  
53  
54  
55  
56  
57  
58  
59  
60

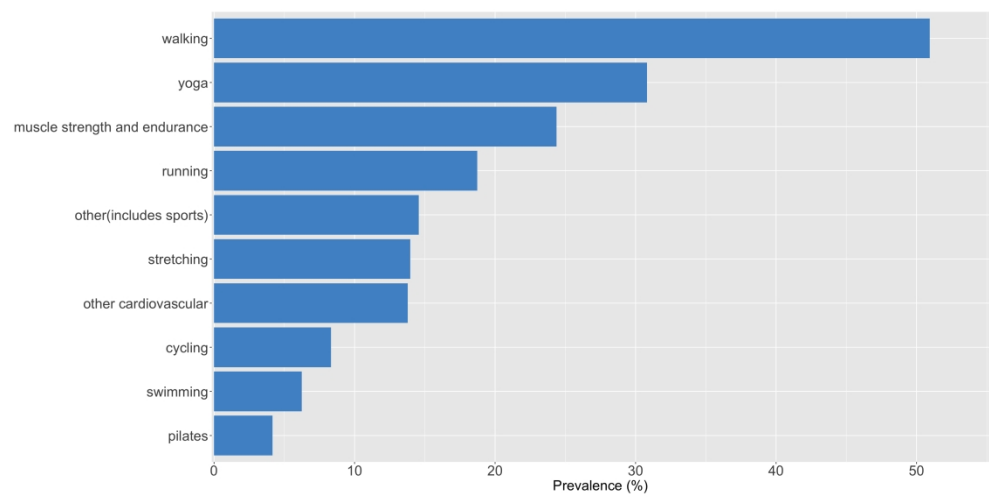

1411x705mm (72 x 72 DPI)

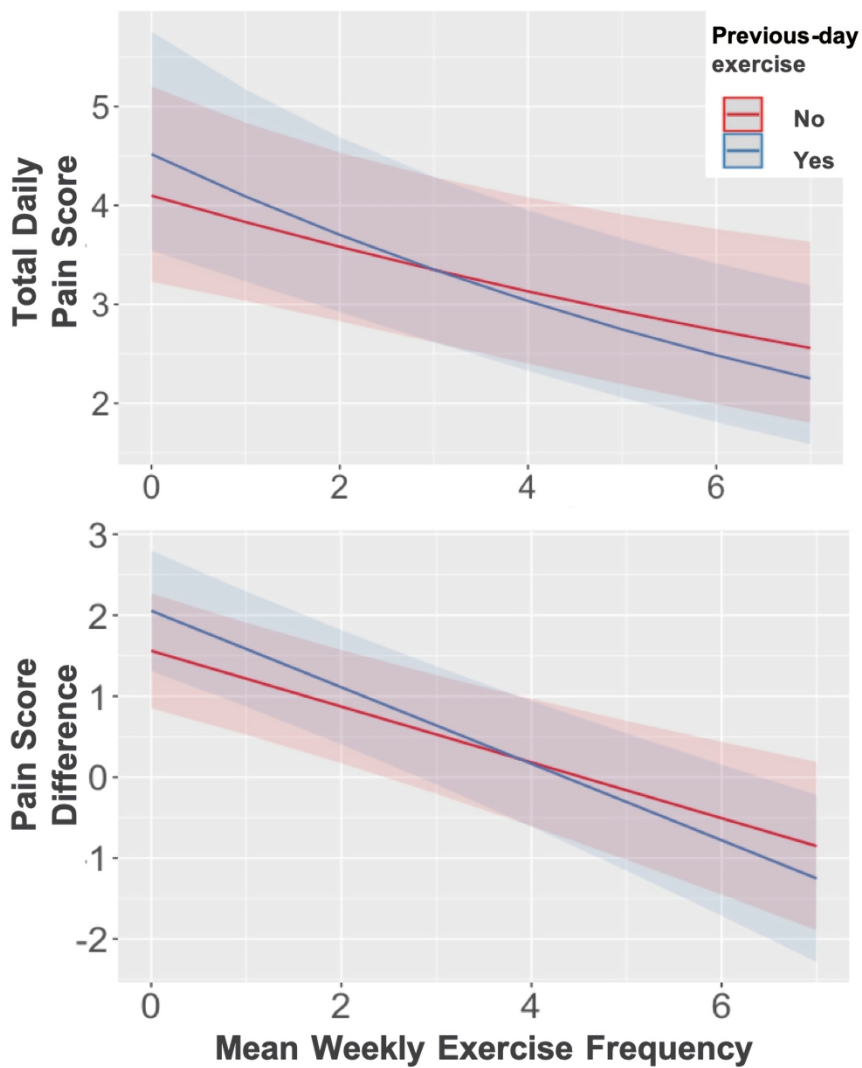

694x750mm (72 x 72 DPI)

1  
2  
3  
4  
5  
6  
7  
8  
9  
10  
11  
12  
13  
14  
15  
16  
17  
18  
19  
20  
21  
22  
23  
24  
25  
26  
27  
28  
29  
30  
31  
32  
33  
34  
35  
36  
37  
38  
39  
40  
41  
42  
43  
44  
45  
46  
47  
48  
49  
50  
51  
52  
53  
54  
55  
56  
57  
58  
59  
60

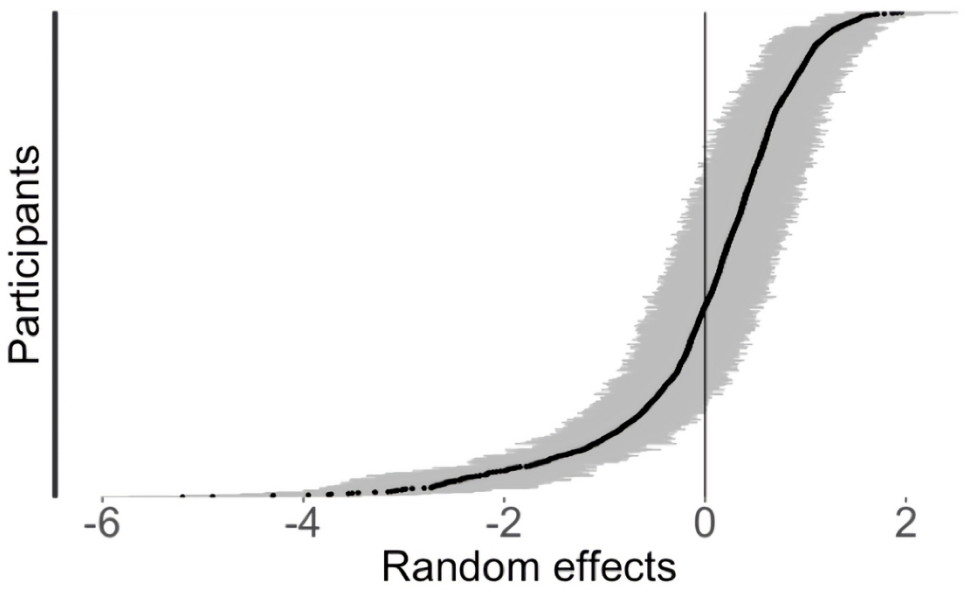

571x339mm (72 x 72 DPI)

## Supplementary File 1. Missing Data Imputations.

Phendo is an observational research app and participants do not receive prompts from the research team to track any given item at a certain time. They are free to track (or not track) any given item as they wish. Consequently, missingness in the data occurs due to a variety of possible reasons that are not always known or easy to distinguish. For example, a period not tracked for a day could mean that the participant did not have a period, or they chose not to track, or did not use the app at all that day. To circumvent this issue, we took several measures. First, we limited data to days for which the participant tracked their pain, exercise and menstrual status at least once, as a proxy for app use. Next, we assigned a score of zero for pain on days where the participant had tracked exercise or menstrual status but not pain. This approach is motivated by 2 reasons. First, the nature of the pain question in Phendo (i.e., “Where is the pain?”, “How severe is the pain?”) assumes the participants to track when they feel pain and therefore a “No Pain” response is neither available in the app nor would make sense. Second, multiple imputation methods impute such that the resulting imputations are limited to the observed values and distributions. Thus by default it would omit the possibility of a zero in the resultant pain score distribution, which increases risk of overestimation of the scores in the sample.

BMI (calculated from participant reported height and weight) and education level were missing for 22% and 19% of the participants, respectively, and menstrual status was missing (i.e., not tracked) 22% of the time in the dataset. We imputed these 3 variables using multivariate imputations by chained equations [1] according to the heteroscedastic linear two-level structure of the data (i.e., hierarchical where, participant is the clustering variable) following standard multilevel multiple imputation methods. [1-4] We used two-level predictive mean matching for

1  
2  
3 BMI and education level, which is a semi-parametric imputation method that limits imputations  
4 to the observed values and can preserve non-linear relations in the observed data, therefore the  
5 imputations do not deviate from the observed distribution[5] and two-level logistic regression for  
6 imputing menstrual status, using the rest of the dataset as the predictors. As per published  
7 recommendations,[1, 2] we also included the raw pain variable (i.e., with the missing values) as a  
8 predictor, to account for the possibility of an association between the missingness pattern of pain  
9 to these imputed variables. To assess the plausibility of the imputations and any significant  
10 deviance from the structure of the raw, non-imputed data, we inspected the imputation  
11 convergence plots, distributions of the imputed variables which are provided in Supplementary  
12 Figures 3 and 4.  
13  
14  
15  
16  
17  
18  
19  
20  
21  
22  
23  
24  
25

26 *Model specification.* We used a zero-inflated negative binomial (ZINB) distribution when  
27 modeling the total pain outcome, as it has been demonstrated to provide the best fit for outcomes  
28 with over-dispersion and zero-inflation.[6-8] ZINB models consider two sources of zero  
29 observations: “sampling zeros” that are part of the underlying sampling distribution (i.e.,  
30 negative binomial) and “structural zeros” that cannot score anything other than zero (i.e.,  
31 participant did not track).[6] This virtue of the ZINB models allows for specification of the  
32 imputed zeros and prevents the risk of over-estimating effects and generates more conservative  
33 estimates for predictors of interest by estimating a separate zero-inflation term, as well as  
34 conditional model.[6] We specified the zero-inflation term such that it was dependent on the  
35 exercise variable for the day, in addition to specifying an overall general zero-inflation structure  
36 in the outcome through inclusion of an intercept, based on recommendations. [8] Menstrual  
37 status was not a significant predictor of zero-inflation and therefore removed from the zero-  
38 inflation term during the modeling process. We included participants who had at least 11 pairs of  
39  
40  
41  
42  
43  
44  
45  
46  
47  
48  
49  
50  
51  
52  
53  
54  
55  
56  
57  
58  
59  
60

consecutive days of data in the final analytic sample as this provided sufficient amount of data to

1) ensure model convergence and improve reliability and accuracy of the estimates, particularly the random effects and their variances[9-12], and 2) adequately infer participants' habitual weekly exercise frequency by considering at least three weeks' worth of tracking to compute the weekly exercise frequency.

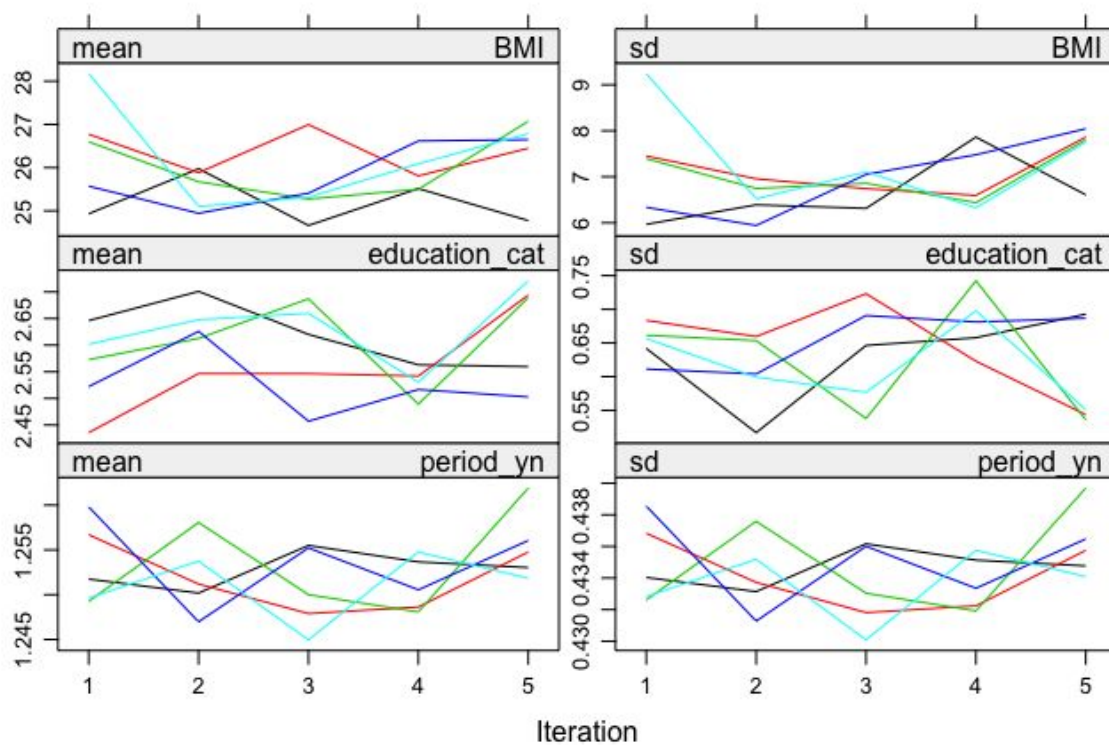

Supplementary Figure 3. Convergence plots for the 3 imputed variables (BMI, top; education, middle; menstrual status, bottom) with means on the left and standard deviations on the right side of the panel. Plots indicate healthy convergence based on lack significant trend and the streams mingling well right from the start throughout the 5 iterations (x-axis).



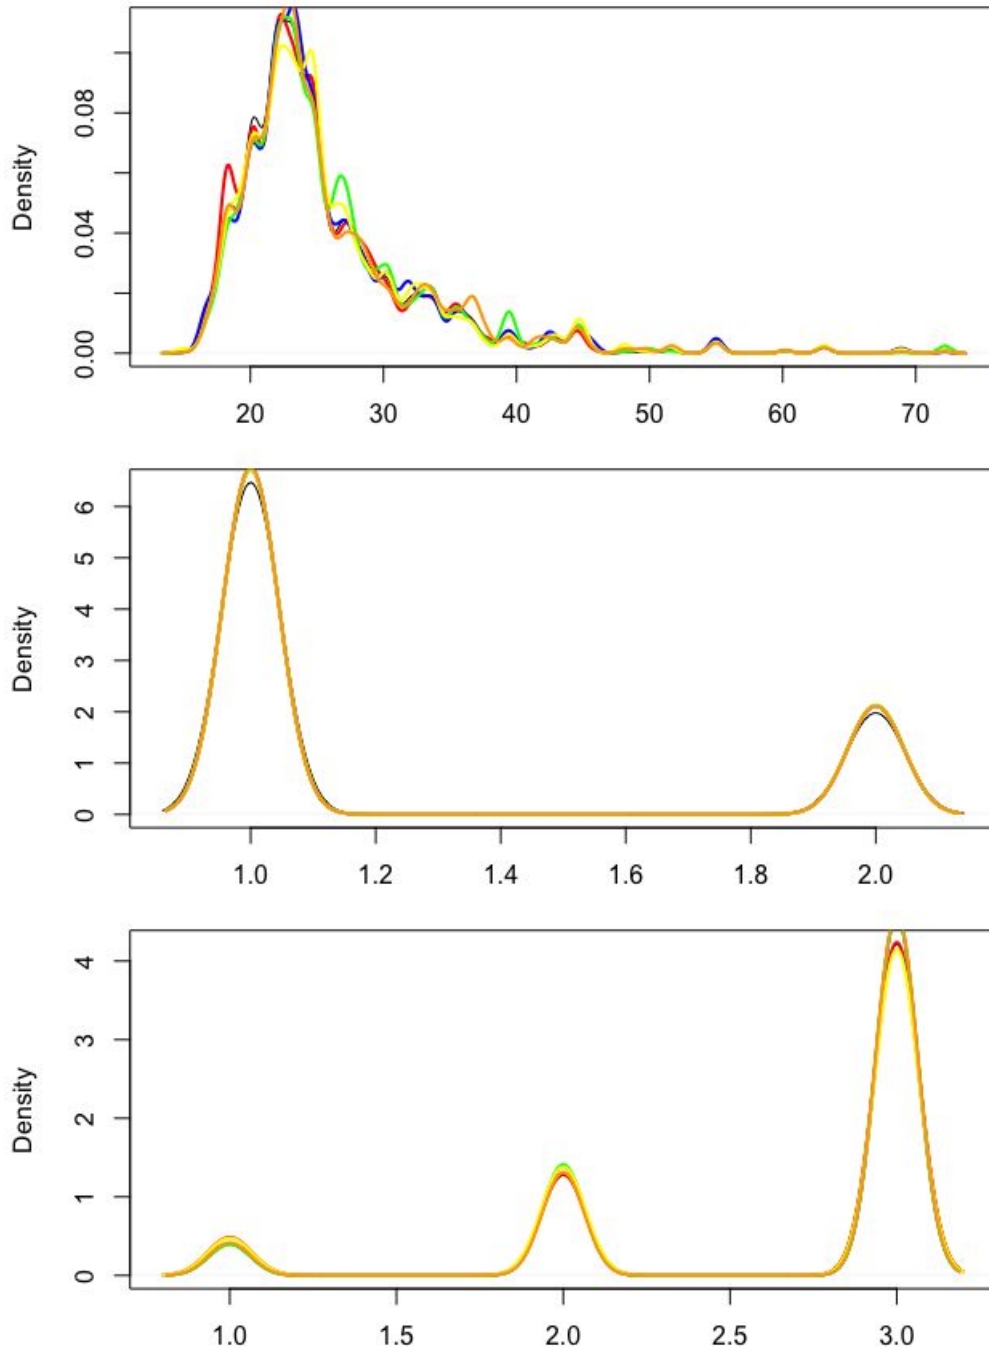

Supplementary Figure 4. Density plots of the marginal distributions of BMI (top), menstrual status (middle), and education category (bottom) of raw, non-imputed data and 5 iterations of the imputed data. Close super-imposition of the curves indicate that the imputed data distributions match those of raw data.

## Supplementary File 2. Imputation Model diagnostics.

Appropriateness and plausibility of the estimates from imputed models were inspected following published guidelines. First, we used measures of missing data information to assess pooled estimate variances. The fraction of missing information ( $\lambda$ ) is interpreted as the proportion of variation in the parameter of interest due to the missing data. The relative increase in variance due to nonresponse ( $r$ ) is interpreted as the proportional increase in the sampling variance of the parameter of interest that is due to the missing data. Values of  $\lambda$  over 0.5 indicate that the influence of the imputation model on the results is larger than that of the complete-data model, suggesting potential problems in the imputations. Supplementary Table 1 provides results of these variance estimates, indicating satisfactory imputation and model fit.

**Supplementary Table 1. Measures of Missing data information**

| <b>Conditional Fixed Effects</b>  | <b>Total Pain Score</b> |      | <b>Difference in Pain</b> |      |
|-----------------------------------|-------------------------|------|---------------------------|------|
|                                   | $\lambda$               | $r$  | $\lambda$                 | $r$  |
| Intercept                         | 0.21                    | 0.27 | 0.23                      | 0.31 |
| Menstrual Status                  | 0.13                    | 0.15 | 0.19                      | 0.23 |
| Previous Day Pain                 | 0.01                    | 0.01 | 0.00                      | 0.00 |
| Body Mass Index                   | 0.13                    | 0.15 | 0.23                      | 0.31 |
| Mean Weekly Exercise Frequency    | 0.00                    | 0.00 | 0.01                      | 0.01 |
| Previous Day exercise             | 0.01                    | 0.01 | 0.00                      | 0.00 |
| Some College Education Level      | 0.26                    | 0.36 | 0.35                      | 0.55 |
| College or Higher Education Level | 0.23                    | 0.31 | 0.21                      | 0.28 |
| Mean Weekly Exercise Frequency *  | 0.00                    | 0.00 | 0.00                      | 0.00 |
| Previous Day exercise             |                         |      |                           |      |
| <b>Zero Inflation Terms</b>       |                         |      |                           |      |
| Intercept                         | 0.00                    | 0.00 | 0.00                      | 0.00 |
| Same Day Exercise                 | 0.00                    | 0.00 | 0.00                      | 0.00 |

Next, we inspected propensity scores, which is a more recent and increasingly accepted method for inspecting the suitability of data imputation.[2, 13, 14] The goal is to compare the distributions of observed and imputed data conditional on the missingness probability. Under the missing at random (MAR) assumption, the conditional distributions of the observed and missing data should be similar if the assumed model for creating multiple imputations has a good fit. To do this, we first estimate the probability of each record being incomplete (i.e., “response propensity”) in the presence of missing data by conditioning on the response indicators as well as the observed covariates. The probabilities are then averaged over the imputed datasets to obtain stability. Supplementary Figure 3 plots BMI, education category and menstrual status against the propensity score in each dataset. The distributions of the blue

and red points are match up well without significant discrepancies (e.g., mismatch in patterns, imputed data systematically shifted toward one side of the axis).

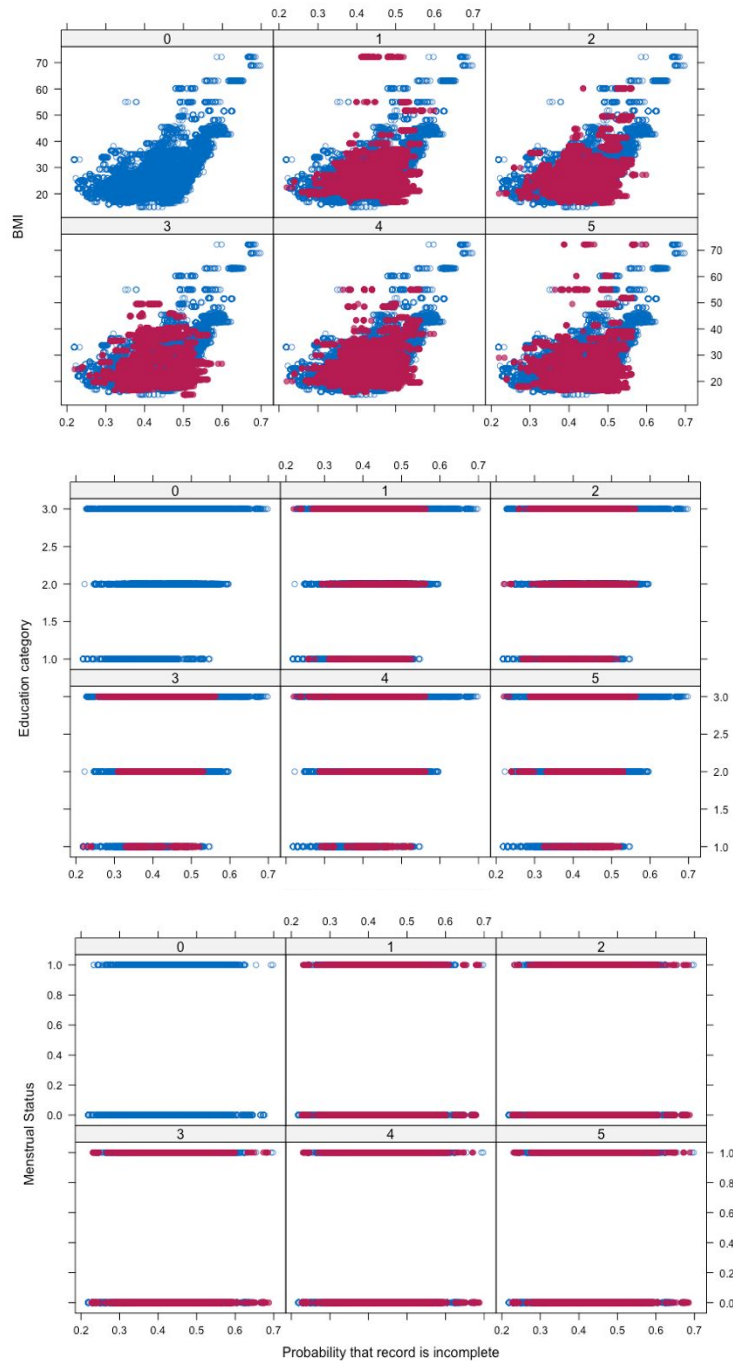

Supplementary Figure 5. BMI (top), education category (middle) and menstrual status (bottom) plotted against the propensity score in each dataset (0=observed, 1-5=imputed). The distributions of the blue (observed) and red (imputed) points are follow similar patterns.

Supplementary Table 2. Post-hoc analyses with endometriosis diagnosis included as a covariate. Conditional model results of the negative binomial model estimation of day-level total pain score (N=608).

| <b>Random Effects</b>                                | <b>Variance (95% CI)</b> |                |
|------------------------------------------------------|--------------------------|----------------|
| Participant (Intercept)                              | 1.10 (0.99, 1.22)        |                |
| <b>Fixed Effects</b>                                 | <b>Log Odds (SE)</b>     | <b>z-score</b> |
| Intercept                                            | 1.37*** (0.12)           | 10.97          |
| Menstrual Status                                     | 0.25*** (0.01)           | 21.40          |
| Previous day Pain                                    | 0.02*** (0.01)           | 21.40          |
| Body Mass Index                                      | 0.01* (0.004)            | 2.81           |
| Mean weekly Exercise Frequency                       | -0.06** (0.02)           | -3.01          |
| Previous day exercise                                | 0.09** (0.02)            | 3.85           |
| Clinician diagnosis of endometriosis                 | -0.07 (0.10)             | 0.01           |
| Self-diagnosis of endometriosis                      | -0.11 (0.11)             | -1.01          |
| Some college education level                         | 0.22 (0.13)              | -1.63          |
| College or higher education level                    | -0.01 (0.12)             | -0.12          |
| Mean weekly Exercise Frequency*Previous day exercise | -0.03*** (0.01)          | -3.42          |

SE=Standard Error. \*p=0.001, \*\* p <0.001, \*\*\*p<0.0001. B coefficients are rate ratios. BMI =Body Mass Index. BMI and previous day pain were group mean centered.

Supplementary Table 3. Post-hoc analyses with endometriosis diagnosis included as a covariate. Conditional model results of the regression model estimation of pain score difference (N=1009).

| <b>Conditional Random Effects</b>                    | <b>Variance (95% CI)</b>  |                |
|------------------------------------------------------|---------------------------|----------------|
| Participant (Intercept)                              | 13.34 (12.09, 14.93)      |                |
| <b>Fixed Effects</b>                                 | <b>B coefficient (SE)</b> | <b>z-score</b> |
| Intercept                                            | 2.45*** (0.46)            | 5.22           |
| Menstrual status                                     | 1.46*** (0.08)            | 16.98          |
| Previous day pain                                    | -0.86*** (0.01)           | -144.11        |
| Body mass index                                      | 0.07* (0.01)              | 4.47           |
| Mean weekly exercise frequency                       | -0.27** (0.09)            | -3.03          |
| Previous day exercise                                | 0.92*** (0.18)            | 5.13           |
| Clinician diagnosis of endometriosis                 | -0.05 (0.32)              | -0.16          |
| Self-diagnosis of endometriosis                      | -0.45 (0.43)              | -1.29          |
| Some college education level                         | -0.30 (0.51)              | -0.58          |
| College or higher education level                    | -1.72** (0.47)            | -3.67          |
| Mean weekly exercise frequency*Previous day exercise | -0.14* (0.06)             | -2.31          |

SE=Standard Error. \*p<0.05, \*\* p <0.01, \*\*\*p<0.0001. Body Mass Index and previous day pain were group mean centered.

### References

1. van Buuren S, Groothuis-Oudshoorn K. mice: Multivariate Imputation by Chained Equations in R. Journal of Statistical Software; Vol 1, Issue 3 (2011). 2011.
2. Van Buuren S. Flexible imputation of missing data: CRC press; 2018.
3. Grund S, Lüdtke O, Robitzsch A. Multiple imputation of missing data for multilevel models: Simulations and recommendations. Organizational Research Methods. 2018;21(1):111-49.
4. Barnard J, Rubin DB. Small-Sample Degrees of Freedom with Multiple Imputation. Biometrika. 1999;86(4):948-55.
5. Little RJ. Missing-data adjustments in large surveys. Journal of Business & Economic Statistics. 1988;6(3):287-96.

6. Hu M-C, Pavlicova M, Nunes EV. Zero-inflated and hurdle models of count data with extra zeros: examples from an HIV-risk reduction intervention trial. *Am J Drug Alcohol Abuse*. 2011;37(5):367-75. doi: 10.3109/00952990.2011.597280. PubMed PMID: 21854279.
7. Brooks ME, Kristensen K, van Benthem KJ, Magnusson A, Berg CW, Nielsen A, et al. glmmTMB balances speed and flexibility among packages for zero-inflated generalized linear mixed modeling. *The R journal*. 2017;9(2):378-400.
8. Brooks ME, Kristensen K, van Benthem KJ, Magnusson A, Berg CW, Nielsen A, et al. Modeling zero-inflated count data with glmmTMB. *bioRxiv*. 2017:132753. doi: 10.1101/132753.
9. Schunck R. Cluster Size and Aggregated Level 2 Variables in Multilevel Models. A Cautionary Note. 2016. 2016;10(1). Epub 2016-07-20. doi: 10.12758/mda.2016.005.
10. Bell B, Ferron J, Kromrey J, editors. *Cluster Size in Multilevel Models: The Impact of Sparse Data Structures on Point and Interval Estimates in Two-Level Models* 2008.
11. Austin PC, Leckie G. The effect of number of clusters and cluster size on statistical power and Type I error rates when testing random effects variance components in multilevel linear and logistic regression models. *Journal of Statistical Computation and Simulation*. 2018;88(16):3151-63. doi: 10.1080/00949655.2018.1504945.
12. Snijders TAB. Power and sample size in multilevel modeling. In: Everitt B, Howell D, editors. *Encyclopedia of Statistics in Behavioral Science*. 3: Wiley; 2006. p. 1570–3.
13. Nguyen CD, Carlin JB, Lee KJ. Model checking in multiple imputation: an overview and case study. *Emerging Themes in Epidemiology*. 2017;14(1):8. doi: 10.1186/s12982-017-0062-6.
14. Bondarenko I, Raghunathan T. Graphical and numerical diagnostic tools to assess suitability of multiple imputations and imputation models. *Statistics in Medicine*. 2016;35(17):3007-20. doi: <https://doi.org/10.1002/sim.6926>.

1  
2  
3  
4  
5  
6  
7  
8  
9  
10  
11  
12  
13  
14  
15  
16  
17  
18  
19  
20  
21  
22  
23  
24  
25  
26  
27  
28  
29  
30  
31  
32  
33  
34  
35  
36  
37  
38  
39  
40  
41  
42  
43  
44  
45  
46  
47  
48  
49  
50  
51  
52  
53  
54  
55  
56  
57  
58  
59  
60

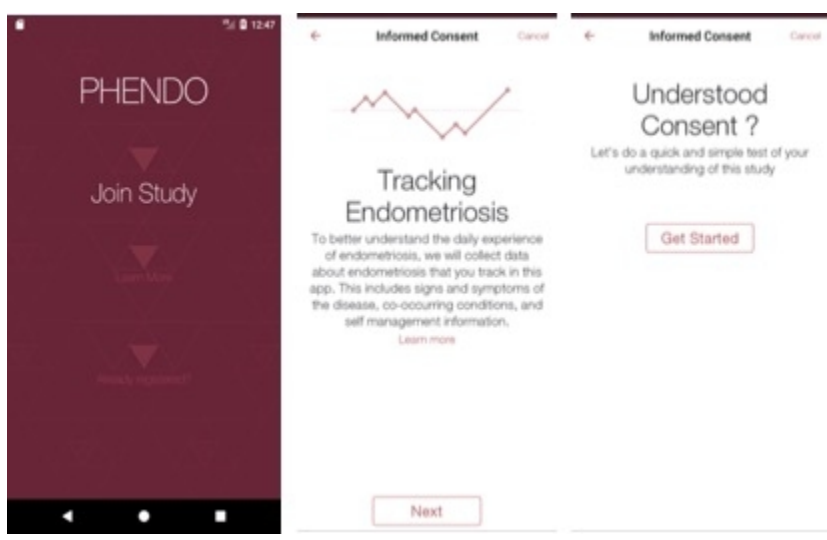

34x22mm (300 x 300 DPI)

1  
2  
3  
4  
5  
6  
7  
8  
9  
10  
11  
12  
13  
14  
15  
16  
17  
18  
19  
20  
21  
22  
23  
24  
25  
26  
27  
28  
29  
30  
31  
32  
33  
34  
35  
36  
37  
38  
39  
40  
41  
42  
43  
44  
45  
46  
47  
48  
49  
50  
51  
52  
53  
54  
55  
56  
57  
58  
59  
60

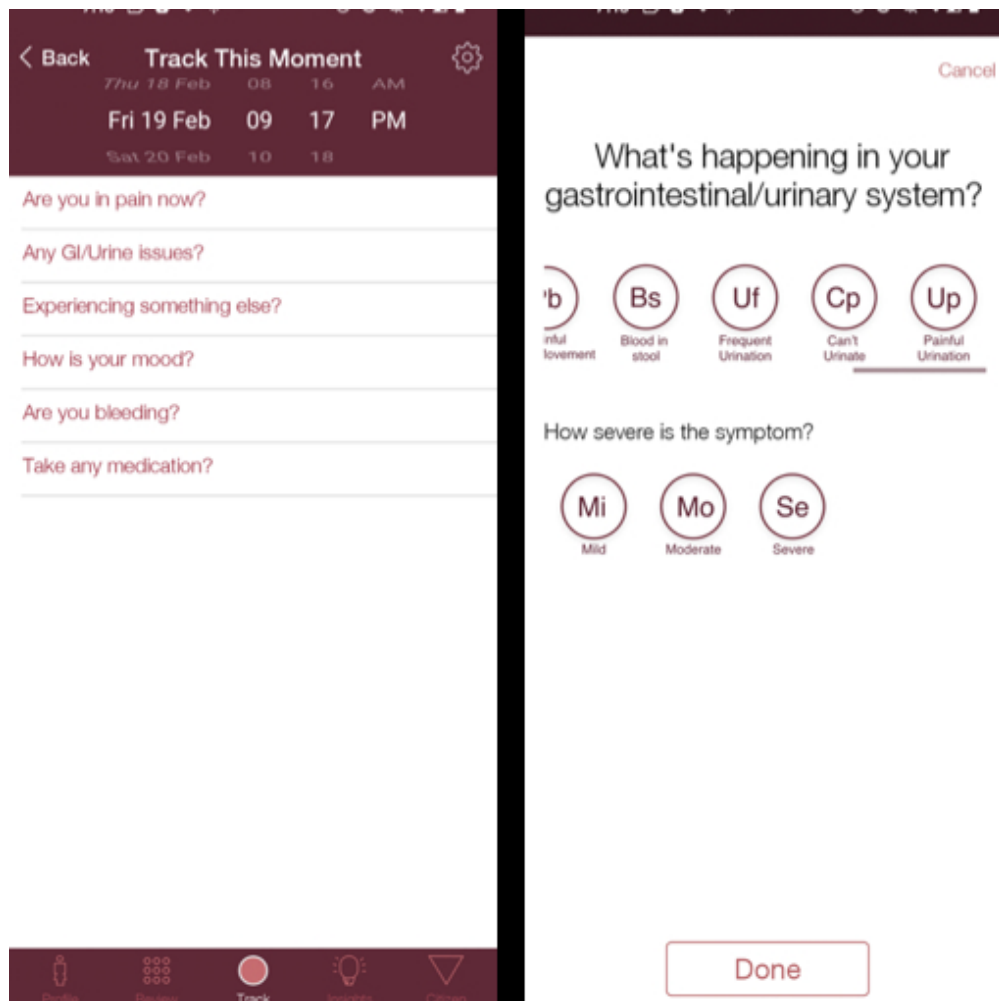

109x109mm (118 x 118 DPI)



1  
2  
3  
4  
5  
6  
7  
8  
9  
10  
11  
12  
13  
14  
15  
16  
17  
18  
19  
20  
21  
22  
23  
24  
25  
26  
27  
28  
29  
30  
31  
32  
33  
34  
35  
36  
37  
38  
39  
40  
41  
42  
43  
44  
45  
46  
47  
48  
49  
50  
51  
52  
53  
54  
55  
56  
57  
58  
59  
60

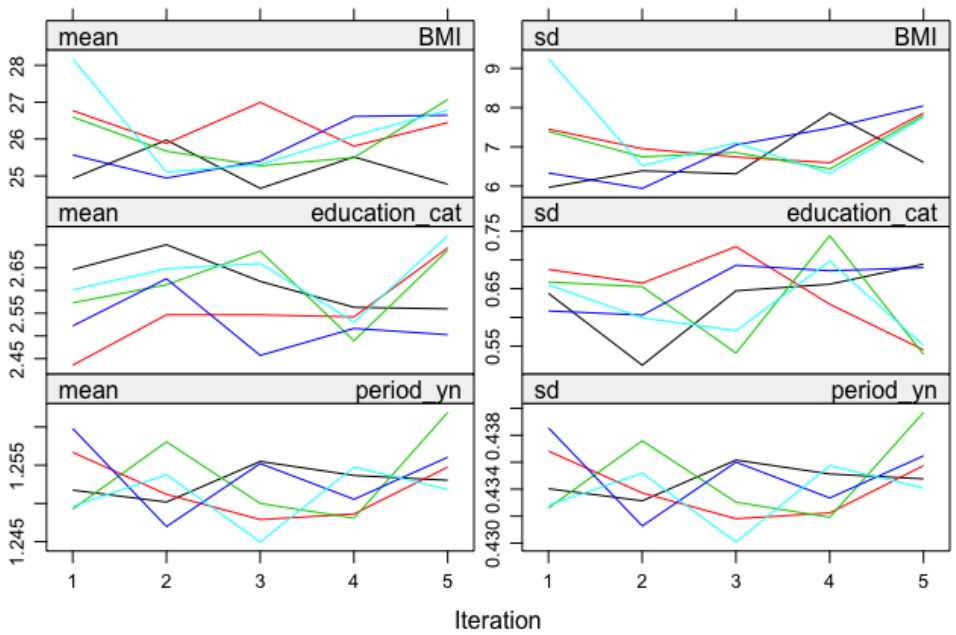

142x99mm (118 x 118 DPI)

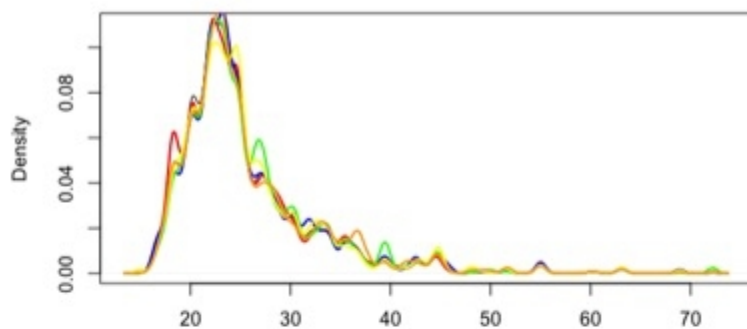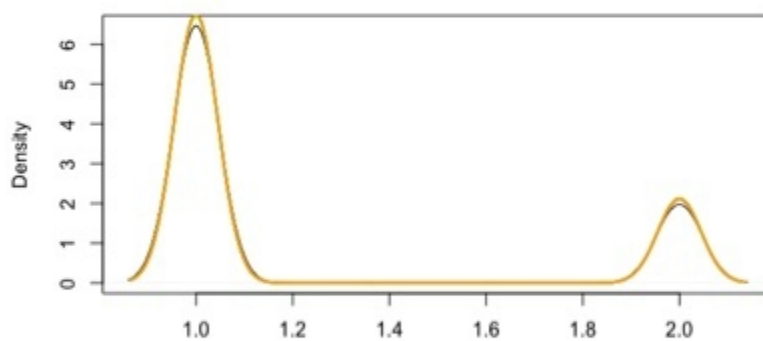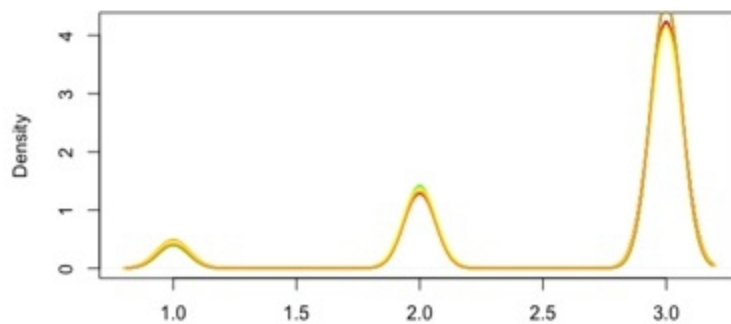

34x45mm (300 x 300 DPI)

1  
2  
3  
4  
5  
6  
7  
8  
9  
10  
11  
12  
13  
14  
15  
16  
17  
18  
19  
20  
21  
22  
23  
24  
25  
26  
27  
28  
29  
30  
31  
32  
33  
34  
35  
36  
37  
38  
39  
40  
41  
42  
43  
44  
45  
46  
47  
48  
49  
50  
51  
52  
53  
54  
55  
56  
57  
58  
59  
60



23x44mm (300 x 300 DPI)

## STROBE Statement—checklist of items that should be included in reports of observational studies

|                           | Item No. | Recommendation                                                                                                                                                                                                                                                                                                                                                                                                                                                         | Page # where this item is located: |
|---------------------------|----------|------------------------------------------------------------------------------------------------------------------------------------------------------------------------------------------------------------------------------------------------------------------------------------------------------------------------------------------------------------------------------------------------------------------------------------------------------------------------|------------------------------------|
| <b>Title and abstract</b> | 1        | (a) Indicate the study's design with a commonly used term in the title or the abstract                                                                                                                                                                                                                                                                                                                                                                                 | 1,2                                |
|                           |          | (b) Provide in the abstract an informative and balanced summary of what was done and what was found                                                                                                                                                                                                                                                                                                                                                                    | 2                                  |
| <b>Introduction</b>       |          |                                                                                                                                                                                                                                                                                                                                                                                                                                                                        |                                    |
| Background/rationale      | 2        | Explain the scientific background and rationale for the investigation being reported                                                                                                                                                                                                                                                                                                                                                                                   | 5-6                                |
| Objectives                | 3        | State specific objectives, including any prespecified hypotheses                                                                                                                                                                                                                                                                                                                                                                                                       | 7                                  |
| <b>Methods</b>            |          |                                                                                                                                                                                                                                                                                                                                                                                                                                                                        |                                    |
| Study design              | 4        | Present key elements of study design early in the paper                                                                                                                                                                                                                                                                                                                                                                                                                | 8                                  |
| Setting                   | 5        | Describe the setting, locations, and relevant dates, including periods of recruitment, exposure, follow-up, and data collection                                                                                                                                                                                                                                                                                                                                        | 8-9                                |
| Participants              | 6        | (a) <i>Cohort study</i> —Give the eligibility criteria, and the sources and methods of selection of participants. Describe methods of follow-up<br><i>Case-control study</i> —Give the eligibility criteria, and the sources and methods of case ascertainment and control selection. Give the rationale for the choice of cases and controls<br><i>Cross-sectional study</i> —Give the eligibility criteria, and the sources and methods of selection of participants | 7-8                                |
|                           |          | (b) <i>Cohort study</i> —For matched studies, give matching criteria and number of exposed and unexposed                                                                                                                                                                                                                                                                                                                                                               | N/A                                |

|                              |    |                                                                                                                                                                                      |       |
|------------------------------|----|--------------------------------------------------------------------------------------------------------------------------------------------------------------------------------------|-------|
|                              |    | <i>Case-control study</i> —For matched studies, give matching criteria and the number of controls per case                                                                           |       |
| Variables                    | 7  | Clearly define all outcomes, exposures, predictors, potential confounders, and effect modifiers. Give diagnostic criteria, if applicable                                             | 9-11  |
| Data sources/<br>measurement | 8* | For each variable of interest, give sources of data and details of methods of assessment (measurement). Describe comparability of assessment methods if there is more than one group | 9-11  |
| Bias                         | 9  | Describe any efforts to address potential sources of bias                                                                                                                            | 10-11 |
| Study size                   | 10 | Explain how the study size was arrived at                                                                                                                                            | 7-8   |

Continued on next page

|                        |     |                                                                                                                                                                                                                                                                                                           |                             |
|------------------------|-----|-----------------------------------------------------------------------------------------------------------------------------------------------------------------------------------------------------------------------------------------------------------------------------------------------------------|-----------------------------|
| Quantitative variables | 11  | Explain how quantitative variables were handled in the analyses. If applicable, describe which groupings were chosen and why                                                                                                                                                                              | 11-12                       |
| Statistical methods    | 12  | (a) Describe all statistical methods, including those used to control for confounding                                                                                                                                                                                                                     | 12-13                       |
|                        |     | (b) Describe any methods used to examine subgroups and interactions                                                                                                                                                                                                                                       | 12-13                       |
|                        |     | (c) Explain how missing data were addressed                                                                                                                                                                                                                                                               | 13, Supplemental Files 1-2  |
|                        |     | (d) <i>Cohort study</i> —If applicable, explain how loss to follow-up was addressed<br><i>Case-control study</i> —If applicable, explain how matching of cases and controls was addressed<br><i>Cross-sectional study</i> —If applicable, describe analytical methods taking account of sampling strategy | 12-13                       |
|                        |     | (e) Describe any sensitivity analyses                                                                                                                                                                                                                                                                     | 12, and Supplemental Tables |
| <b>Results</b>         |     |                                                                                                                                                                                                                                                                                                           |                             |
| Participants           | 13* | (a) Report numbers of individuals at each stage of study—eg numbers potentially eligible, examined for eligibility, confirmed eligible, included in the study, completing follow-up, and analysed                                                                                                         | 13-14                       |
|                        |     | (b) Give reasons for non-participation at each stage                                                                                                                                                                                                                                                      | 13-14                       |
|                        |     | (c) Consider use of a flow diagram                                                                                                                                                                                                                                                                        | N/A                         |
| Descriptive data       | 14* | (a) Give characteristics of study participants (eg demographic, clinical, social) and information on exposures and potential confounders                                                                                                                                                                  | 13-14, and Table 1          |
|                        |     | (b) Indicate number of participants with missing data for each variable of interest                                                                                                                                                                                                                       | Table 1                     |
|                        |     | (c) <i>Cohort study</i> —Summarise follow-up time (eg, average and total amount)                                                                                                                                                                                                                          | N/A                         |
| Outcome data           | 15* | <i>Cohort study</i> —Report numbers of outcome events or summary measures over time                                                                                                                                                                                                                       | N/A                         |
|                        |     | <i>Case-control study</i> —Report numbers in each exposure category, or summary measures of exposure                                                                                                                                                                                                      | N/A                         |
|                        |     | <i>Cross-sectional study</i> —Report numbers of outcome events or summary measures                                                                                                                                                                                                                        | 14-15                       |
| Main results           | 16  | (a) Give unadjusted estimates and, if applicable, confounder-adjusted estimates and their precision (eg, 95% confidence interval). Make clear which confounders were adjusted for and why they were included                                                                                              | 15-16, Tables 2 and 3       |

1  
2  
3  
4  
5  
6  
7  
8  
9  
10  
11  
12  
13  
14  
15  
16  
17  
18  
19  
20  
21  
22  
23  
24  
25  
26  
27  
28  
29  
30  
31  
32  
33  
34  
35  
36  
37  
38  
39  
40  
41  
42  
43  
44  
45  
46

---

|                                                                                                                  |     |
|------------------------------------------------------------------------------------------------------------------|-----|
| (b) Report category boundaries when continuous variables were categorized                                        | N/A |
| (c) If relevant, consider translating estimates of relative risk into absolute risk for a meaningful time period | N/A |

---

Continued on next page

For peer review only

|                          |    |                                                                                                                                                                            |                                |
|--------------------------|----|----------------------------------------------------------------------------------------------------------------------------------------------------------------------------|--------------------------------|
| Other analyses           | 17 | Report other analyses done—eg analyses of subgroups and interactions, and sensitivity analyses                                                                             | 15-16, and Supplemental Tables |
| <b>Discussion</b>        |    |                                                                                                                                                                            |                                |
| Key results              | 18 | Summarise key results with reference to study objectives                                                                                                                   | 16                             |
| Limitations              | 19 | Discuss limitations of the study, taking into account sources of potential bias or imprecision. Discuss both direction and magnitude of any potential bias                 | 19-20                          |
| Interpretation           | 20 | Give a cautious overall interpretation of results considering objectives, limitations, multiplicity of analyses, results from similar studies, and other relevant evidence | 17-19                          |
| Generalisability         | 21 | Discuss the generalisability (external validity) of the study results                                                                                                      | 19-20                          |
| <b>Other information</b> |    |                                                                                                                                                                            |                                |
| Funding                  | 22 | Give the source of funding and the role of the funders for the present study and, if applicable, for the original study on which the present article is based              | 21                             |



# BMJ Open

## A cross-sectional mHealth-based investigation of the associations between physical exercise patterns and pain symptoms in individuals with endometriosis

|                                 |                                                                                                                                                                                                                                                                                                                                                                  |
|---------------------------------|------------------------------------------------------------------------------------------------------------------------------------------------------------------------------------------------------------------------------------------------------------------------------------------------------------------------------------------------------------------|
| Journal:                        | <i>BMJ Open</i>                                                                                                                                                                                                                                                                                                                                                  |
| Manuscript ID                   | bmjopen-2021-059280.R2                                                                                                                                                                                                                                                                                                                                           |
| Article Type:                   | Original research                                                                                                                                                                                                                                                                                                                                                |
| Date Submitted by the Author:   | 07-Jun-2022                                                                                                                                                                                                                                                                                                                                                      |
| Complete List of Authors:       | Ensari, Ipek; Columbia University, Data Science Institute<br>Lipsky-Gorman, Sharon; Columbia University, Department of Biomedical Informatics<br>Horan, Emma; Columbia University, Department of Biomedical Informatics<br>Bakken, Suzanne; Columbia University, School of Nursing<br>Elhadad, Noemie; Columbia University, Department of Biomedical Informatics |
| <b>Primary Subject Heading</b>: | Health informatics                                                                                                                                                                                                                                                                                                                                               |
| Secondary Subject Heading:      | Public health                                                                                                                                                                                                                                                                                                                                                    |
| Keywords:                       | PAIN MANAGEMENT, Health informatics < BIOTECHNOLOGY & BIOINFORMATICS, PREVENTIVE MEDICINE, EPIDEMIOLOGY, COMPLEMENTARY MEDICINE                                                                                                                                                                                                                                  |
|                                 |                                                                                                                                                                                                                                                                                                                                                                  |

SCHOLARONE™  
Manuscripts



I, the Submitting Author has the right to grant and does grant on behalf of all authors of the Work (as defined in the below author licence), an exclusive licence and/or a non-exclusive licence for contributions from authors who are: i) UK Crown employees; ii) where BMJ has agreed a CC-BY licence shall apply, and/or iii) in accordance with the terms applicable for US Federal Government officers or employees acting as part of their official duties; on a worldwide, perpetual, irrevocable, royalty-free basis to BMJ Publishing Group Ltd ("BMJ") its licensees and where the relevant Journal is co-owned by BMJ to the co-owners of the Journal, to publish the Work in this journal and any other BMJ products and to exploit all rights, as set out in our [licence](#).

The Submitting Author accepts and understands that any supply made under these terms is made by BMJ to the Submitting Author unless you are acting as an employee on behalf of your employer or a postgraduate student of an affiliated institution which is paying any applicable article publishing charge ("APC") for Open Access articles. Where the Submitting Author wishes to make the Work available on an Open Access basis (and intends to pay the relevant APC), the terms of reuse of such Open Access shall be governed by a Creative Commons licence – details of these licences and which [Creative Commons](#) licence will apply to this Work are set out in our licence referred to above.

Other than as permitted in any relevant BMJ Author's Self Archiving Policies, I confirm this Work has not been accepted for publication elsewhere, is not being considered for publication elsewhere and does not duplicate material already published. I confirm all authors consent to publication of this Work and authorise the granting of this licence.

1  
2  
3 A cross-sectional mHealth-based investigation of the associations between physical exercise  
4 patterns and pain symptoms in individuals with endometriosis  
5  
6

7 Running title: Daily exercise and pain patterns in endometriosis  
8  
9

10  
11  
12  
13  
14 Ipek Ensari<sup>1</sup>, PhD, Sharon Lipsky-Gorman<sup>2</sup>, MA, Emma Horan<sup>2</sup>, BS, Suzanne R. Bakken<sup>3</sup>, PhD,  
15  
16 FAAN, Noémie Elhadad<sup>2</sup>, PhD  
17

18  
19 <sup>1</sup>Data Science Institute, Columbia University, <sup>2</sup>Department of Biomedical Informatics, Columbia  
20  
21 University Irving Medical Center, <sup>3</sup>Columbia University School of Nursing, New York, NY  
22  
23

24  
25  
26  
27  
28  
29 **Author of Correspondence:**

30 Ipek Ensari  
31 Columbia University  
32 Data Science Institute  
33 475 Riverside Dr, Room 320,  
34 New York, NY 10115  
35 Email:ie2145@columbia.edu  
36  
37  
38  
39  
40  
41

42 **Word count:** 4,490  
43  
44  
45  
46  
47  
48  
49  
50  
51  
52  
53  
54  
55  
56  
57  
58  
59  
60

1  
2  
3  
4  
5  
6  
7  
8  
9  
10  
11  
12  
13  
14  
15  
16  
17  
18  
19  
20  
21  
22  
23  
24  
25  
26  
27  
28  
29  
30  
31  
32  
33  
34  
35  
36  
37  
38  
39  
40  
41  
42  
43  
44  
45  
46  
47  
48  
49  
50  
51  
52  
53  
54  
55  
56  
57  
58  
59  
60

**Abstract**

For peer review only

1  
2  
3 **Objectives:** This study investigates the association of daily physical exercise with pain  
4 symptoms in endometriosis. We also examined whether an individual's typical weekly (i.e.,  
5 habitual) exercise frequency influences (i.e., moderates) the relationship between their pain  
6 symptoms on a given day (day  $t$ ) and previous-day (day  $t-1$ ) exercise. **Participants:** The sample  
7 included 90,382 days of data from 1,009 participants (~85% non-Hispanic white) living with  
8 endometriosis across 38 countries. **Study Design:** This was an observational, retrospective study  
9 conducted using data from a research mobile app (Phendo) designed for collecting self-reported  
10 data on symptoms and self-management of endometriosis. **Primary Outcome Measures:** The  
11 two primary outcomes were the composite day-level pain score that includes pain intensity and  
12 location, and the change in this score from previous day ( $\Delta$ -score). We applied generalized linear  
13 mixed-level models to examine the effect of previous-day exercise and habitual exercise  
14 frequency on these outcomes. We included an interaction term between the 2 predictors to assess  
15 the moderation effect, and adjusted for previous-day pain, menstrual status, education level, and  
16 body mass index. **Results:** The association of previous-day (day  $t-1$ ) exercise to pain symptoms  
17 on day  $t$  was moderated by habitual exercise frequency, independent of covariates (Rate  
18 ratio=0.96, 95% CI=0.95, 0.98,  $p=0.0007$  for day-level pain score,  $B=-0.14$ , 95%CI=-0.26, -  
19 0.016,  $p=0.026$  for  $\Delta$ -score). Those who regularly engaged in exercise at least 3 times per week  
20 were more likely to experience favorable pain outcomes after having a bout of exercise on the  
21 previous day. **Conclusions:** Regular exercise might influence the day-level (i.e., short-term)  
22 association of pain symptoms to exercise. These findings can inform exercise recommendations  
23 for endometriosis pain management, especially for those who are at greater risk for lack of  
24 regular exercise due to acute exacerbations in their pain after exercise.  
25  
26  
27  
28  
29  
30  
31  
32  
33  
34  
35  
36  
37  
38  
39  
40  
41  
42  
43  
44  
45  
46  
47  
48  
49  
50  
51  
52  
53  
54  
55  
56  
57  
58  
59  
60

1  
2  
3  
4  
5  
6  
7  
8  
9  
10  
11  
12  
13  
14  
15  
16  
17  
18  
19  
20  
21  
22  
23  
24  
25  
26  
27  
28  
29  
30  
31  
32  
33  
34  
35  
36  
37  
38  
39  
40  
41  
42  
43  
44  
45  
46  
47  
48  
49  
50  
51  
52  
53  
54  
55  
56  
57  
58  
59  
60

For peer review only

### Strengths and limitations of this study

- This study leverages data from a research mobile app (Phendo) designed for collecting self-reported data on symptoms and self-management of endometriosis.
- Daily exercise and pain symptom patterns in endometriosis is investigated under ecologically-valid conditions.
- The participant sample (N=1,009) represents 38 countries, ages across the reproductive life span, and various person-level characteristics.
- The study is limited by self-reported data collection by somewhat consistent trackers and lacks details on duration or intensity of exercise to evaluate as potential moderators.
- Participants consisted of mostly white, non-Hispanic white individuals; therefore, results might not be generalizable to other demographic groups.

## INTRODUCTION

Exercise, a subset of physical activity (PA) that is planned, structured, repetitive, and intended to improve or maintain physical fitness, is an important component of effective pain management (i.e., reduction and prevention of pain symptoms).[1, 2] Both acute (i.e., single bout/session) and chronic (i.e., repeated bouts/sessions over time) exercise training have been demonstrated to improve numerous pain-related conditions. [1, 3-7] However, pain-related responses to exercise are variable in populations with chronic pain conditions.[8] Similarly, exacerbation of pain with exercise could pose a barrier to regular exercise in such individuals, thus increasing resistance to exercising, which in return can worsen pain, related disability, and risk for co-morbidities.[9-11] Investigation into the naturally-occurring pattern of pain symptoms associated with exercise behavior can help inform the design of exercise-based therapies for targeting disease-related pain symptoms.

Individuals with endometriosis may benefit from such investigations for several reasons.[12-14] Endometriosis is a systemic, estrogen-dependent inflammatory condition characterized primarily by chronic pelvic and abdominal pain, pain with sexual intercourse, and infertility.[15, 16] It significantly impacts daily function and quality of life (QoL)[17, 18], contributing to a productivity loss of 6.3 hours/week[19] and an estimated \$69.4 billion in excess health expenditures annually in the United States.[20] Existing medical and hormonal therapies have limited efficacy for pain management, often confounded by side effects.[21] Opioids and other analgesics are commonly prescribed for long-term use,[22, 23] despite treatment guidelines recommending use of nonpharmacologic therapies including PA.[24] Consequently, there is a critical need to identify alternative approaches for endometriosis pain management.



1  
2  
3 One such approach is exercise, based on various mechanisms proposed in the  
4 literature[25] that might pertain to endometriosis. These include regulation of the serotonergic  
5 and opioid receptors,[26] reduction of inflammatory markers associated with pain,[27, 28] and  
6 effect of exercise on nerve growth factor expression that is associated with the painful  
7 endometriosis lesions.[29, 30] Exercise can increase pain management self-efficacy, which is  
8 associated with improved pain outcomes and QoL, for individuals with chronic pain.[31] While  
9 the evidence on exercise for pain management is promising [4, 32, 33], existing data are scarce,  
10 cross-sectional, and indicate variable effects on pain outcomes.[33-37] Despite these limitations,  
11 previous reports of exercise-induced adaptations to pain stimuli through increased pain threshold  
12 suggest that the regularity with which an individual engages in exercise over the long term (i.e.,  
13 habitual exercise frequency) might influence (i.e., moderate) the relationship between their day-  
14 level exercise and pain symptoms.[38, 39] Among regular exercisers, pain-related activation has  
15 been demonstrated in the brain's descending antinociceptive pathway, with corresponding  
16 reductions in self-reported pain after acute bouts of at least moderate intensity exercise.[40]  
17 Moreover, studies report that habitual exercise frequency moderates a variety of self-reported  
18 outcomes (e.g., mood, anxiety, fatigue) in response to acute exercise.[41-43] While these  
19 findings are promising, their generalizability is limited by sample characteristics, laboratory-  
20 based experimental pain stimuli and exercise manipulations, and brief measurement duration of  
21 up to several hours. Thus, further investigation is needed to examine the relationship between  
22 pain symptoms and exercise behavior with a representative sample, under ecologically valid  
23 conditions, while accounting for possible between-individual variability and temporal lags in the  
24 outcome that extend beyond several hours.  
25  
26  
27  
28  
29  
30  
31  
32  
33  
34  
35  
36  
37  
38  
39  
40  
41  
42  
43  
44  
45  
46  
47  
48  
49  
50  
51  
52  
53  
54  
55  
56  
57  
58  
59  
60

1  
2  
3 Accordingly, this study examines the naturally-occurring daily patterns of pain symptoms  
4 and exercise behavior in endometriosis. We leverage mobile self-tracking, a particularly useful  
5 approach for capturing ecologically valid profiles of the dynamic temporal fluctuations and  
6 between-individual variability in pain over time.[44] We primarily aim to delineate the degree to  
7 which an individual's typical weekly exercise frequency (i.e., habitual exercise) influences (i.e.,  
8 moderates) the association of their pain symptoms on a given day (day  $t$ ) to their previous-day  
9 (day  $t-1$ ) exercise behavior (i.e., lagged-day effects). Given the previously documented variable  
10 course of pain symptomology in endometriosis,[45] we also delineate the variability in day-to-  
11 day pain experiences within these analyses.  
12  
13  
14  
15  
16  
17  
18  
19  
20  
21  
22  
23  
24  
25

## 26 MATERIALS AND METHODS

### 27 Study Design

28  
29 Study design and protocols were approved by the Columbia University Irving Medical  
30 Center (CUIMC) Institutional Review Board (#AAAQ9812). This study was conducted with  
31 retrospective data collected through the observational research mobile app "Phendo". Phendo  
32 was designed and developed for self-tracking endometriosis symptoms and its management. It is  
33 available for iOS<sup>1</sup> and Android<sup>2</sup> in App stores for free.  
34  
35  
36  
37  
38  
39  
40  
41

### 42 Study Sample and Inclusion Criteria

43  
44 The study sample comprised Phendo users with a self-reported surgery-, clinician-, or  
45 suspected diagnosis of endometriosis and self-tracked exercise and pain data between November  
46 2016 and April 2020. All participants, regardless of diagnosis type, are provided the same set of  
47 measures for completion in the App. In a previous study, the endometriosis phenotype (i.e.,  
48 characterization) obtained using Phendo data was consistent with both the characterization of the  
49  
50  
51  
52  
53  
54  
55  
56  
57  
58  
59  
60

1  
2  
3 disease in the literature based on standard clinical surveys and clinician (i.e., human expert)  
4 evaluations.[46] We decided a priori to include all participants who selected one of the three  
5 affirmative responses in the present analyses, excluding those who indicated that they did not  
6 have endometriosis. Out of the initial eligible pool of 9,792 Phendo users with reported  
7 endometriosis, 7,949 had at least one day of tracking of the variables of interest for the study. Of  
8 these, 1,009 users had sufficient amount of data on pain and exercise for analysis (See *Data*  
9 *Analysis*) and were included in the study.

### 19 **Recruitment and Informed Consent**

21 Study participants were passively recruited through one of the App stores, engagement on  
22 study social media sites, or word-of-mouth. Upon downloading Phendo, all potential users went  
23 through an informed consent and enrollment process before tracking any data. First, they were  
24 provided with an explanation of the App, its overall purpose and link to its website  
25 (citizenendo.org) which includes detailed information and instructional videos for using the App.  
26 Participants completed a brief “verify your understanding” quiz to ensure their comprehension of  
27 how their data might be used for research purposes, anonymity and confidentiality (See  
28 Supplementary Figures 1-2 for example screenshots). This was followed by formal electronic  
29 informed consent (and assent for individuals 13-18 years old), a copy of which was sent to the  
30 participant. Once enrolled, users were instructed to track daily, but they were free to track as  
31 much or as sporadically as they wished, and they did not receive any prompts or requests to track  
32 a specific variable from the research team. Findings from a previous study evaluating recruitment  
33 and retention patterns within Phendo and seven other similar self-tracking apps indicated that  
34 Phendo’s user engagement was similar to standard engagement patterns in research smartphone

1  
2  
3 apps.[47] Participants in the current study did not receive financial compensation for their  
4 tracking activities.  
5  
6

## 7 **Study Measures**

8  
9  
10 *Day-level Pain.* We assessed day-level pain through multiple items within Phendo: 1.  
11 “Are you in pain now? Where is the pain?”, 2. “Any gastrointestinal or urinary issues?” (painful  
12 urination (dysuria), painful bowel movement (dyschezia)). Phendo pain item response options  
13 include all areas of the body (20 available choices, as well as right/left and upper/middle/lower  
14 specification), and can be mapped onto a visual, analogous to the McGill Pain Scale.[48] Pain  
15 severity for each affirmative response was rated on a 3-point categorical scale (mild, moderate,  
16 or severe), analogous to other commonly used pain rating scales in the literature.[49, 50] This  
17 categorization has been used for standardization and comparisons across different pain measures,  
18 and demonstrated superior ability to capture the nonlinear relationship between reported pain  
19 severity and interference with activity than use of numbers.[51, 52]  
20  
21  
22  
23  
24  
25  
26  
27  
28  
29  
30  
31  
32

33 We computed a heuristic, composite day-level pain score to capture participants’  
34 conceptualization of their pain experience by summing the severity scores reported for each body  
35 area (e.g., moderate pain in abdomen, mild pains in chest and leg would yield  $2+1+1=4$  as the  
36 total score).[45] This allowed consideration of the multi-dimensional pain experience in a single  
37 outcome. To account for and circumvent any potential pain rumination/catastrophizing [53, 54]  
38 and varying tracking habits among participants, the score was computed based on the unique  
39 reports of area-severity pairs per day for each participant (e.g., if a participant tracked mild  
40 abdominal pain three times in a day, this abdomen-mild pair is counted toward the daily pain  
41 score only once). This score was the foundation of two study outcome variables: 1) total day-  
42 level pain score, and 2) difference in day-level pain score from previous day to the next (i.e.,  $t-(t-$   
43  
44  
45  
46  
47  
48  
49  
50  
51  
52  
53  
54  
55  
56  
57  
58  
59  
60

1  
2  
3 1)). The latter captures additional nuances in the data, enabling analyses to distinguish between  
4  
5 participants with overall high day-level pain scores over time and experience a post-exercise  
6  
7 reduction in pain versus those with low pain scores and who not experience a post-exercise  
8  
9 reduction in pain. In the current study sample, the composite pain scores were moderately  
10  
11 correlated with scores from other standard pain measures (e.g.,  $r=0.36$ ,  $p<0.0001$  with the Pelvic-  
12  
13 Abdominal Pain Visual Analog Scale (VAS);  $r=-0.46$ ,  $p<0.0001$  with Medical Outcomes Study  
14  
15 36-item Health Survey (SF-36) Bodily Pain subscale).  
16  
17

18  
19 *Day-level and habitual exercise.* Phendo allows tracking of daily exercise through  
20  
21 responding to a root question “Did you exercise today? (Yes/No)”. Upon selecting a “Yes”, users  
22  
23 can further customize their entry within this item by adding exercise details through unrestricted  
24  
25 free-text responses. We used responses to the root item to compute day-level and mean weekly  
26  
27 exercise frequency (i.e., habitual exercise) for each participant. We calculated the latter by  
28  
29 summing the number of exercise reports tracked per week across the range of days of data and  
30  
31 then dividing this number by the total number of weeks of data. We used free-text responses to  
32  
33 categorize exercises by modality and to validate that the entries were exercise-related. Any non-  
34  
35 exercise activity (e.g., sleep, meditate, sitting, socialize) was recoded as a no exercise in the  
36  
37 analytic data set. This day-level exercise assessment aims to increase ecological validity[55, 56]  
38  
39 and reduce the likelihood of low test-retest reliability and inaccuracy due to recall bias.[57] We  
40  
41 evaluated the validity of the scores from the Phendo exercise item through a series of analyses  
42  
43 with the study sample.[58] Results supported its concurrency with other self-reported recall-  
44  
45 based measures (i.e., Kendall’s  $\tau=0.256$ ,  $p<0.001$  with Exercise Vital Sign[59] and  $\tau=0.294$ ,  
46  
47  $p=0.001$  with accelerometers;  $B=18.73$ ,  $p=0.039$  in association to the Nurses’ Health Study II  
48  
49 Weekly Exercise Scale[60] scores).  
50  
51  
52  
53  
54  
55  
56  
57  
58  
59  
60

1  
2  
3           *Standard Pain and Exercise Measures.* To allow comparisons of the study sample with  
4 others in the literature, we report sample summary scores from the following components of the  
5 World Endometriosis Research Foundation (WERF) Endometriosis Patient Questionnaire (EPQ-  
6 S)[61, 62]: 1) The 2-item Bodily Pain subscale of the SF-36,[63] 2) Pelvic-abdominal Pain VAS  
7 (“Please rate how severe your general pelvic/lower abdominal pain was at its worst in the last 3  
8 months using the pain scale below where 0=no pain and 10=worst imaginable pain.”), and 3)  
9  
10 The 8-item Nurses’ Health Study II Weekly Physical Activity Scale (NHS-II) [60]. It measures  
11 self-reported weekly durations of major exercise modalities (i.e., walking, running, lap  
12 swimming, jogging, bicycling, tennis, calisthenics, other aerobic recreation) in a typical week in  
13 the past 12 months. These durations can further be multiplied by their metabolic equivalents  
14 (METs) based on the Compendium of PA [64] and summed to obtain the total weekly exercise-  
15 related energy expenditure (EE). We report both the total weekly minutes and EE for the sample.  
16  
17  
18  
19  
20  
21  
22  
23  
24  
25  
26  
27  
28  
29

### 30 **Patient and Public Involvement**

31  
32  
33           We developed Phendo measures using patient-centered participatory design, through  
34 qualitative (focus groups, interviews) and quantitative research (surveys, coded content analysis)  
35 with participants with endometriosis, described in detail elsewhere.[65, 66] This technique for  
36 developing patient-reported outcome measures has been suggested to enhance content validity  
37 and relevance of the measure to the target population, thus providing a more comprehensive and  
38 accurate representation of the disease under study.[55, 67-69]  
39  
40  
41  
42  
43  
44  
45  
46

### 47 **Data Analysis**

48  
49           *Sample Characteristics.* We characterized the study sample through frequencies (%) and  
50 means (standard deviation; SD) of demographics, self-reported pain medication use, and scores  
51 on the standard pain and exercise measures for those who completed the surveys. We  
52  
53  
54  
55  
56  
57  
58  
59  
60

1  
2  
3 characterized pain symptomology in the sample by describing the prevalence of self-tracked pain  
4 severities by each body area.  
5  
6

7  
8 *Associations of pain symptoms with exercise behavior.* Using generalized linear mixed  
9 models (GLMMs), we separately estimated day-level total pain score and pain score difference  
10 as primary outcomes. Both outcomes were regressed on previous-day (day  $t-1$ ) exercise and  
11 mean weekly exercise frequency to estimate the slope of mean pain level on day  $t$  and change in  
12 pain. We included an interaction term between the 2 predictors to assess the moderation of the  
13 day-level association by each individual's mean weekly exercise frequency. We included  
14 participant as a random effect to account for between-person variability in daily pain by  
15 estimating a separate intercept for each participant. Models were further adjusted for menstrual  
16 status (binary: yes/no), previous-day (i.e., day  $t-1$ ) pain, body mass index (BMI) and education  
17 level. Race/ethnicity and age were not significantly associated with average daily pain reports  
18 (F=1.68, p=0.14 for race/ethnicity;  $r=-0.148$ , p=0.07 for age), and age was further significantly  
19 associated with education level (Kruskal-Wallis  $X^2=64.948$ , p<0.0001). To avoid redundancy  
20 and multicollinearity, race/ethnicity and age were not included as model covariates.  
21  
22  
23  
24  
25  
26  
27  
28  
29  
30  
31  
32  
33  
34  
35  
36

37  
38 *Model Specification.* We specified a zero-inflated negative binomial (ZINB) distribution  
39 when modeling the total pain outcome, as it has been demonstrated to provide the best fit for  
40 outcomes with over-dispersion and zero-inflation (i.e., zeros due to both sampling and  
41 missingness) [70-72]. Missing values in the BMI (22%), education level (19%) and menstrual  
42 status (22%) were imputed as described in Supplementary File 1 and checked for appropriateness  
43 based on convergence and marginal distributions following guidelines [73-75] (See  
44 Supplementary Figures 3-5). Adequacy of imputations for valid statistical inference were  
45 verified based on the recommended measures of missing data information of *fraction of missing*  
46  
47  
48  
49  
50  
51  
52  
53  
54  
55  
56  
57  
58  
59  
60

1  
2  
3 *information* ( $\lambda$ ) and *relative increase in variance due to nonresponse* ( $r$ )[76, 77] (See  
4  
5 Supplementary Table 1). Further details of the model specification are in Supplementary file 1.  
6  
7 We included participants who had at least 11 pairs of consecutive days of data in the final  
8  
9 analytic sample as this provided sufficient amount of data to 1) ensure model convergence and  
10  
11 improve reliability and accuracy of the estimates, particularly the random effects and their  
12  
13 variances[78-81], and 2) adequately infer participants' habitual exercise level by considering at  
14  
15 least three weeks' worth of tracking to compute the weekly exercise frequency. Finally, as a  
16  
17 post-hoc analysis, we tested the possible influence of type of endometriosis diagnosis by  
18  
19 including this categorical variable in the 2 models described above. We conducted the data  
20  
21 analyses using R[82] and the glmmTMB package for the GLMMs.[71, 72] Statistical  
22  
23 significance level was set at  $p < 0.05$  for all analyses.  
24  
25  
26  
27  
28  
29  
30

## 31 RESULTS

32  
33 *Sample Characteristics.* Sample characteristics are provided in Table 1. Participants  
34  
35 (N=1,009) had on average 89.6 days of data available for analysis (SD=62.8, Range=22-841,  
36  
37 IQR=31). Participants collectively represented 38 countries, with a wide age range (14-63 years),  
38  
39 and varying education and employment status. Almost 70% (N=702) had laparoscopic  
40  
41 confirmation of their diagnosis, 19.8% (N=200) had a clinician diagnosis, and 10.6% (N=107)  
42  
43 had suspected endometriosis (i.e., "I think I have endometriosis (know the symptoms, no  
44  
45 doctor)"). Scores from the VAS, SF-36, and NHS-II Scales are provided in Table 2. The overall  
46  
47 prevalence of non-prescription pain medication use, opioid-based medication use, opioid-  
48  
49 paracetamol/acetaminophen combination medication use were 49.35%, 11.19%, and 11.39%,  
50  
51 respectively (See Table 1).  
52  
53  
54  
55  
56  
57  
58  
59  
60



1  
2  
3 *Pain symptom patterns.* Mean daily pain score was 4.48 (SD=7.11, 0-79). Mean person-  
4 level daily pain score (i.e., “mean of means”) was 4.82 (SD=4.57, Range=0-34). Moderate  
5 intensity was the most frequently reported severity across all body areas (Mean=49.3%,  
6 SD=22.2), and pelvic pain was the most prevalent area, followed by back pain and  
7 gastrointestinal pain (See Figure 1).  
8  
9

10  
11  
12  
13  
14  
15 *Habitual exercise patterns.* Mean weekly exercise frequency was 1.43/week (SD=1.54,  
16 Range=0-6.87/week, IQR=2.21). The exercise frequencies were at least 3 times per week 21.3%  
17 (N=215); 1-2 times per week, 40.2% (N=406); and no regular exercise, 38.5% (388). Prevalence  
18 of the 10 most frequently reported exercise modalities in the sample are depicted in Figure 2.  
19 Walking was the most common modality, reported by 50.94% of the participants, followed by  
20 yoga (30.82%), and muscle strength/endurance training activities (24.38%). Yoga and stretching  
21 exercises were collectively reported by almost 45% of the sample.  
22  
23  
24  
25  
26  
27  
28  
29

30  
31 *Association of day-level pain to exercise.* Tables 3 and 4 display results of the GLMMs  
32 estimating day-level total pain score and difference. Coefficients for the model interaction terms  
33 indicated a small but statistically significant moderation of previous-day exercise by habitual  
34 exercise frequency (RR=0.96 for total pain score and -0.14 for pain score difference,  $p<0.05$ ; See  
35 Figure 3). Further inspection of this interaction indicated a mean typical exercise frequency of ~3  
36 times/week as the point after which previous-day exercise began to be associated with favorable  
37 pain outcomes (e.g., a decrease from the predicted mean score) on the following day, adjusted  
38 for other day-level and person-level factors (Figure 3). On the other hand, those who exercised  
39 less frequently or none were more likely to report higher levels of pain and larger increases (or  
40 smaller decreases) in pain 1 day after an exercise bout compared to not having exercised the day  
41 before.  
42  
43  
44  
45  
46  
47  
48  
49  
50  
51  
52  
53  
54  
55  
56  
57  
58  
59  
60



1  
2  
3 endometriosis and to identify habitual weekly exercise frequency as a moderator of this  
4  
5 relationship.  
6

7  
8 *Moderation effects.* Previous-day exercise was associated with more favorable pain  
9  
10 outcomes for participants who engaged in regular exercise at least 3 times per week in our  
11  
12 sample. That is, these participants were more likely to report lower pain score and smaller  
13  
14 increases (or larger decreases) in pain the day after an exercise bout, compared to not having  
15  
16 exercised the previous day. In contrast, those who engaged in regular exercise less than twice a  
17  
18 week were more likely to experience pain symptoms on days after having engaged in exercise.  
19  
20 This is in line with the physical activity guidelines [85, 86], which recommend aerobic exercise  
21  
22 at least 3 times per week and muscle-strengthening exercise at least twice per week.[87]  
23  
24 However, there are no specific recommendations for endometriosis in the current guidelines; and  
25  
26 systematic reviews recommend “overall, general exercise” without further details due to lack  
27  
28 adequate research on the optimal dose of exercise for endometriosis pain.[4, 36] Our findings  
29  
30 provide preliminary evidence for informing exercise recommendations for endometriosis pain  
31  
32 management (i.e., prevention or reduction), specifically for targeting those who are at greater  
33  
34 risk for insufficient regular exercise due to acute exacerbations in their pain after exercise. This  
35  
36 moderation effect suggests that an individual might need to develop a regular, sustained exercise  
37  
38 behavior (i.e., habit) to start experiencing the favorable pain outcomes associated with acute  
39  
40 bouts of exercise. Nevertheless, future experimental studies are warranted for a comprehensive  
41  
42 investigation of this question.  
43  
44  
45  
46  
47  
48

49 *Patterns of pain symptoms.* Our findings of moderate pain in pelvis as the most  
50  
51 frequently reported pain are in line with those from others on endometriosis[88] and various  
52  
53 chronic pain conditions.[89, 90] The distribution of the total daily pain scores was right-skewed  
54  
55  
56  
57  
58  
59  
60

1  
2  
3 (i.e., extreme scores on the higher ends of the range) with a mean score that was on the lower end  
4  
5 of the range. This could partly be due to the data collection method which includes not just days  
6  
7 where the participant experienced pain but also days without pain. Indeed, our participants on  
8  
9 average did not report or experience any pain 6.25% of the time. In contrast, traditional study  
10  
11 designs typically rely on recall of past pain experience aggregated over a period of time (e.g.,  
12  
13 past week, month) and ask the participant to report their average or highest pain severity over  
14  
15 this period.[91, 92] Such recall-based techniques are prone to peak-and-end effects,[93] and  
16  
17 catastrophizing or other similar biases.[92, 94] Recruitment from clinical referral points is a  
18  
19 common practice and this has been attributed to higher normative scores in the literature,[91] as  
20  
21 opposed to more even distributions of pain symptomology among community-based  
22  
23 samples.[95] Self-tracking facilitates documentation of not only severe pain, but also mild,  
24  
25 moderate, and no pain instances, therefore enabling a more realistic representation of the pain  
26  
27 experience as it dynamically unfolds over time. This can reduce the likelihood of over-  
28  
29 representing severe cases, which is a potential limitation attributed to data collected at point of  
30  
31 contact in clinical settings.[17] However, it is difficult to make direct comparisons with other  
32  
33 studies given the different pain measures, warranting further research.

34  
35  
36  
37  
38  
39  
40 *Patterns of exercise behavior.* The mean weekly exercise frequency in the study sample  
41  
42 was 1.43/week (SD=1.57, IQR=2.29), with only 24.5 % (N=202) engaging in exercise at least  
43  
44 three times a week. This suggests that individuals with endometriosis might be at increased risk  
45  
46 for physical inactivity[85, 87], which is a risk factor for various comorbidities [96] and further  
47  
48 linked to exacerbation of chronic pain.[97, 98] These collectively underscore the need to focus  
49  
50 efforts on promoting regular exercise in women with endometriosis. Notably, yoga and  
51  
52 stretching were reported collectively by almost half of the sample within Phendo. This could  
53  
54  
55  
56  
57  
58  
59  
60

1  
2  
3 indicate that participants use these approaches for pain relief, in line with a previous study  
4 reporting efficacy of hatha yoga.[33] Nevertheless, participants overall tracked a wide range of  
5 exercise modalities across the intensity spectrum (e.g., yoga vs running/cycling) as helpful for  
6 their symptoms, suggesting between-individual variability in responses to a given exercise type  
7 or intensity. This can be targeted through individualized exercise prescriptions,[25, 99] providing  
8 precedence for undertaking a precision approach for pain self-management in endometriosis.  
9  
10 Various individualization approaches (e.g., adaptive treatment strategies,[100] micro-randomized  
11 trials,[101] just-in-time adaptive interventions [102]) have been investigated for intervening on  
12 health behaviors, including PA.[5, 101] It would be opportune to implement a similar N-of-1  
13 intervention approach for identifying person-specific optimal “dose” of exercise based on its  
14 parameters to target endometriosis pain symptoms.  
15  
16

17  
18  
19  
20  
21  
22  
23  
24  
25  
26  
27  
28 *Consideration of person-level factors.* Another novel finding in our study was the similar  
29 point estimates for the effect of exercise on pain outcomes between those with clinician/surgical-  
30 versus suspected diagnosis of endometriosis. Endometriosis is difficult to diagnose, with a 7.6-  
31 year delay between symptom onset and its surgical diagnosis.[20, 103, 104] Endometriosis  
32 patients further face insurance-related challenges in accessing healthcare for their condition.[15,  
33 105] The participants without a formal diagnosis might have sought medical care for their  
34 symptoms but not received the needed care (e.g., diagnostic testing, referral to a specialist),  
35 received false negative diagnostic tests results,[103] or lacked adequate access to healthcare.  
36  
37 This finding underscores the need for further research in endometriosis that considers self-report  
38 of endometriosis symptoms, instead of limiting to patients with a physician referral or relying on  
39 secondary data sources (e.g., electronic health records).  
40  
41  
42  
43  
44  
45  
46  
47  
48  
49  
50  
51  
52  
53  
54  
55  
56  
57  
58  
59  
60

1  
2  
3 *Novel methodological contributions.* In contrast to other existing questionnaires in the  
4 literature, the self-tracking items in Phendo measure momentary and daily pain symptoms and  
5 exercise—a time interval for which there are no standard validated, commonly used measures  
6 designed for frequent sampling. Phendo’s pain tracking items are similar in design to other pain  
7 measures,[48, 66] and have been indicated to be reflective of pain documentation in clinical  
8 records.[45] While mHealth studies have examined the validity, utility and specificity for various  
9 pain conditions [52, 106, 107] of their pain measurement approaches, a standard “all-in-one”  
10 single outcome that captures the multi-dimensional pain experience across different populations  
11 remains to be established.[53, 108] Computation of a composite pain has been proposed by  
12 others[109] as this circumvents numerous limitations in current pain assessment approaches,  
13 including lack of a standard single outcome that can be used universally,[108] or a validated  
14 instrument that captures all the constructs of persistent pain.[110] There is furthermore a lack of  
15 endometriosis-specific pain measures for repeated assessments, thus the heuristic composite pain  
16 measure allowed consideration of two dimensions of pain simultaneously in our analyses. The  
17 pain scores in the current study sample were moderately correlated with those from the pelvic-  
18 abdominal VAS and the SF-36 bodily pain measure, which were also similarly correlated with  
19 each other ( $r=0.46$ ,  $p<0.0001$ ). Nevertheless, future directions include evaluation of this measure  
20 in larger samples for its reliability and validity via a nomological network-based analysis.

21  
22  
23  
24  
25  
26  
27  
28  
29  
30  
31  
32  
33  
34  
35  
36  
37  
38  
39  
40  
41  
42  
43  
44 *Limitations.* We acknowledge several limitations of this study, including reliance on self-  
45 reports for the type of endometriosis diagnosis and exercise behavior. First, we used a binary  
46 measure of exercise in our analyses and did not have sufficient details on duration or intensity for  
47 inclusion in the analyses as potential moderators. Of note, similar mHealth measures of daily PA  
48 and exercise have been used by others [111-113] who reported concordance with accelerometer-  
49  
50  
51  
52  
53  
54  
55  
56  
57  
58  
59  
60

1  
2  
3 based measures,[114] and higher correlations than self-report methods with accelerometer  
4  
5 measures.[111, 112] While we provide preliminary evidence toward the validity of Phendo's  
6  
7 exercise tracking item both as a day-level and habitual measure[58], future studies are needed to  
8  
9 evaluate it in larger samples and compare against research-grade accelerometers. Similarly, we  
10  
11 did not have granular daily data on pain medication use, as such it was not investigated as a  
12  
13 potential covariate in the analyses. In addition to medications, future studies could consider other  
14  
15 pain management approaches for comparison to exercise, given previous research suggesting  
16  
17 endometriosis patients report using a variety of symptom management techniques.[45] Next, our  
18  
19 sample consisted primarily of White, non-Hispanic women who are relatively consistent  
20  
21 mHealth technology users and furthermore can understand English to use the App. Therefore, the  
22  
23 results might differ among other groups including non-English speakers or those without an  
24  
25 interest in mHealth use for self-management or monitoring.  
26  
27  
28  
29  
30  
31  
32

### 33 **Conclusion**

34  
35 In this study, we provide evidence that habitual exercise frequency is a potential  
36  
37 moderator of the association between pain symptoms and previous-day exercise in  
38  
39 endometriosis, indicating that those who regularly exercise at least ~3 times per week are less  
40  
41 likely to report pain symptoms after having exercised on the previous day. Individuals with  
42  
43 endometriosis are significantly more likely to have higher all-cause healthcare utilization and  
44  
45 direct health care costs than those without endometriosis, including twice the prevalence of  
46  
47 opioid prescriptions for pain management [23] and prolonged duration of prescriptions.[22]  
48  
49 While guidelines recommend prescribing exercise for management of pain in clinical  
50  
51 populations, endometriosis (or general chronic) pain-specific recommendations to guide patients  
52  
53  
54  
55  
56  
57  
58  
59  
60

1  
2  
3 and providers on measurable parameters (time, type, intensity, and frequency) are lacking. Future  
4  
5 studies are warranted investigating the effects of both acute and chronic exercise on  
6  
7 endometriosis pain with a focus on various types, intensities and durations.  
8  
9

### 12 **Author Contributions**

14 IE conceptualized the study, conducted the data analyses, and prepared the first draft of the  
15 manuscript. SLG and ENH were responsible for data acquisition, curation and management. NE  
16  
17 acquired the funding and provided the mHealth infrastructure for the study (Phendo App). NE  
18  
19 and SB provided guidance on the study design and data analyses. SB, NE, SLG and ENH  
20  
21 critically reviewed and provided feedback on the manuscript.  
22  
23  
24  
25  
26  
27

### 28 **Funding**

30 Funding for the work is provided by a postdoctoral fellowship from the Data Science Institute at  
31  
32 Columbia University and an award from the National Library of Medicine (R01 LM013043). We  
33  
34 are grateful to the Phendo participants.  
35  
36  
37  
38  
39

### 40 **Competing Interests**

41 All authors report no conflicts of interest.  
42  
43  
44  
45  
46

### 47 **Data availability statement**

48 Data are available on reasonable request.  
49  
50  
51  
52  
53

54 1. Available at <https://itunes.apple.com/us/app/phendo/id1145512423>

55 2. Available at <https://play.google.com/store/apps/details?id=com.appliedinformaticsinc.phendo>



## References

1. Ambrose KR, Golightly YM. Physical exercise as non-pharmacological treatment of chronic pain: Why and when. *Best Pract Res Clin Rheumatol*. 2015;29(1):120-30. Epub 2015/05/23. doi: 10.1016/j.berh.2015.04.022. PubMed PMID: 26267006.
2. Rice D, Nijs J, Kosek E, Wideman T, Hasenbring MI, Koltyn K, et al. Exercise-Induced Hypoalgesia in Pain-Free and Chronic Pain Populations: State of the Art and Future Directions. *The Journal of Pain*. 2019;20(11):1249-66. doi: <https://doi.org/10.1016/j.jpain.2019.03.005>.
3. Lemmens J, De Pauw J, Van Soom T, Michiels S, Versijpt J, van Breda E, et al. The effect of aerobic exercise on the number of migraine days, duration and pain intensity in migraine: a systematic literature review and meta-analysis. *J Headache Pain*. 2019;20(1):16. Epub 2019/02/16. doi: 10.1186/s10194-019-0961-8. PubMed PMID: 30764753; PubMed Central PMCID: PMC6734345.
4. Armour M, Ee CC, Naidoo D, Ayati Z, Chalmers KJ, Steel KA, et al. Exercise for dysmenorrhoea. *Cochrane Database of Systematic Reviews*. 2019;(9). doi: 10.1002/14651858.CD004142.pub4. PubMed PMID: CD004142.
5. Rabbi M, Aung MS, Gay G, Reid MC, Choudhury T. Feasibility and acceptability of mobile phone-based auto-personalized physical activity recommendations for chronic pain self-management: pilot study on adults. *Journal of medical Internet research*. 2018;20(10):e10147.
6. Sevel L, Boissoneault J, Alappattu M, Bishop M, Robinson M. Training endogenous pain modulation: a preliminary investigation of neural adaptation following repeated exposure to clinically-relevant pain. *Brain Imaging and Behavior*. 2020;14(3):881-96. doi: 10.1007/s11682-018-0033-8.
7. Gordon R, Bloxham S, editors. A systematic review of the effects of exercise and physical activity on non-specific chronic low back pain. *Healthcare*; 2016: Multidisciplinary Digital Publishing Institute.
8. Geneen LJ, Moore RA, Clarke C, Martin D, Colvin LA, Smith BH. Physical activity and exercise for chronic pain in adults: an overview of Cochrane Reviews. *Cochrane Database of Systematic Reviews*. 2017;(4).
9. Zhang R, Chomistek AK, Dimitrakoff JD, Giovannucci EL, Willett WC, Rosner BA, et al. Physical activity and chronic prostatitis/chronic pelvic pain syndrome. *Med Sci Sports Exerc*. 2015;47(4):757-64. doi: 10.1249/MSS.0000000000000472. PubMed PMID: 25116086.
10. Pinto A, Di Raimondo D, Tuttolomondo A, Buttà C, Milio G, Licata G. Effects of physical exercise on inflammatory markers of atherosclerosis. *Current pharmaceutical design*. 2012;18(28):4326-49.

11. Garatachea N, Molinero O, Martínez-García R, Jimenez-Jimenez R, Gonzalez-Gallego J, Marquez S. Feelings of well being in elderly people: relationship to physical activity and physical function. *Archives of Gerontology and Geriatrics*. 2009;48(3):306-12.
12. Tennfjord MK, Gabrielsen R, Tellum T. Effect of physical activity and exercise on endometriosis-associated symptoms: a systematic review. *BMC Women's Health*. 2021;21(1):355. doi: 10.1186/s12905-021-01500-4.
13. Evans S, Fernandez S, Olive L, Payne LA, Mikocka-Walus A. Psychological and mind-body interventions for endometriosis: A systematic review. *J Psychosom Res*. 2019;124:109756. Epub 2019/08/25. doi: 10.1016/j.jpsychores.2019.109756. PubMed PMID: 31443810.
14. Mira TAA, Buen MM, Borges MG, Yela DA, Benetti-Pinto CL. Systematic review and meta-analysis of complementary treatments for women with symptomatic endometriosis. *Int J Gynaecol Obstet*. 2018;143(1):2-9. Epub 2018/06/27. doi: 10.1002/ijgo.12576. PubMed PMID: 29944729.
15. Fourquet J, Gao X, Zavala D, Orengo JC, Abac S, Ruiz A, et al. Patients' report on how endometriosis affects health, work, and daily life. *Fertility and sterility*. 2010;93(7):2424-8. doi: 10.1016/j.fertnstert.2009.09.017. PubMed PMID: 19926084.
16. Schliep KC, Mumford SL, Peterson CM, Chen Z, Johnstone EB, Sharp HT, et al. Pain typology and incident endometriosis. *Hum Reprod*. 2015;30(10):2427-38. Epub 2015/08/11. doi: 10.1093/humrep/dev147. PubMed PMID: 26269529.
17. De Graaff A, D'hooghe T, Dunselman G, Dirksen C, Hummelshoj L, Consortium WE, et al. The significant effect of endometriosis on physical, mental and social wellbeing: results from an international cross-sectional survey. *Human reproduction*. 2013;28(10):2677-85.
18. Simoens S, Dunselman G, Dirksen C, Hummelshoj L, Bokor A, Brandes I, et al. The burden of endometriosis: costs and quality of life of women with endometriosis and treated in referral centres. *Human Reproduction*. 2012;27(5):1292-9.
19. Soliman AM, Coyne KS, Gries KS, Castelli-Haley J, Snabes MC, Surrey ES. The effect of endometriosis symptoms on absenteeism and presenteeism in the workplace and at home. *Journal of managed care & specialty pharmacy*. 2017;23(7):745-54.
20. Simoens S, Dunselman G, Dirksen C, Hummelshoj L, Bokor A, Brandes I, et al. The burden of endometriosis: costs and quality of life of women with endometriosis and treated in referral centres. *Hum Reprod*. 2012;27(5):1292-9. Epub 2012/03/17. doi: 10.1093/humrep/des073. PubMed PMID: 22422778.
21. The Practice Committee of the American Society for Reproductive Medicine. Treatment of pelvic pain associated with endometriosis: a committee opinion. 2014 2014/04/01/. Report No.: 0015-0282 Contract No.: 4.

- 1  
2  
3 22. Lamvu G, Soliman AM, Manthena SR, Gordon K, Knight J, Taylor HS. Patterns of  
4 prescription opioid use in women with endometriosis: evaluating prolonged use, daily dose, and  
5 concomitant use with benzodiazepines. *Obstetrics and gynecology*. 2019;133(6):1120.  
6  
7
- 8 23. Soliman AM, Surrey ES, Bonafede M, Nelson JK, Vora JB, Agarwal SK. Health care  
9 utilization and costs associated with endometriosis among women with medicaid insurance.  
10 *Journal of managed care & specialty pharmacy*. 2019;25(5):566-72.  
11
- 12 24. Dowell D, Haegerich TM, Chou R. CDC guideline for prescribing opioids for chronic  
13 pain—United States, 2016. *Jama*. 2016;315(15):1624-45.  
14
- 15 25. Sluka KA, Frey-Law L, Hoeger Bement M. Exercise-induced pain and analgesia?  
16 Underlying mechanisms and clinical translation. *Pain*. 2018;159 Suppl 1(Suppl 1):S91-S7. doi:  
17 10.1097/j.pain.0000000000001235. PubMed PMID: 30113953.  
18
- 19 26. Tour J, Löfgren M, Mannerkorpi K, Gerdle B, Larsson A, Palstam A, et al. Gene-to-gene  
20 interactions regulate endogenous pain modulation in fibromyalgia patients and healthy controls-  
21 antagonistic effects between opioid and serotonin-related genes. *Pain*. 2017;158(7):1194-203.  
22 Epub 2017/03/11. doi: 10.1097/j.pain.0000000000000896. PubMed PMID: 28282362; PubMed  
23 Central PMCID: PMC5472004.  
24  
25
- 26 27. Bobinski F, Teixeira JM, Sluka KA, Santos ARS. Interleukin-4 mediates the analgesia  
27 produced by low-intensity exercise in mice with neuropathic pain. *Pain*. 2018;159(3):437-50.  
28 Epub 2017/11/16. doi: 10.1097/j.pain.0000000000001109. PubMed PMID: 29140923; PubMed  
29 Central PMCID: PMC5812806.  
30  
31
- 32 28. Montenegro ML, Bonoche CM, Meola J, Portella RL, Ribeiro-Silva A, Brunaldi MO, et  
33 al. Effect of Physical Exercise on Endometriosis Experimentally Induced in Rats. *Reproductive*  
34 *sciences (Thousand Oaks, Calif)*. 2018:1933719118799205. Epub 2018/09/21. doi:  
35 10.1177/1933719118799205. PubMed PMID: 30231769.  
36  
37
- 38 29. Stratton P, Berkley KJ. Chronic pelvic pain and endometriosis: translational evidence of  
39 the relationship and implications. *Human reproduction update*. 2011;17(3):327-46. Epub  
40 2010/11/23. doi: 10.1093/humupd/dmq050. PubMed PMID: 21106492.  
41
- 42 30. Park S-J, Yong M-S, Na S-S. Effect of exercise on the expression of nerve growth factor  
43 in the spinal cord of rats with induced osteoarthritis. *Journal of physical therapy science*.  
44 2015;27(8):2551-4. Epub 2015/08/21. doi: 10.1589/jpts.27.2551. PubMed PMID: 26357438.  
45
- 46 31. Karasawa Y, Yamada K, Iseki M, Yamaguchi M, Murakami Y, Tamagawa T, et al.  
47 Association between change in self-efficacy and reduction in disability among patients with  
48 chronic pain. *PLOS ONE*. 2019;14(4):e0215404. doi: 10.1371/journal.pone.0215404.  
49  
50
- 51 32. Armour M, Sinclair J, Chalmers KJ, Smith CA. Self-management strategies amongst  
52 Australian women with endometriosis: a national online survey. *BMC Complementary and*  
53 *Alternative Medicine*. 2019;19(1):17. doi: 10.1186/s12906-019-2431-x.  
54  
55  
56  
57  
58  
59

- 1  
2  
3 33. Gonçalves AV, Barros NF, Bahamondes L. The Practice of Hatha Yoga for the  
4 Treatment of Pain Associated with Endometriosis. *Journal of Alternative & Complementary*  
5 *Medicine*. 2017;23(1):45-52. doi: 10.1089/acm.2015.0343. PubMed PMID: 120746246.  
6  
7  
8 34. Ricci E, Viganò P, Cipriani S, Chiaffarino F, Bianchi S, Rebonato G, et al. Physical  
9 activity and endometriosis risk in women with infertility or pain: Systematic review and meta-  
10 analysis. *Medicine*. 2016;95(40):e4957-e. doi: 10.1097/MD.0000000000004957. PubMed  
11 PMID: 27749551.  
12  
13 35. Carpenter SE, Tjaden B, Rock JA, Kimball A. The effect of regular exercise on women  
14 receiving danazol for treatment of endometriosis. *International journal of gynaecology and*  
15 *obstetrics: the official organ of the International Federation of Gynaecology and Obstetrics*.  
16 1995;49(3):299-304. Epub 1995/06/01. PubMed PMID: 9764869.  
17  
18 36. Bonoche CM, Montenegro ML, Rosa ESJC, Ferriani RA, Meola J. Endometriosis and  
19 physical exercises: a systematic review. *Reprod Biol Endocrinol*. 2014;12:4. Epub 2014/01/08.  
20 doi: 10.1186/1477-7827-12-4. PubMed PMID: 24393293; PubMed Central PMCID:  
21 PMC3895811.  
22  
23 37. Naugle KM, Fillingim RB, Riley JL, 3rd. A meta-analytic review of the hypoalgesic  
24 effects of exercise. *The journal of pain : official journal of the American Pain Society*.  
25 2012;13(12):1139-50. Epub 2012/11/08. doi: 10.1016/j.jpain.2012.09.006. PubMed PMID:  
26 23141188.  
27  
28 38. Janal MN, Colt EWD, Clark WC, Glusman M. Pain sensitivity, mood and plasma  
29 endocrine levels in man following long-distance running: Effects of naloxone. *Pain*.  
30 1984;19(1):13-25. doi: [https://doi.org/10.1016/0304-3959\(84\)90061-7](https://doi.org/10.1016/0304-3959(84)90061-7).  
31  
32 39. Droste C, Greenlee MW, Schreck M, Roskamm H. Experimental pain thresholds and  
33 plasma beta-endorphin levels during exercise. *Medicine & Science in Sports & Exercise*.  
34 1991;23(3):334-42. doi: 10.1249/00005768-199103000-00012.  
35  
36 40. Scheef L, Jankowski J, Daamen M, Weyer G, Klingenberg M, Renner J, et al. An fMRI  
37 study on the acute effects of exercise on pain processing in trained athletes. *PAIN*. 2012;153(8).  
38  
39 41. Hoffman MD, Hoffman DR. Exercisers Achieve Greater Acute Exercise-Induced Mood  
40 Enhancement Than Nonexercisers. *Archives of Physical Medicine and Rehabilitation*.  
41 2008;89(2):358-63. doi: 10.1016/j.apmr.2007.09.026.  
42  
43 42. Hallgren M, Moss ND, Gastin P. Regular exercise participation mediates the affective  
44 response to acute bouts of vigorous exercise. *J Sports Sci Med*. 2010;9(4):629-37. Epub  
45 2010/01/01. PubMed PMID: 24149790; PubMed Central PMCID: PMC3761821.  
46  
47 43. Chen Y-C, Chen C, Martínez RM, Etnier JL, Cheng Y. Habitual physical activity  
48 mediates the acute exercise-induced modulation of anxiety-related amygdala functional  
49 connectivity. *Scientific Reports*. 2019;9(1):19787. doi: 10.1038/s41598-019-56226-z.  
50  
51  
52  
53  
54  
55  
56  
57  
58  
59  
60

- 1  
2  
3 44. May M, Junghaenel DU, Ono M, Stone AA, Schneider S. Ecological Momentary  
4 Assessment Methodology in Chronic Pain Research: A Systematic Review. *J Pain*.  
5 2018;19(7):699-716. Epub 2018/01/31. doi: 10.1016/j.jpain.2018.01.006. PubMed PMID:  
6 29371113.  
7
- 8  
9 45. Ensari I, Pichon A, Lipsky-Gorman S, Bakken S, Elhadad N. Augmenting the Clinical  
10 Data Sources for Enigmatic Diseases: A Cross-Sectional Study of Self-Tracking Data and  
11 Clinical Documentation in Endometriosis. *Applied Clinical Informatics*. 2020;11(05):769-84.  
12
- 13 46. Urteaga I, McKillop M, Elhadad N. Learning endometriosis phenotypes from patient-  
14 generated data. *npj Digital Medicine*. 2020;3(1):88. doi: 10.1038/s41746-020-0292-9.  
15
- 16 47. Pratap A, Neto EC, Snyder P, Stepnowsky C, Elhadad N, Grant D, et al. Indicators of  
17 retention in remote digital health studies: a cross-study evaluation of 100,000 participants. *npj*  
18 *Digital Medicine*. 2020;3(1):21. doi: 10.1038/s41746-020-0224-8.  
19
- 20  
21 48. Melzack R. The McGill Pain Questionnaire: Major properties and scoring methods.  
22 *PAIN*. 1975;1(3).  
23
- 24 49. Jones KR, Vojir CP, Hutt E, Fink R. Determining mild, moderate, and severe pain  
25 equivalency across pain-intensity tools in nursing home residents. *J Rehabil Res Dev*.  
26 2007;44(2):305-14. Epub 2007/06/07. doi: 10.1682/jrrd.2006.05.0051. PubMed PMID:  
27 17551881.  
28
- 29  
30 50. Bestel E, Gotteland J-P, Donnez J, Taylor RN, Garner EI. Linzagolix for Endometriosis-  
31 Associated Pain: Lipid Changes After 52 Weeks of Treatment [25B]. *Obstetrics & Gynecology*.  
32 2020;135:25S. doi: 10.1097/01.AOG.0000663180.46470.c9. PubMed PMID: 00006250-  
33 202005001-00082.  
34
- 35 51. Serlin RC, Mendoza TR, Nakamura Y, Edwards KR, Cleeland CS. When is cancer pain  
36 mild, moderate or severe? Grading pain severity by its interference with function. *Pain*.  
37 1995;61(2):277-84. Epub 1995/05/01. doi: 10.1016/0304-3959(94)00178-h. PubMed PMID:  
38 7659438.  
39
- 40  
41 52. Adams P, Murnane EL, Elfenbein M, Wethington E, Gay G. Supporting the Self-  
42 Management of Chronic Pain Conditions with Tailored Momentary Self-Assessments. *Proc*  
43 *SIGCHI Conf Hum Factor Comput Syst*. 2017;2017:1065-77. doi: 10.1145/3025453.3025832.  
44 PubMed PMID: 30310887.  
45
- 46 53. Boonstra AM, Stewart RE, Köke AJA, Oosterwijk RFA, Swaan JL, Schreurs KMG, et al.  
47 Cut-Off Points for Mild, Moderate, and Severe Pain on the Numeric Rating Scale for Pain in  
48 Patients with Chronic Musculoskeletal Pain: Variability and Influence of Sex and  
49 Catastrophizing. *Front Psychol*. 2016;7:1466-. doi: 10.3389/fpsyg.2016.01466. PubMed PMID:  
50 27746750.  
51
- 52  
53 54. Dirks JF, Wunder J, Kinsman R, McElhinny J, Jones NF. A Pain Rating Scale and a Pain  
54 Behavior Checklist for Clinical Use: Development, Norms, and the Consistency Score.  
55 *Psychotherapy and Psychosomatics*. 1993;59(1):41-9.  
56  
57  
58  
59

- 1  
2  
3 55. Frost MH, Reeve BB, Liepa AM, Stauffer JW, Hays RD. What is sufficient evidence for  
4 the reliability and validity of patient-reported outcome measures? *Value Health*. 2007;10 Suppl  
5 2:S94-s105. Epub 2007/11/13. doi: 10.1111/j.1524-4733.2007.00272.x. PubMed PMID:  
6 17995479.  
7
- 8  
9 56. Faurholt-Jepsen M, Munkholm K, Frost M, Bardram JE, Kessing LV. Electronic self-  
10 monitoring of mood using IT platforms in adult patients with bipolar disorder: A systematic  
11 review of the validity and evidence. *BMC Psychiatry*. 2016;16(1):7. doi: 10.1186/s12888-016-  
12 0713-0.  
13
- 14 57. Charter RA. Sample size requirements for precise estimates of reliability,  
15 generalizability, and validity coefficients. *J Clin Exp Neuropsychol*. 1999;21(4):559-66. Epub  
16 1999/11/07. doi: 10.1076/jcen.21.4.559.889. PubMed PMID: 10550813.  
17
- 18  
19 58. Ensari I, Horan E, Elhadad N, Bakken S. Evaluation of a disease-specific mHealth-based  
20 exercise self-tracking measure. *MedRXiv*. 2022. doi:  
21 <https://doi.org/10.1101/2022.05.16.22275170>.  
22
- 23 59. Kuntz JL, Young DR, Saelens BE, Frank LD, Meenan RT, Dickerson JF, et al. Validity  
24 of the Exercise Vital Sign Tool to Assess Physical Activity. *Am J Prev Med*. 2021;60(6):866-72.  
25 Epub 2021/03/31. doi: 10.1016/j.amepre.2021.01.012. PubMed PMID: 33781618; PubMed  
26 Central PMCID: PMCPMC8154650.  
27
- 28  
29 60. Wolf AM, Hunter DJ, Colditz GA, Manson JE, Stampfer MJ, Corsano KA, et al.  
30 Reproducibility and validity of a self-administered physical activity questionnaire. *Int J*  
31 *Epidemiol*. 1994;23(5):991-9. Epub 1994/10/01. doi: 10.1093/ije/23.5.991. PubMed PMID:  
32 7860180.  
33
- 34 61. Vitonis AF, Vincent K, Rahmioglu N, Fassbender A, Buck Louis GM, Hummelshoj L, et  
35 al. World Endometriosis Research Foundation Endometriosis Phenome and Biobanking  
36 Harmonization Project: II. Clinical and covariate phenotype data collection in endometriosis  
37 research. *Fertility and sterility*. 2014;102(5):1223-32. Epub 2014/09/22. doi:  
38 10.1016/j.fertnstert.2014.07.1244. PubMed PMID: 25256930.  
39  
40
- 41 62. Jones G, Kennedy S, Barnard A, Wong J, Jenkinson C. Development of an endometriosis  
42 quality-of-life instrument: The Endometriosis Health Profile-30. *Obstet Gynecol*.  
43 2001;98(2):258-64. Epub 2001/08/17. doi: 10.1016/s0029-7844(01)01433-8. PubMed PMID:  
44 11506842.  
45  
46
- 47 63. McHorney CA, Ware JE, Lu JFR, Sherbourne CD. The MOS 36-Item Short-Form Health  
48 Survey (SF-36): III. Tests of Data Quality, Scaling Assumptions, and Reliability across Diverse  
49 Patient Groups. *Medical Care*. 1994;32(1):40-66.  
50
- 51 64. Ainsworth BE, Haskell WL, Herrmann SD, Meckes N, Bassett DR, Tudor-Locke C, et al.  
52 2011 Compendium of Physical Activities: a second update of codes and MET values. *Med Sci*  
53 *Sports Exerc*. 2011;43(8):1575-81.  
54  
55  
56  
57  
58  
59  
60

- 1  
2  
3 65. McKillop M, Voigt N, Schnall R, Elhadad N. Exploring self-tracking as a participatory  
4 research activity among women with endometriosis. *Journal of Participatory Medicine*. 2016.  
5  
6 66. McKillop M, Mamykina L, Elhadad N, editors. *Designing in the Dark: Eliciting Self-*  
7 *tracking Dimensions for Understanding Enigmatic Disease*. Proceedings of the 2018 CHI  
8 Conference on Human Factors in Computing Systems; 2018: ACM.  
9  
10 67. Anthoine E, Moret L, Regnault A, Sébille V, Hardouin J-B. Sample size used to validate  
11 a scale: a review of publications on newly-developed patient reported outcomes measures.  
12 *Health Qual Life Outcomes*. 2014;12:176-. doi: 10.1186/s12955-014-0176-2. PubMed PMID:  
13 25492701.  
14  
15 68. US Department of Health Human Services. *Guidance for industry-Patient-reported*  
16 *outcome measures: Use in medical product development to support labeling claims*. 2009.  
17  
18 69. Lomas J, Pickard L, Mohide A. Patient versus clinician item generation for quality-of-life  
19 measures: the case of language-disabled adults. *Medical Care*. 1987:764-9.  
20  
21 70. Hu M-C, Pavlicova M, Nunes EV. Zero-inflated and hurdle models of count data with  
22 extra zeros: examples from an HIV-risk reduction intervention trial. *Am J Drug Alcohol Abuse*.  
23 2011;37(5):367-75. doi: 10.3109/00952990.2011.597280. PubMed PMID: 21854279.  
24  
25 71. Brooks ME, Kristensen K, van Benthem KJ, Magnusson A, Berg CW, Nielsen A, et al.  
26 glmmTMB balances speed and flexibility among packages for zero-inflated generalized linear  
27 mixed modeling. *The R journal*. 2017;9(2):378-400.  
28  
29 72. Brooks ME, Kristensen K, van Benthem KJ, Magnusson A, Berg CW, Nielsen A, et al.  
30 Modeling zero-inflated count data with glmmTMB. *bioRxiv*. 2017:132753. doi: 10.1101/132753.  
31  
32 73. van Buuren S, Groothuis-Oudshoorn K. mice: Multivariate Imputation by Chained  
33 Equations in R. *Journal of Statistical Software*; Vol 1, Issue 3 (2011). 2011.  
34  
35 74. Van Buuren S. *Flexible imputation of missing data*: CRC press; 2018.  
36  
37 75. Bondarenko I, Raghunathan T. Graphical and numerical diagnostic tools to assess  
38 suitability of multiple imputations and imputation models. *Statistics in Medicine*.  
39 2016;35(17):3007-20. doi: <https://doi.org/10.1002/sim.6926>.  
40  
41 76. Rubin DB. The Calculation of Posterior Distributions by Data Augmentation: Comment:  
42 A Noniterative Sampling/Importance Resampling Alternative to the Data Augmentation  
43 Algorithm for Creating a Few Imputations When Fractions of Missing Information Are Modest:  
44 The SIR Algorithm. *Journal of the American Statistical Association*. 1987;82(398):543-6. doi:  
45 10.2307/2289460.  
46  
47 77. Rubin DB. *Multiple imputation for nonresponse in surveys*: John Wiley & Sons; 2004.  
48  
49 78. Schunck R. Cluster Size and Aggregated Level 2 Variables in Multilevel Models. A  
50 Cautionary Note. 2016. 2016;10(1). Epub 2016-07-20. doi: 10.12758/mda.2016.005.  
51  
52  
53  
54  
55  
56  
57  
58  
59  
60

- 1  
2  
3 79. Bell B, Ferron J, Kromrey J, editors. Cluster Size in Multilevel Models: The Impact of  
4 Sparse Data Structures on Point and Interval Estimates in Two-Level Models 2008.  
5  
6 80. Austin PC, Leckie G. The effect of number of clusters and cluster size on statistical  
7 power and Type I error rates when testing random effects variance components in multilevel  
8 linear and logistic regression models. *Journal of Statistical Computation and Simulation*.  
9 2018;88(16):3151-63. doi: 10.1080/00949655.2018.1504945.  
10  
11  
12 81. Snijders TAB. Power and sample size in multilevel modeling. In: Everitt B, Howell D,  
13 editors. *Encyclopedia of Statistics in Behavioral Science*. 3: Wiley; 2006. p. 1570–3.  
14  
15 82. Core Team R. R: A language and environment for statistical computing. R Foundation  
16 for Statistical Computing; Vienna, Austria 1997.  
17  
18 83. Scheipl F, Greven S, Küchenhoff H. Size and power of tests for a zero random effect  
19 variance or polynomial regression in additive and linear mixed models. *Computational statistics  
20 & data analysis*. 2008;52(7):3283-99.  
21  
22  
23 84. Crainiceanu CM, Ruppert D. Likelihood ratio tests in linear mixed models with one  
24 variance component. *Journal of the Royal Statistical Society: Series B (Statistical Methodology)*.  
25 2004;66(1):165-85.  
26  
27 85. US Department of Health Human Services Physical activity guidelines advisory  
28 committee scientific report. 2018.  
29  
30  
31 86. Bull FC, Al-Ansari SS, Biddle S, Borodulin K, Buman MP, Cardon G, et al. World  
32 Health Organization 2020 guidelines on physical activity and sedentary behaviour. *Br J Sports  
33 Med*. 2020;54(24):1451-62. doi: 10.1136/bjsports-2020-102955. PubMed PMID: 33239350;  
34 PubMed Central PMCID: PMC7719906.  
35  
36 87. Piercy KL, Troiano RP, Ballard RM, Carlson SA, Fulton JE, Galuska DA, et al. The  
37 physical activity guidelines for Americans. *Jama*. 2018;320(19):2020-8.  
38  
39 88. Warzecha D, Szymusik I, Wielgos M, Pietrzak B. The Impact of Endometriosis on the  
40 Quality of Life and the Incidence of Depression-A Cohort Study. *Int J Environ Res Public  
41 Health*. 2020;17(10). Epub 2020/05/28. doi: 10.3390/ijerph17103641. PubMed PMID:  
42 32455821; PubMed Central PMCID: PMC7277332.  
43  
44 89. Becker N, Thomsen AB, Olsen AK, Sjogren P, Bech P, Eriksen J. Pain epidemiology and  
45 health related quality of life in chronic non-malignant pain patients referred to a Danish  
46 multidisciplinary pain center. *Pain*. 1997;73(3):393-400. doi: 10.1016/s0304-3959(97)00126-7.  
47 PubMed PMID: WOS:000071429200014.  
48  
49 90. Bouhassira D, Lantéri-Minet M, Attal N, Laurent B, Touboul C. Prevalence of chronic  
50 pain with neuropathic characteristics in the general population. *Pain*. 2008;136(3):380-7.  
51  
52  
53  
54  
55  
56  
57  
58  
59  
60



- 1  
2  
3 91. Nicholas MK, Asghari A, Blyth FM. What do the numbers mean? Normative data in  
4 chronic pain measures. *Pain*. 2008;134(1):158-73. doi:  
5 <https://doi.org/10.1016/j.pain.2007.04.007>.  
6  
7 92. Dansie EJ, Turk DC. Assessment of patients with chronic pain. *Br J Anaesth*.  
8 2013;111(1):19-25. doi: 10.1093/bja/aet124. PubMed PMID: 23794641.  
9  
10 93. Schneider S, Stone AA, Schwartz JE, Broderick JE. Peak and end effects in patients'  
11 daily recall of pain and fatigue: a within-subjects analysis. *J Pain*. 2011;12(2):228-35. doi:  
12 10.1016/j.jpain.2010.07.001. PubMed PMID: 20817615.  
13  
14 94. De Boer M, Struys M, Versteegen G. Pain-related catastrophizing in pain patients and  
15 people with pain in the general population. *European journal of pain*. 2012;16(7):1044-52.  
16  
17 95. Ehde DM, Gibbons LE, Chwastiak L, Bombardier CH, Sullivan MD, Kraft GH. Chronic  
18 pain in a large community sample of persons with multiple sclerosis. *Multiple Sclerosis Journal*.  
19 2003;9(6):605-11. doi: 10.1191/1352458503ms939oa.  
20  
21 96. Katzmarzyk PT, Powell KE, Jakicic JM, Troiano RP, Piercy K, Tennant B, et al.  
22 Sedentary Behavior and Health: Update from the 2018 Physical Activity Guidelines Advisory  
23 Committee. *Med Sci Sports Exerc*. 2019;51(6):1227-41. doi: 10.1249/MSS.0000000000001935.  
24 PubMed PMID: 31095080.  
25  
26 97. Basen-Engquist K, Scruggs S, Jhingran A, Bodurka DC, Lu K, Ramondetta L, et al.  
27 Physical activity and obesity in endometrial cancer survivors: associations with pain, fatigue, and  
28 physical functioning. *Am J Obstet Gynecol*. 2009;200(3):288.e1-.e2888. Epub 2008/12/25. doi:  
29 10.1016/j.ajog.2008.10.010. PubMed PMID: 19110220.  
30  
31 98. Dansie EJ, Turk DC, Martin KR, Van Domelen DR, Patel KV. Association of Chronic  
32 Widespread Pain With Objectively Measured Physical Activity in Adults: Findings From the  
33 National Health and Nutrition Examination Survey. *The Journal of Pain*. 2014;15(5):507-15. doi:  
34 <https://doi.org/10.1016/j.jpain.2014.01.489>.  
35  
36 99. Polaski AM, Phelps AL, Kostek MC, Szucs KA, Kolber BJ. Exercise-induced  
37 hypoalgesia: A meta-analysis of exercise dosing for the treatment of chronic pain. *PloS one*.  
38 2019;14(1):e0210418-e. doi: 10.1371/journal.pone.0210418. PubMed PMID: 30625201.  
39  
40 100. Almirall D, Compton SN, Gunlicks-Stoessel M, Duan N, Murphy SA. Designing a pilot  
41 sequential multiple assignment randomized trial for developing an adaptive treatment strategy.  
42 *Statistics in medicine*. 2012;31(17):1887-902. Epub 2012/03/23. doi: 10.1002/sim.4512. PubMed  
43 PMID: 22438190; PubMed Central PMCID: PMC3399974.  
44  
45 101. Klasnja P, Smith S, Seewald NJ, Lee A, Hall K, Luers B, et al. Efficacy of Contextually  
46 Tailored Suggestions for Physical Activity: A Micro-randomized Optimization Trial of  
47 HeartSteps. *Annals of behavioral medicine : a publication of the Society of Behavioral Medicine*.  
48 2018. Epub 2018/09/08. doi: 10.1093/abm/kay067. PubMed PMID: 30192907.  
49  
50  
51  
52  
53  
54  
55  
56  
57  
58  
59

- 1  
2  
3 102. Nahum-Shani I, Smith SN, Spring BJ, Collins LM, Witkiewitz K, Tewari A, et al. Just-  
4 in-Time Adaptive Interventions (JITAs) in Mobile Health: Key Components and Design  
5 Principles for Ongoing Health Behavior Support. *Annals of behavioral medicine : a publication*  
6 *of the Society of Behavioral Medicine*. 2018;52(6):446-62. Epub 2016/09/25. doi:  
7 10.1007/s12160-016-9830-8. PubMed PMID: 27663578; PubMed Central PMCID:  
8 PMCPMC5364076.  
9
- 10  
11 103. Falcone T, Mascha E. The elusive diagnostic test for endometriosis. *Fertility and sterility*.  
12 2003;80(4):886-8.  
13
- 14 104. Marian S, Hermanowicz-Szamatowicz K. Endometriosis—a decade later—still an  
15 enigmatic disease. What is the new in the diagnosis and treatment? *Gynecological*  
16 *Endocrinology*. 2020;36(2):104-8.  
17
- 18 105. Fourquet J, Zavala DE, Missmer S, Bracero N, Romaguera J, Flores I. Disparities in  
19 healthcare services in women with endometriosis with public vs private health insurance.  
20 *American Journal of Obstetrics & Gynecology*. 2019;221(6):623.e1-.e11. doi:  
21 10.1016/j.ajog.2019.06.020.  
22  
23
- 24 106. Lee RR, Rashid A, Ghio D, Thomson W, Cordingley L. "Seeing Pain Differently": A  
25 Qualitative Investigation Into the Differences and Similarities of Pain and Rheumatology  
26 Specialists' Interpretation of Multidimensional Mobile Health Pain Data From Children and  
27 Young People With Juvenile Idiopathic Arthritis. *JMIR Mhealth Uhealth*. 2019;7(7):e12952.  
28 Epub 2019/07/04. doi: 10.2196/12952. PubMed PMID: 31267979; PubMed Central PMCID:  
29 PMCPMC6632104.  
30  
31
- 32 107. Jamison RN, Raymond SA, Levine JG, Slawsby EA, Nedeljkovic SS, Katz NP.  
33 Electronic diaries for monitoring chronic pain: 1-year validation study. *Pain*. 2001;91(3):277-85.  
34  
35
- 36 108. Bouhassira D, Attal N. All in one: Is it possible to assess all dimensions of any pain with  
37 a simple questionnaire? *PAIN*. 2009;144(1).  
38
- 39 109. Pilitsis JG, Fahey M, Custozzo A, Chakravarthy K, Capobianco R. Composite score is a  
40 better reflection of patient response to chronic pain therapy compared with pain intensity alone.  
41 *Neuromodulation: Technology at the Neural Interface*. 2021;24(1):68-75.  
42
- 43 110. Grimmer-Somers K, Vipond N, Kumar S, Hall G. A review and critique of assessment  
44 instruments for patients with persistent pain. *Journal of pain research*. 2009;2:21.  
45  
46
- 47 111. Knell G, Gabriel KP, Businelle MS, Shuval K, Wetter DW, Kendzor DE. Ecological  
48 Momentary Assessment of Physical Activity: Validation Study. *J Med Internet Res*.  
49 2017;19(7):e253. doi: 10.2196/jmir.7602.  
50
- 51 112. Swendeman D, Comulada WS, Koussa M, Worthman CM, Estrin D, Rotheram-Borus  
52 MJ, et al. Longitudinal Validity and Reliability of Brief Smartphone Self-Monitoring of Diet,  
53 Stress, and Physical Activity in a Diverse Sample of Mothers. *JMIR Mhealth Uhealth*.  
54 2018;6(9):e176. Epub 2018/09/27. doi: 10.2196/mhealth.9378. PubMed PMID: 30249576;  
55 PubMed Central PMCID: PMCPMC6231816.  
56  
57  
58  
59  
60

1  
2  
3 113. Katapally TR, Chu LM. Digital epidemiological and citizen science methodology to  
4 capture prospective physical activity in free-living conditions: a SMART Platform study. BMJ  
5 Open. 2020;10(6):e036787. Epub 2020/07/01. doi: 10.1136/bmjopen-2020-036787. PubMed  
6 PMID: 32595163; PubMed Central PMCID: PMC7322321.  
7

8  
9 114. Zink J, Belcher BR, Dzibur E, Ke W, O'Connor S, Huh J, et al. Association Between  
10 Self-Reported and Objective Activity Levels by Demographic Factors: Ecological Momentary  
11 Assessment Study in Children. JMIR Mhealth Uhealth. 2018;6(6):e150. doi:  
12 10.2196/mhealth.9592.  
13  
14  
15  
16  
17  
18  
19  
20  
21  
22  
23  
24  
25  
26  
27  
28  
29  
30  
31  
32  
33  
34  
35  
36  
37  
38  
39  
40  
41  
42  
43  
44  
45  
46  
47  
48  
49  
50  
51  
52  
53  
54  
55  
56  
57  
58  
59  
60

Table 1. Study Sample Characteristics.

| Characteristic (N)                     | Mean (SD) / Frequency (%)                                  |
|----------------------------------------|------------------------------------------------------------|
| Age (827)                              | 31.0 (7.26), Median=30.6 (MAD=7.41),<br>Range= 14.3-62.9   |
| BMI (787)                              | 25.9 (6.98), Median=24.1 (MAD=4.74),<br>Range= 16.01-72.24 |
| <u>Type of endometriosis diagnosis</u> |                                                            |
| Surgery (702)                          | 69.57 %                                                    |
| Clinician (200)                        | 19.82 %                                                    |
| Self-diagnosis (107)                   | 10.60 %                                                    |
| <u>Work Environment</u>                |                                                            |
| Home (218)                             | 26.42 %                                                    |
| Outside (570)                          | 69.09 %                                                    |
| Unknown (221)                          | 21.29 %                                                    |
| <u>Living environment</u>              |                                                            |
| Rural (129)                            | 15.27 %                                                    |
| Suburban (340)                         | 41.21 %                                                    |
| Urban (363)                            | 44.00 %                                                    |
| Unknown (161)                          | 19.5 %                                                     |
| <u>Relationship status</u>             |                                                            |
| Married/domestic partnership (442)     | 53.57 %                                                    |
| Separated/divorced (28)                | 3.39 %                                                     |
| Single/never married (310)             | 37.57 %                                                    |



1  
2  
3  
4  
5  
6  
7  
8  
9  
10  
11  
12  
13  
14  
15  
16  
17  
18  
19  
20  
21  
22  
23  
24  
25  
26  
27  
28  
29  
30  
31  
32  
33  
34  
35  
36  
37  
38  
39  
40  
41  
42  
43  
44  
45  
46  
47  
48  
49  
50  
51  
52  
53  
54  
55  
56  
57  
58  
59  
60

|                  |         |
|------------------|---------|
| Australia (59)   | 5.84 %  |
| Germany (38)     | 3.76 %  |
| New Zealand (34) | 3.36 %  |
| Other (69)       | 6.83 %  |
| Unknown (207)    | 20.51 % |

For peer review only

Table 2. Sample Study Scores on Standard Measures of Pain and Exercise.

| <u>EPQ-S Measures (N)</u>                  | <u>Mean (SD)</u> |
|--------------------------------------------|------------------|
| SF-36 Bodily Pain (375)                    | 35.47 (22.33)    |
| Pelvic-abdominal pain VAS (316)            | 7.37 (1.97)      |
| NHS-II PA Scale Total Weekly Minutes (359) | 175.2 (280.2)    |
| NHS-II PA Scale Total Weekly EE (359)      | 16.13 (30.37)    |

For peer review only

Table 3. Results of the regression model estimating day-level total pain score (N=1,009).

| <b>Conditional Random Effects</b>                         |  | <b>Variance (95% CI)</b>   |                      |                |
|-----------------------------------------------------------|--|----------------------------|----------------------|----------------|
| Participant                                               |  | 1.09 (0.98, 1.21)          |                      |                |
| <b>Conditional Fixed Effects</b>                          |  | <b>Rate Ratio (95% CI)</b> | <b>Log Odds (SE)</b> | <b>z-score</b> |
| Intercept                                                 |  | 4.26*** (3.26, 5.56)       | 1.45*** (0.13)       | 10.82          |
| Menstrual Status                                          |  | 1.29*** (1.25, 1.32)       | 0.25*** (0.01)       | 20.31          |
| Previous Day Pain                                         |  | 1.02*** (1.02, 1.03)       | 0.02*** (0.00)       | 29.69          |
| Body Mass Index                                           |  | 1.01* (1.00, 1.02)         | 0.01 (0.00)          | 2.02           |
| Mean Weekly Exercise Frequency                            |  | 0.93* (0.89, 0.97)         | -0.06** (0.02)       | -2.96          |
| Previous Day exercise                                     |  | 1.10* (1.05, 1.15)         | 0.09** (0.15)        | 3.88           |
| Some College Education Level                              |  | 0.87 (0.83, 1.56)          | 0.13 (0.15)          | 0.86           |
| College or Higher Education Level                         |  | 0.93 (0.66, 1.16)          | -0.13 (0.14)         | -0.92          |
| Mean Weekly Exercise Frequency *<br>Previous Day exercise |  | 0.96** (0.95, 0.98)        | -0.03** (0.01)       | -3.37          |
| <b>Zero Inflation Terms</b>                               |  | <b>Rate Ratio (95% CI)</b> | <b>Log Odds (SE)</b> | <b>z-score</b> |
| Intercept                                                 |  | 0.17 (0.16, 0.18)          | -1.73*** (0.02)      | -62.96         |
| Same Day Exercise                                         |  | 5.34 (5.01, 5.68)          | 1.67*** (0.03)       | 52.53          |

95% CI=95% Confidence Interval. \* $p < 0.05$  \*\*  $p < 0.001$ , \*\*\* $p < 0.0001$ . Previous day pain and BMI were sample mean-centered. BMI and education level were kept as covariates in the model based on their significant associations with mean day-level pain scores (Pearson's  $r = 0.15$  for BMI and Kruskal-Wallis  $\chi^2 = 18.061$  for education level,  $p < 0.001$ ).



Table 4. Results of the regression model estimating pain score difference (N=1,009).

| <b>Conditional Random Effects</b> |  | <b>Variance (95% CI)</b>  |               |                |
|-----------------------------------|--|---------------------------|---------------|----------------|
| Participant (Intercept)           |  | 9.16 (8.28, 10.13)        |               |                |
| Residual                          |  | 26.83                     |               |                |
| <b>Conditional Fixed Effects</b>  |  | <b>B coefficient (SE)</b> | <b>95% CI</b> | <b>z-score</b> |
| Intercept                         |  | 2.70*** (0.51)            | 1.68, 3.72    | 5.29           |
| Menstrual Status                  |  | 1.47*** (0.09)            | 1.28, 1.66    | 15.43          |
| Previous Day Pain                 |  | -0.86*** (0.01)           | -0.87, -0.85  | -143.43        |
| Body Mass Index                   |  | 0.05* (0.01)              | 0.01, 0.10    | 2.86           |
| Mean Weekly Exercise Frequency    |  | -0.27** (0.08)            | -0.44, -0.10  | -3.12          |
| Previous Day Exercise             |  | 0.92** (0.18)             | 0.56, 1.27    | 5.08           |
| Some College Education Level      |  | -0.84 (0.62)              | -2.11, 0.42   | -1.35          |
| College or Higher Education Level |  | -2.07** (0.52)            | -3.10, -1.03  | -3.96          |
| Mean Weekly Exercise Frequency *  |  | -0.14* (0.06)             | -0.26, -0.01  | -2.22          |
| Previous Day Exercise             |  |                           |               |                |
| <b>Zero Inflation Terms</b>       |  | <b>B coefficient</b>      | <b>95% CI</b> | <b>z-score</b> |
| Intercept                         |  | -0.91*** (0.01)           | -0.93, -0.88  | -63.84         |
| Same Day Exercise                 |  | 0.70*** (0.02)            | 0.66, 0.75    | 32.09          |

SE= Standard Error. \* $p < 0.05$  \*\*  $p < 0.001$ , \*\*\* $p < 0.0001$ . Previous day pain and BMI were sample mean-centered. BMI and education level were kept as covariates in the model based on their significant associations with mean day-level pain scores (Pearson's  $r = 0.15$  for BMI and Kruskal-Wallis  $\chi^2 = 18.061$  for education level,  $p < 0.001$ ).

1  
2  
3 Figure 1. Prevalence of pain severity by location reported among participants (i.e., unique counts  
4 of body area-severity per participant). Moderate intensity was the most frequently tracked across  
5 all body areas (14.1%-85.4%).  
6

7  
8 Figure 2. Prevalence of self-reported exercise modalities in the study sample. “Other  
9 cardiovascular” category includes activities such as dancing, aerobics and using the elliptical  
10 machine. “Muscle strength and endurance” category includes activities such as weight lifting and  
11 calisthenics. “Other exercise” category includes sports activities such as skiing and soccer, multi-  
12 modal exercises (e.g., high intensity interval training of both cardiovascular and muscular  
13 endurance), or those that did not fit into the other categories (e.g., stabilizing or balancing  
14 exercises, Wii fit or other home-based fitness activities).  
15

16  
17 Panel Figure 3. Moderation of effect of previous-day exercise by habitual exercise levels (X  
18 axes). Y axes represent predicted day-level total scores (top) and differences (bottom) in pain.  
19 Shaded areas depict 95% confidence intervals. At approximately 3 times/week of regular  
20 exercise, previous day exercise starts to be associated with more favorable pain outcomes on the  
21 following day (i.e., decrease from the model predicted mean scores), adjusted for other day-level  
22 and person level factors.  
23

24  
25 Figure 4. Plot of the random effect of the participant on total day pain scores estimated from the  
26 multilevel model (N=1,009). Y-axis represents the range of estimated average pain scores for  
27 each participant. Each black dot represents one participant’s mean (i.e., random intercept), grey  
28 lines indicate 95% confidence intervals. Distribution of points across the x-axis indicate large  
29 variability across individuals (i.e., between-group variance), and the grey lines indicate the  
30 within-person variability in daily scores over time.  
31  
32  
33  
34  
35  
36  
37  
38  
39  
40  
41  
42  
43  
44  
45  
46  
47  
48  
49  
50  
51  
52  
53  
54  
55  
56  
57  
58  
59  
60



776x493mm (72 x 72 DPI)

1  
2  
3  
4  
5  
6  
7  
8  
9  
10  
11  
12  
13  
14  
15  
16  
17  
18  
19  
20  
21  
22  
23  
24  
25  
26  
27  
28  
29  
30  
31  
32  
33  
34  
35  
36  
37  
38  
39  
40  
41  
42  
43  
44  
45  
46  
47  
48  
49  
50  
51  
52  
53  
54  
55  
56  
57  
58  
59  
60



1411x705mm (72 x 72 DPI)



694x750mm (72 x 72 DPI)

1  
2  
3  
4  
5  
6  
7  
8  
9  
10  
11  
12  
13  
14  
15  
16  
17  
18  
19  
20  
21  
22  
23  
24  
25  
26  
27  
28  
29  
30  
31  
32  
33  
34  
35  
36  
37  
38  
39  
40  
41  
42  
43  
44  
45  
46  
47  
48  
49  
50  
51  
52  
53  
54  
55  
56  
57  
58  
59  
60



571x339mm (72 x 72 DPI)

### Supplementary File 1. Missing Data Imputations.

Phendo is an observational research app and participants do not receive prompts from the research team to track any given item at a certain time. They are free to track (or not track) any given item as they wish. Consequently, missingness in the data occurs due to a variety of possible reasons that are not always known or easy to distinguish. For example, a period not tracked for a day could mean that the participant did not have a period, or they chose not to track, or did not use the app at all that day. To circumvent this issue, we took several measures. First, we limited data to days for which the participant tracked their pain, exercise and menstrual status at least once, as a proxy for app use. Next, we assigned a score of zero for pain on days where the participant had tracked exercise or menstrual status but not pain. This approach is motivated by 2 reasons. First, the nature of the pain question in Phendo (i.e., “Where is the pain?”, “How severe is the pain?”) assumes the participants to track when they feel pain and therefore a “No Pain” response is neither available in the app nor would make sense. Second, multiple imputation methods impute such that the resulting imputations are limited to the observed values and distributions. Thus by default it would omit the possibility of a zero in the resultant pain score distribution, which increases risk of overestimation of the scores in the sample.

BMI (calculated from participant reported height and weight) and education level were missing for 22% and 19% of the participants, respectively, and menstrual status was missing (i.e., not tracked) 22% of the time in the dataset. We imputed these 3 variables using multivariate imputations by chained equations [1] according to the heteroscedastic linear two-level structure of the data (i.e., hierarchical where, participant is the clustering variable) following standard multilevel multiple imputation methods. [1-4] We used two-level predictive mean matching for BMI and education level, which is a semi-parametric imputation method that limits imputations

1  
2  
3 to the observed values and can preserve non-linear relations in the observed data, therefore the  
4  
5 imputations do not deviate from the observed distribution[5] and two-level logistic regression for  
6  
7 imputing menstrual status, using the rest of the dataset as the predictors. As per published  
8  
9 recommendations,[1, 2] we also included the raw pain variable (i.e., with the missing values) as a  
10  
11 predictor, to account for the possibility of an association between the missingness pattern of pain  
12  
13 to these imputed variables. To assess the plausibility of the imputations and any significant  
14  
15 deviance from the structure of the raw, non-imputed data, we inspected the imputation  
16  
17 convergence plots, distributions of the imputed variables which are provided in Supplementary  
18  
19 Figures 3 and 4.  
20  
21  
22

23  
24 *Model specification.* We used a zero-inflated negative binomial (ZINB) distribution when  
25  
26 modeling the total pain outcome, as it has been demonstrated to provide the best fit for outcomes  
27  
28 with over-dispersion and zero-inflation.[6-8] ZINB models consider two sources of zero  
29  
30 observations: “sampling zeros” that are part of the underlying sampling distribution (i.e.,  
31  
32 negative binomial) and “structural zeros” that cannot score anything other than zero (i.e.,  
33  
34 participant did not track).[6] This virtue of the ZINB models allows for specification of the  
35  
36 imputed zeros and prevents the risk of over-estimating effects and generates more conservative  
37  
38 estimates for predictors of interest by estimating a separate zero-inflation term, as well as  
39  
40 conditional model.[6] We specified the zero-inflation term such that it was dependent on the  
41  
42 exercise variable for the day, in addition to specifying an overall general zero-inflation structure  
43  
44 in the outcome through inclusion of an intercept, based on recommendations. [8] Menstrual  
45  
46 status was not a significant predictor of zero-inflation and therefore removed from the zero-  
47  
48 inflation term during the modeling process. We included participants who had at least 11 pairs of  
49  
50 consecutive days of data in the final analytic sample as this provided sufficient amount of data to  
51  
52  
53  
54  
55  
56  
57  
58  
59  
60



1  
2  
3 1) ensure model convergence and improve reliability and accuracy of the estimates, particularly  
4 the random effects and their variances[9-12], and 2) adequately infer participants' habitual  
5 weekly exercise frequency by considering at least three weeks' worth of tracking to compute the  
6 weekly exercise frequency.  
7  
8  
9  
10  
11  
12  
13  
14  
15  
16  
17  
18  
19  
20  
21  
22  
23  
24  
25  
26  
27  
28  
29  
30  
31  
32  
33  
34  
35  
36  
37  
38  
39  
40  
41  
42  
43  
44  
45  
46  
47  
48  
49  
50  
51  
52  
53  
54  
55  
56  
57  
58  
59  
60

## Supplementary File 2. Imputation Model diagnostics.

Appropriateness and plausibility of the estimates from imputed models were inspected following published guidelines. First, we used measures of missing data information to assess pooled estimate variances. The fraction of missing information ( $\lambda$ ) is interpreted as the proportion of variation in the parameter of interest due to the missing data. The relative increase in variance due to nonresponse ( $r$ ) is interpreted as the proportional increase in the sampling variance of the parameter of interest that is due to the missing data. Values of  $\lambda$  over 0.5 indicate that the influence of the imputation model on the results is larger than that of the complete-data model, suggesting potential problems in the imputations. Supplementary Table 1 provides results of these variance estimates, indicating satisfactory imputation and model fit.

**Supplementary Table 1. Measures of Missing data information**

| Conditional Fixed Effects         | Total Pain Score |      | Difference in Pain |      |
|-----------------------------------|------------------|------|--------------------|------|
|                                   | $\lambda$        | $r$  | $\lambda$          | $r$  |
| Intercept                         | 0.21             | 0.27 | 0.23               | 0.31 |
| Menstrual Status                  | 0.13             | 0.15 | 0.19               | 0.23 |
| Previous Day Pain                 | 0.01             | 0.01 | 0.00               | 0.00 |
| Body Mass Index                   | 0.13             | 0.15 | 0.23               | 0.31 |
| Mean Weekly Exercise Frequency    | 0.00             | 0.00 | 0.01               | 0.01 |
| Previous Day exercise             | 0.01             | 0.01 | 0.00               | 0.00 |
| Some College Education Level      | 0.26             | 0.36 | 0.35               | 0.55 |
| College or Higher Education Level | 0.23             | 0.31 | 0.21               | 0.28 |
| Mean Weekly Exercise Frequency *  | 0.00             | 0.00 | 0.00               | 0.00 |
| Previous Day exercise             |                  |      |                    |      |
| <b>Zero Inflation Terms</b>       |                  |      |                    |      |
| Intercept                         | 0.00             | 0.00 | 0.00               | 0.00 |
| Same Day Exercise                 | 0.00             | 0.00 | 0.00               | 0.00 |

Next, we inspected propensity scores, which is a more recent and increasingly accepted method for inspecting the suitability of data imputation.[2, 13, 14] The goal is to compare the distributions of observed and imputed data conditional on the missingness probability. Under the missing at random (MAR) assumption, the conditional distributions of the observed and missing data should be similar if the assumed model for creating multiple imputations has a good fit. To do this, we first estimate the probability of each record being incomplete (i.e., “response propensity”) in the presence of missing data by conditioning on the response indicators as well as the observed covariates. The probabilities are then averaged over the imputed datasets to obtain stability. Supplementary Figure 3 plots BMI, education category

and menstrual status against the propensity score in each dataset. The distributions of the blue and red points are match up well without significant discrepancies (e.g., mismatch in patterns, imputed data systematically shifted toward one side of the axis).

Supplementary Table 2. Post-hoc analyses with endometriosis diagnosis included as a covariate. Conditional model results of the negative binomial model estimation of day-level total pain score (N=608).

| <b>Random Effects</b>                                | <b>Variance (95% CI)</b> |                |
|------------------------------------------------------|--------------------------|----------------|
| Participant (Intercept)                              | 1.10 (0.99, 1.22)        |                |
| <b>Fixed Effects</b>                                 | <b>Log Odds (SE)</b>     | <b>z-score</b> |
| Intercept                                            | 1.37*** (0.12)           | 10.97          |
| Menstrual Status                                     | 0.25*** (0.01)           | 21.40          |
| Previous day Pain                                    | 0.02*** (0.01)           | 21.40          |
| Body Mass Index                                      | 0.01* (0.004)            | 2.81           |
| Mean weekly Exercise Frequency                       | -0.06** (0.02)           | -3.01          |
| Previous day exercise                                | 0.09** (0.02)            | 3.85           |
| Clinician diagnosis of endometriosis                 | -0.07 (0.10)             | 0.01           |
| Self-diagnosis of endometriosis                      | -0.11 (0.11)             | -1.01          |
| Some college education level                         | 0.22 (0.13)              | -1.63          |
| College or higher education level                    | -0.01 (0.12)             | -0.12          |
| Mean weekly Exercise Frequency*Previous day exercise | -0.03*** (0.01)          | -3.42          |

SE=Standard Error. \*p=0.001, \*\* p <0.001, \*\*\*p<0.0001. B coefficients are rate ratios. BMI =Body Mass Index. BMI and previous day pain were group mean centered.

Supplementary Table 3. Post-hoc analyses with endometriosis diagnosis included as a covariate. Conditional model results of the regression model estimation of pain score difference (N=1009).

| Conditional Random Effects | Variance (95% CI)    |  |
|----------------------------|----------------------|--|
| Participant (Intercept)    | 13.34 (12.09, 14.93) |  |

  

| Fixed Effects                                        | B coefficient (SE) | z-score |
|------------------------------------------------------|--------------------|---------|
| Intercept                                            | 2.45*** (0.46)     | 5.22    |
| Menstrual status                                     | 1.46*** (0.08)     | 16.98   |
| Previous day pain                                    | -0.86*** (0.01)    | -144.11 |
| Body mass index                                      | 0.07* (0.01)       | 4.47    |
| Mean weekly exercise frequency                       | -0.27** (0.09)     | -3.03   |
| Previous day exercise                                | 0.92*** (0.18)     | 5.13    |
| Clinician diagnosis of endometriosis                 | -0.05 (0.32)       | -0.16   |
| Self-diagnosis of endometriosis                      | -0.45 (0.43)       | -1.29   |
| Some college education level                         | -0.30 (0.51)       | -0.58   |
| College or higher education level                    | -1.72** (0.47)     | -3.67   |
| Mean weekly exercise frequency*Previous day exercise | -0.14* (0.06)      | -2.31   |

SE=Standard Error. \*p<0.05, \*\* p <0.01, \*\*\*p<0.0001. Body Mass Index and previous day pain were group mean centered.

### References

1. van Buuren S, Groothuis-Oudshoorn K. mice: Multivariate Imputation by Chained Equations in R. Journal of Statistical Software; Vol 1, Issue 3 (2011). 2011.
2. Van Buuren S. Flexible imputation of missing data: CRC press; 2018.
3. Grund S, Lüdtke O, Robitzsch A. Multiple imputation of missing data for multilevel models: Simulations and recommendations. Organizational Research Methods. 2018;21(1):111-49.
4. Barnard J, Rubin DB. Small-Sample Degrees of Freedom with Multiple Imputation. Biometrika. 1999;86(4):948-55.
5. Little RJ. Missing-data adjustments in large surveys. Journal of Business & Economic Statistics. 1988;6(3):287-96.

6. Hu M-C, Pavlicova M, Nunes EV. Zero-inflated and hurdle models of count data with extra zeros: examples from an HIV-risk reduction intervention trial. *Am J Drug Alcohol Abuse*. 2011;37(5):367-75. doi: 10.3109/00952990.2011.597280. PubMed PMID: 21854279.
7. Brooks ME, Kristensen K, van Benthem KJ, Magnusson A, Berg CW, Nielsen A, et al. glmmTMB balances speed and flexibility among packages for zero-inflated generalized linear mixed modeling. *The R journal*. 2017;9(2):378-400.
8. Brooks ME, Kristensen K, van Benthem KJ, Magnusson A, Berg CW, Nielsen A, et al. Modeling zero-inflated count data with glmmTMB. *bioRxiv*. 2017:132753. doi: 10.1101/132753.
9. Schunck R. Cluster Size and Aggregated Level 2 Variables in Multilevel Models. A Cautionary Note. 2016. 2016;10(1). Epub 2016-07-20. doi: 10.12758/mda.2016.005.
10. Bell B, Ferron J, Kromrey J, editors. Cluster Size in Multilevel Models: The Impact of Sparse Data Structures on Point and Interval Estimates in Two-Level Models 2008.
11. Austin PC, Leckie G. The effect of number of clusters and cluster size on statistical power and Type I error rates when testing random effects variance components in multilevel linear and logistic regression models. *Journal of Statistical Computation and Simulation*. 2018;88(16):3151-63. doi: 10.1080/00949655.2018.1504945.
12. Snijders TAB. Power and sample size in multilevel modeling. In: Everitt B, Howell D, editors. *Encyclopedia of Statistics in Behavioral Science*. 3: Wiley; 2006. p. 1570–3.
13. Nguyen CD, Carlin JB, Lee KJ. Model checking in multiple imputation: an overview and case study. *Emerging Themes in Epidemiology*. 2017;14(1):8. doi: 10.1186/s12982-017-0062-6.
14. Bondarenko I, Raghunathan T. Graphical and numerical diagnostic tools to assess suitability of multiple imputations and imputation models. *Statistics in Medicine*. 2016;35(17):3007-20. doi: <https://doi.org/10.1002/sim.6926>.

1  
2  
3  
4  
5  
6  
7  
8  
9  
10  
11  
12  
13  
14  
15  
16  
17  
18  
19  
20  
21  
22  
23  
24  
25  
26  
27  
28  
29  
30  
31  
32  
33  
34  
35  
36  
37  
38  
39  
40  
41  
42  
43  
44  
45  
46  
47  
48  
49  
50  
51  
52  
53  
54  
55  
56  
57  
58  
59  
60

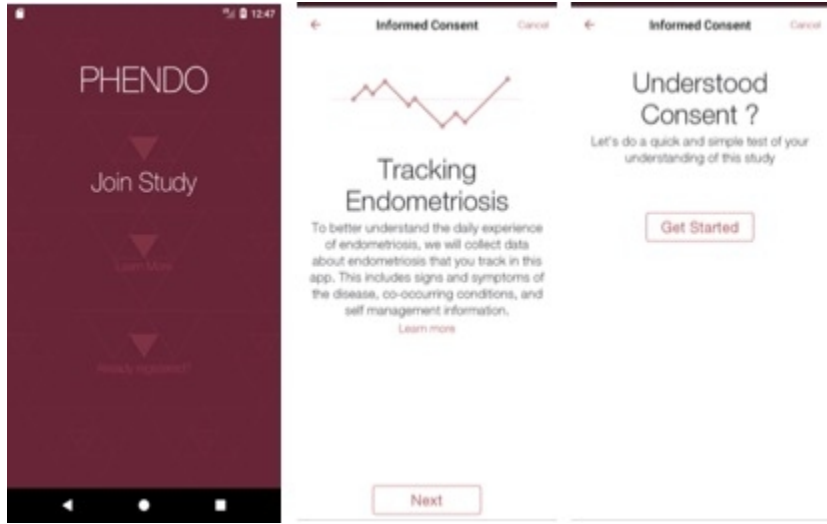

34x22mm (300 x 300 DPI)

1  
2  
3  
4  
5  
6  
7  
8  
9  
10  
11  
12  
13  
14  
15  
16  
17  
18  
19  
20  
21  
22  
23  
24  
25  
26  
27  
28  
29  
30  
31  
32  
33  
34  
35  
36  
37  
38  
39  
40  
41  
42  
43  
44  
45  
46  
47  
48  
49  
50  
51  
52  
53  
54  
55  
56  
57  
58  
59  
60



109x109mm (118 x 118 DPI)

1  
2  
3  
4  
5  
6  
7  
8  
9  
10  
11  
12  
13  
14  
15  
16  
17  
18  
19  
20  
21  
22  
23  
24  
25  
26  
27  
28  
29  
30  
31  
32  
33  
34  
35  
36  
37  
38  
39  
40  
41  
42  
43  
44  
45  
46  
47  
48  
49  
50  
51  
52  
53  
54  
55  
56  
57  
58  
59  
60

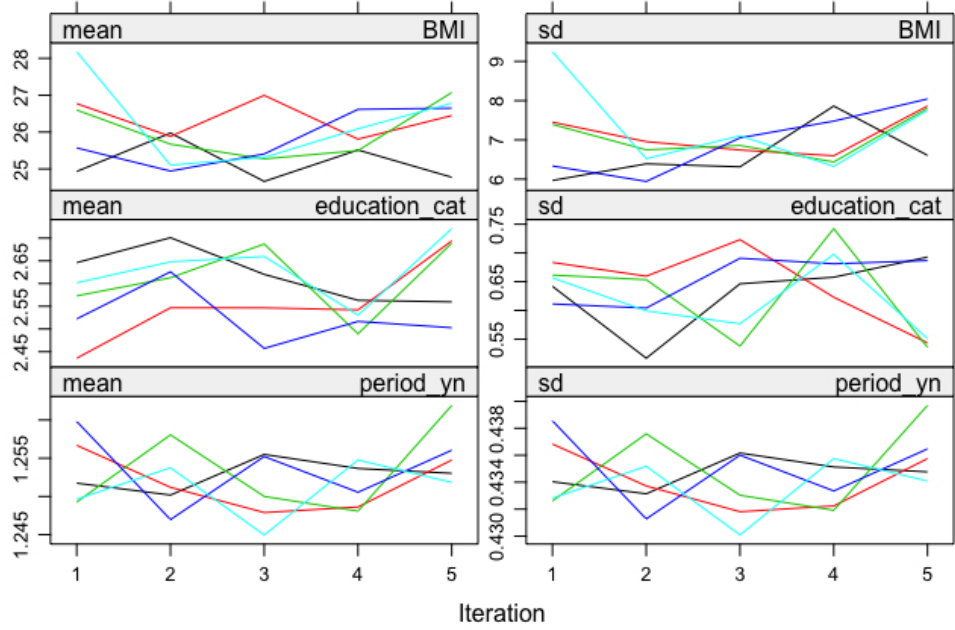

142x99mm (118 x 118 DPI)





34x45mm (300 x 300 DPI)

1  
2  
3  
4  
5  
6  
7  
8  
9  
10  
11  
12  
13  
14  
15  
16  
17  
18  
19  
20  
21  
22  
23  
24  
25  
26  
27  
28  
29  
30  
31  
32  
33  
34  
35  
36  
37  
38  
39  
40  
41  
42  
43  
44  
45  
46  
47  
48  
49  
50  
51  
52  
53  
54  
55  
56  
57  
58  
59  
60



23x44mm (300 x 300 DPI)

## STROBE Statement—checklist of items that should be included in reports of observational studies

|                           | Item No. | Recommendation                                                                                                                                                                                                                                                                                                                                                                                                                                                         | Page # where this item is located: |
|---------------------------|----------|------------------------------------------------------------------------------------------------------------------------------------------------------------------------------------------------------------------------------------------------------------------------------------------------------------------------------------------------------------------------------------------------------------------------------------------------------------------------|------------------------------------|
| <b>Title and abstract</b> | 1        | (a) Indicate the study's design with a commonly used term in the title or the abstract                                                                                                                                                                                                                                                                                                                                                                                 | 1,2                                |
|                           |          | (b) Provide in the abstract an informative and balanced summary of what was done and what was found                                                                                                                                                                                                                                                                                                                                                                    | 2                                  |
| <b>Introduction</b>       |          |                                                                                                                                                                                                                                                                                                                                                                                                                                                                        |                                    |
| Background/rationale      | 2        | Explain the scientific background and rationale for the investigation being reported                                                                                                                                                                                                                                                                                                                                                                                   | 6-7                                |
| Objectives                | 3        | State specific objectives, including any prespecified hypotheses                                                                                                                                                                                                                                                                                                                                                                                                       | 8                                  |
| <b>Methods</b>            |          |                                                                                                                                                                                                                                                                                                                                                                                                                                                                        |                                    |
| Study design              | 4        | Present key elements of study design early in the paper                                                                                                                                                                                                                                                                                                                                                                                                                | 8-9                                |
| Setting                   | 5        | Describe the setting, locations, and relevant dates, including periods of recruitment, exposure, follow-up, and data collection                                                                                                                                                                                                                                                                                                                                        | 8-9                                |
| Participants              | 6        | (a) <i>Cohort study</i> —Give the eligibility criteria, and the sources and methods of selection of participants. Describe methods of follow-up<br><i>Case-control study</i> —Give the eligibility criteria, and the sources and methods of case ascertainment and control selection. Give the rationale for the choice of cases and controls<br><i>Cross-sectional study</i> —Give the eligibility criteria, and the sources and methods of selection of participants | 8-9                                |
|                           |          | (b) <i>Cohort study</i> —For matched studies, give matching criteria and number of exposed and unexposed                                                                                                                                                                                                                                                                                                                                                               | N/A                                |

|                              |    |                                                                                                                                                                                      |          |
|------------------------------|----|--------------------------------------------------------------------------------------------------------------------------------------------------------------------------------------|----------|
|                              |    | <i>Case-control study</i> —For matched studies, give matching criteria and the number of controls per case                                                                           |          |
| Variables                    | 7  | Clearly define all outcomes, exposures, predictors, potential confounders, and effect modifiers. Give diagnostic criteria, if applicable                                             | 10-12    |
| Data sources/<br>measurement | 8* | For each variable of interest, give sources of data and details of methods of assessment (measurement). Describe comparability of assessment methods if there is more than one group | 10-12    |
| Bias                         | 9  | Describe any efforts to address potential sources of bias                                                                                                                            | 10,11,14 |
| Study size                   | 10 | Explain how the study size was arrived at                                                                                                                                            | 8,9      |

Continued on next page

|                        |     |                                                                                                                                                                                                                                                                                                           |                             |
|------------------------|-----|-----------------------------------------------------------------------------------------------------------------------------------------------------------------------------------------------------------------------------------------------------------------------------------------------------------|-----------------------------|
| Quantitative variables | 11  | Explain how quantitative variables were handled in the analyses. If applicable, describe which groupings were chosen and why                                                                                                                                                                              | 10-11                       |
| Statistical methods    | 12  | (a) Describe all statistical methods, including those used to control for confounding                                                                                                                                                                                                                     | 13-14                       |
|                        |     | (b) Describe any methods used to examine subgroups and interactions                                                                                                                                                                                                                                       | 13                          |
|                        |     | (c) Explain how missing data were addressed                                                                                                                                                                                                                                                               | 13, Supplemental Files 1-2  |
|                        |     | (d) <i>Cohort study</i> —If applicable, explain how loss to follow-up was addressed<br><i>Case-control study</i> —If applicable, explain how matching of cases and controls was addressed<br><i>Cross-sectional study</i> —If applicable, describe analytical methods taking account of sampling strategy | 13-14                       |
|                        |     | (e) Describe any sensitivity analyses                                                                                                                                                                                                                                                                     | 14, and Supplemental Tables |
| <b>Results</b>         |     |                                                                                                                                                                                                                                                                                                           |                             |
| Participants           | 13* | (a) Report numbers of individuals at each stage of study—eg numbers potentially eligible, examined for eligibility, confirmed eligible, included in the study, completing follow-up, and analysed                                                                                                         | 14                          |
|                        |     | (b) Give reasons for non-participation at each stage                                                                                                                                                                                                                                                      | 9, 14                       |
|                        |     | (c) Consider use of a flow diagram                                                                                                                                                                                                                                                                        | N/A                         |
| Descriptive data       | 14* | (a) Give characteristics of study participants (eg demographic, clinical, social) and information on exposures and potential confounders                                                                                                                                                                  | 14, and Table 1             |
|                        |     | (b) Indicate number of participants with missing data for each variable of interest                                                                                                                                                                                                                       | 13-14, Table 1              |
|                        |     | (c) <i>Cohort study</i> —Summarise follow-up time (eg, average and total amount)                                                                                                                                                                                                                          | N/A                         |
| Outcome data           | 15* | <i>Cohort study</i> —Report numbers of outcome events or summary measures over time                                                                                                                                                                                                                       | N/A                         |
|                        |     | <i>Case-control study</i> —Report numbers in each exposure category, or summary measures of exposure                                                                                                                                                                                                      | N/A                         |
|                        |     | <i>Cross-sectional study</i> —Report numbers of outcome events or summary measures                                                                                                                                                                                                                        | 15-16                       |
| Main results           | 16  | (a) Give unadjusted estimates and, if applicable, confounder-adjusted estimates and their precision (eg, 95% confidence interval). Make clear which confounders were adjusted for and why they were included                                                                                              | 15-16, Tables 2 and 3       |

1  
2  
3  
4  
5  
6  
7  
8  
9  
10  
11  
12  
13  
14  
15  
16  
17  
18  
19  
20  
21  
22  
23  
24  
25  
26  
27  
28  
29  
30  
31  
32  
33  
34  
35  
36  
37  
38  
39  
40  
41  
42  
43  
44  
45  
46

---

|                                                                                                                  |       |
|------------------------------------------------------------------------------------------------------------------|-------|
| (b) Report category boundaries when continuous variables were categorized                                        | 14-15 |
| (c) If relevant, consider translating estimates of relative risk into absolute risk for a meaningful time period | N/A   |

---

Continued on next page

For peer review only

|                          |    |                                                                                                                                                                            |                                |
|--------------------------|----|----------------------------------------------------------------------------------------------------------------------------------------------------------------------------|--------------------------------|
| Other analyses           | 17 | Report other analyses done—eg analyses of subgroups and interactions, and sensitivity analyses                                                                             | 15-16, and Supplemental Tables |
| <b>Discussion</b>        |    |                                                                                                                                                                            |                                |
| Key results              | 18 | Summarise key results with reference to study objectives                                                                                                                   | 16-17                          |
| Limitations              | 19 | Discuss limitations of the study, taking into account sources of potential bias or imprecision. Discuss both direction and magnitude of any potential bias                 | 20-21                          |
| Interpretation           | 20 | Give a cautious overall interpretation of results considering objectives, limitations, multiplicity of analyses, results from similar studies, and other relevant evidence | 17-19                          |
| Generalisability         | 21 | Discuss the generalisability (external validity) of the study results                                                                                                      | 20-21                          |
| <b>Other information</b> |    |                                                                                                                                                                            |                                |
| Funding                  | 22 | Give the source of funding and the role of the funders for the present study and, if applicable, for the original study on which the present article is based              | 22                             |
