# Supplementary material for: Associations between physical exercise patterns and pain symptoms in individuals with endometriosis: a cross-sectional mHealth-based investigation
Source: PubMed Central journal article supplement — BMJ Open. 2022 Jul 18;12(7):e059280. doi: 10.1136/bmjopen-2021-059280 (PMC9297219; doi:10.1136/bmjopen-2021-059280), 2022-07-18
Supplement: bmjopen-2021-059280supp002.pdf [file bmjopen-2021-059280supp002.pdf]

**Track This Moment** 

Thu 18 Feb 08 16 AM

**Fri 19 Feb 09 17 PM**

Sat 20 Feb 10 18

Are you in pain now?

Any GI/Urine issues?

Experiencing something else?

How is your mood?

Are you bleeding?

Take any medication?

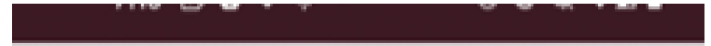

Cancel

What's happening in your gastrointestinal/urinary system?

'b  
Infel  
lovement

Bs  
Blood in  
stool

Uf  
Frequent  
Urination

Cp  
Can't  
Urinate

Up  
Painful  
Urination

How severe is the symptom?

Mi  
Mild

Mo  
Moderate

Se  
Severe

 Profile

 Review

 Track

 Insights

 Citizen

Done
