# Supplementary material for: Associations between physical exercise patterns and pain symptoms in individuals with endometriosis: a cross-sectional mHealth-based investigation
Source: HighWire-hosted journal article supplement (doi:10.1136/bmjopen-2021-059280), 2022-07-01

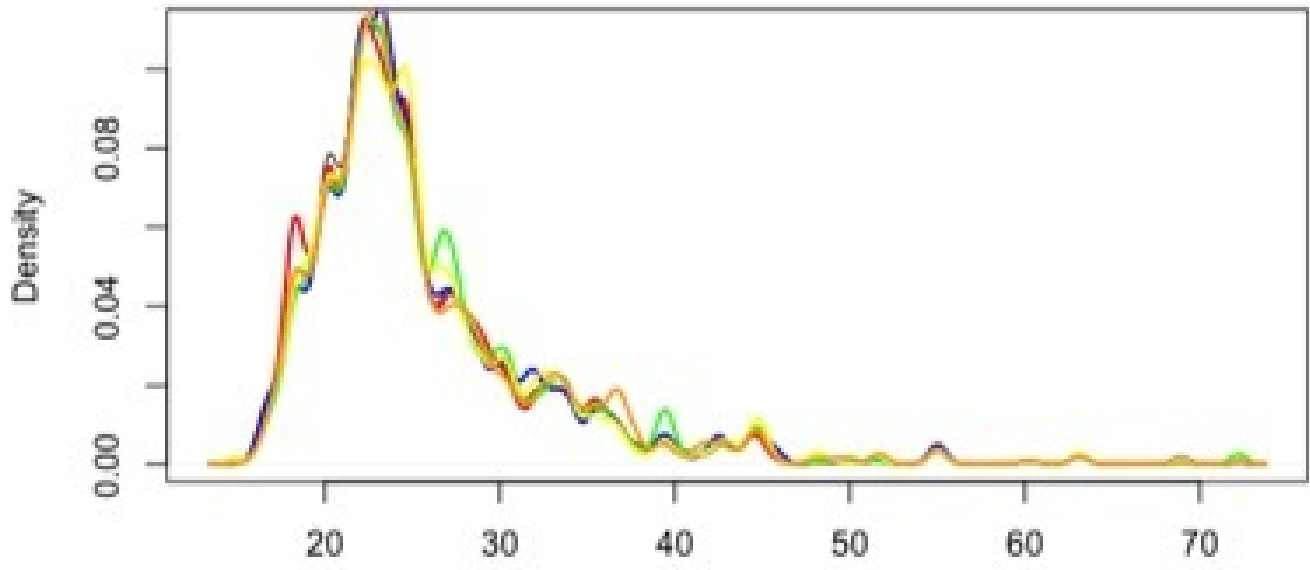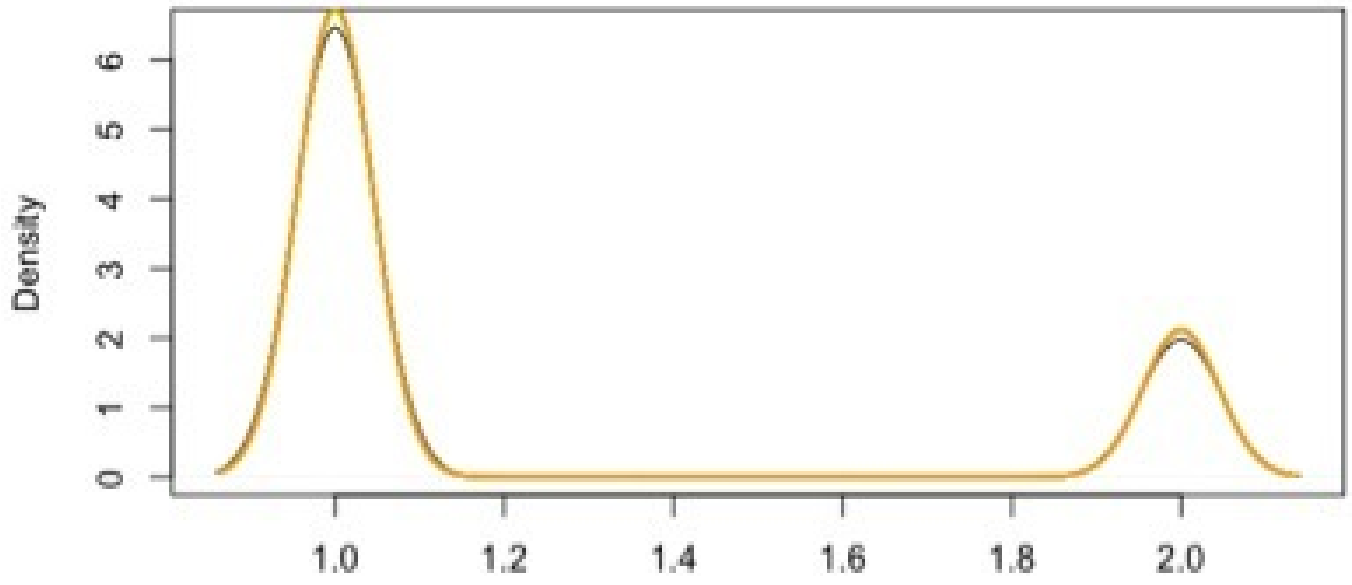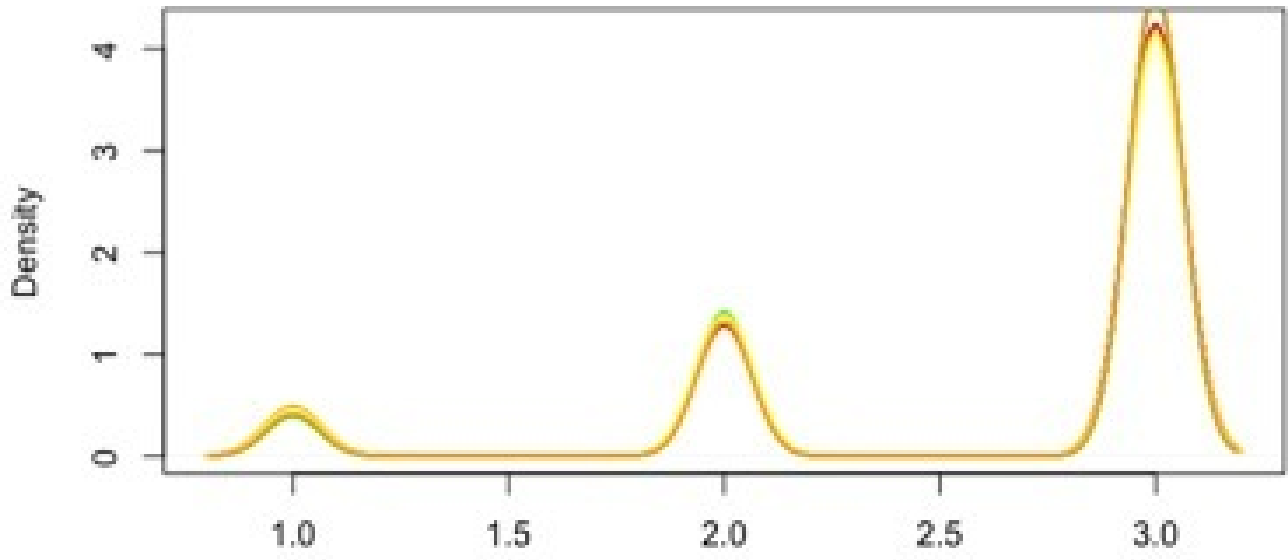

Supplement: bmjopen-2021-059280supp005_data_supplement.pdf [file bmjopen-2021-059280supp005_data_supplement.pdf]
