# Supplementary figures and images for: Associations between physical exercise patterns and pain symptoms in individuals with endometriosis: a cross-sectional mHealth-based investigation
Source: PubMed Central journal article supplement — BMJ Open. 2022 Jul 18;12(7):e059280. doi: 10.1136/bmjopen-2021-059280 (PMC9297219; doi:10.1136/bmjopen-2021-059280), 2022-07-18

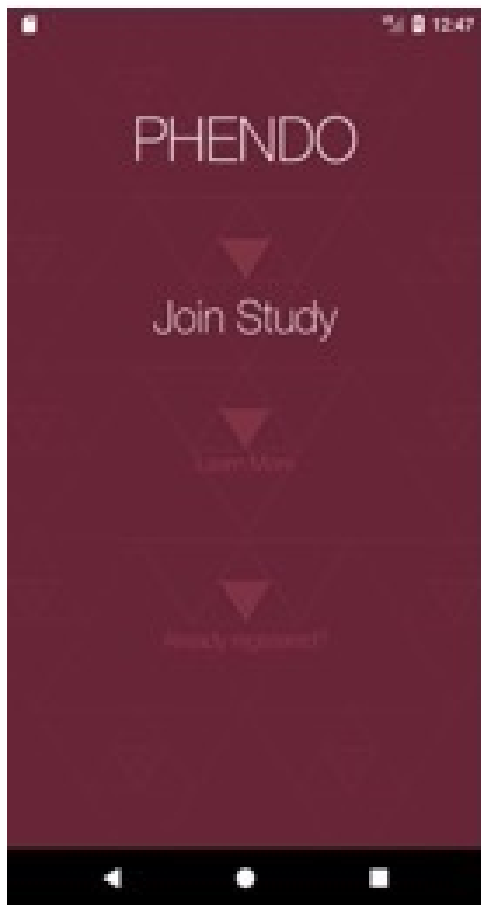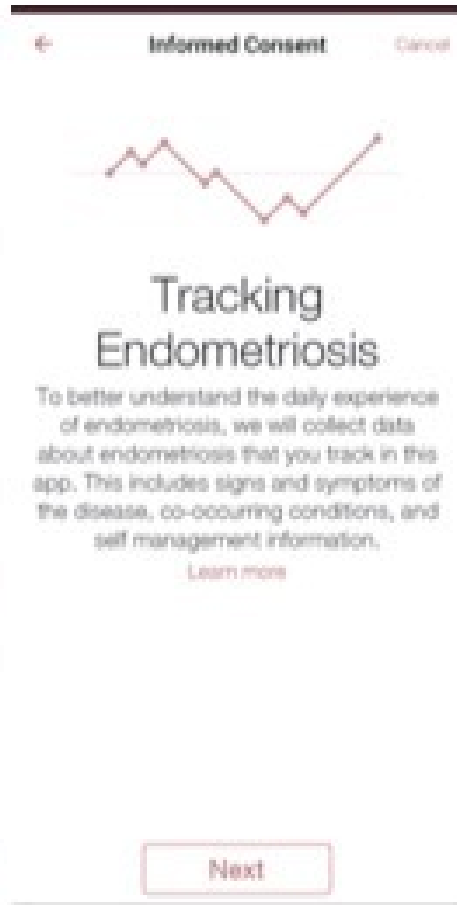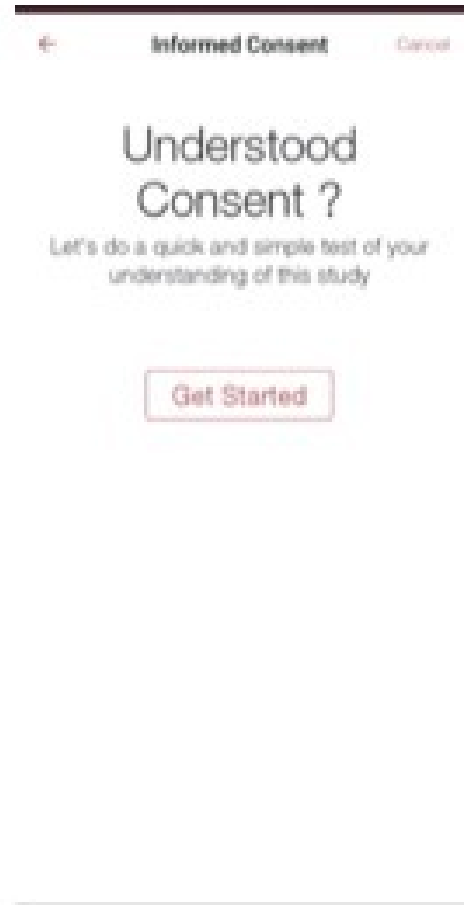

Supplement: bmjopen-2021-059280supp001.pdf [file bmjopen-2021-059280supp001.pdf]

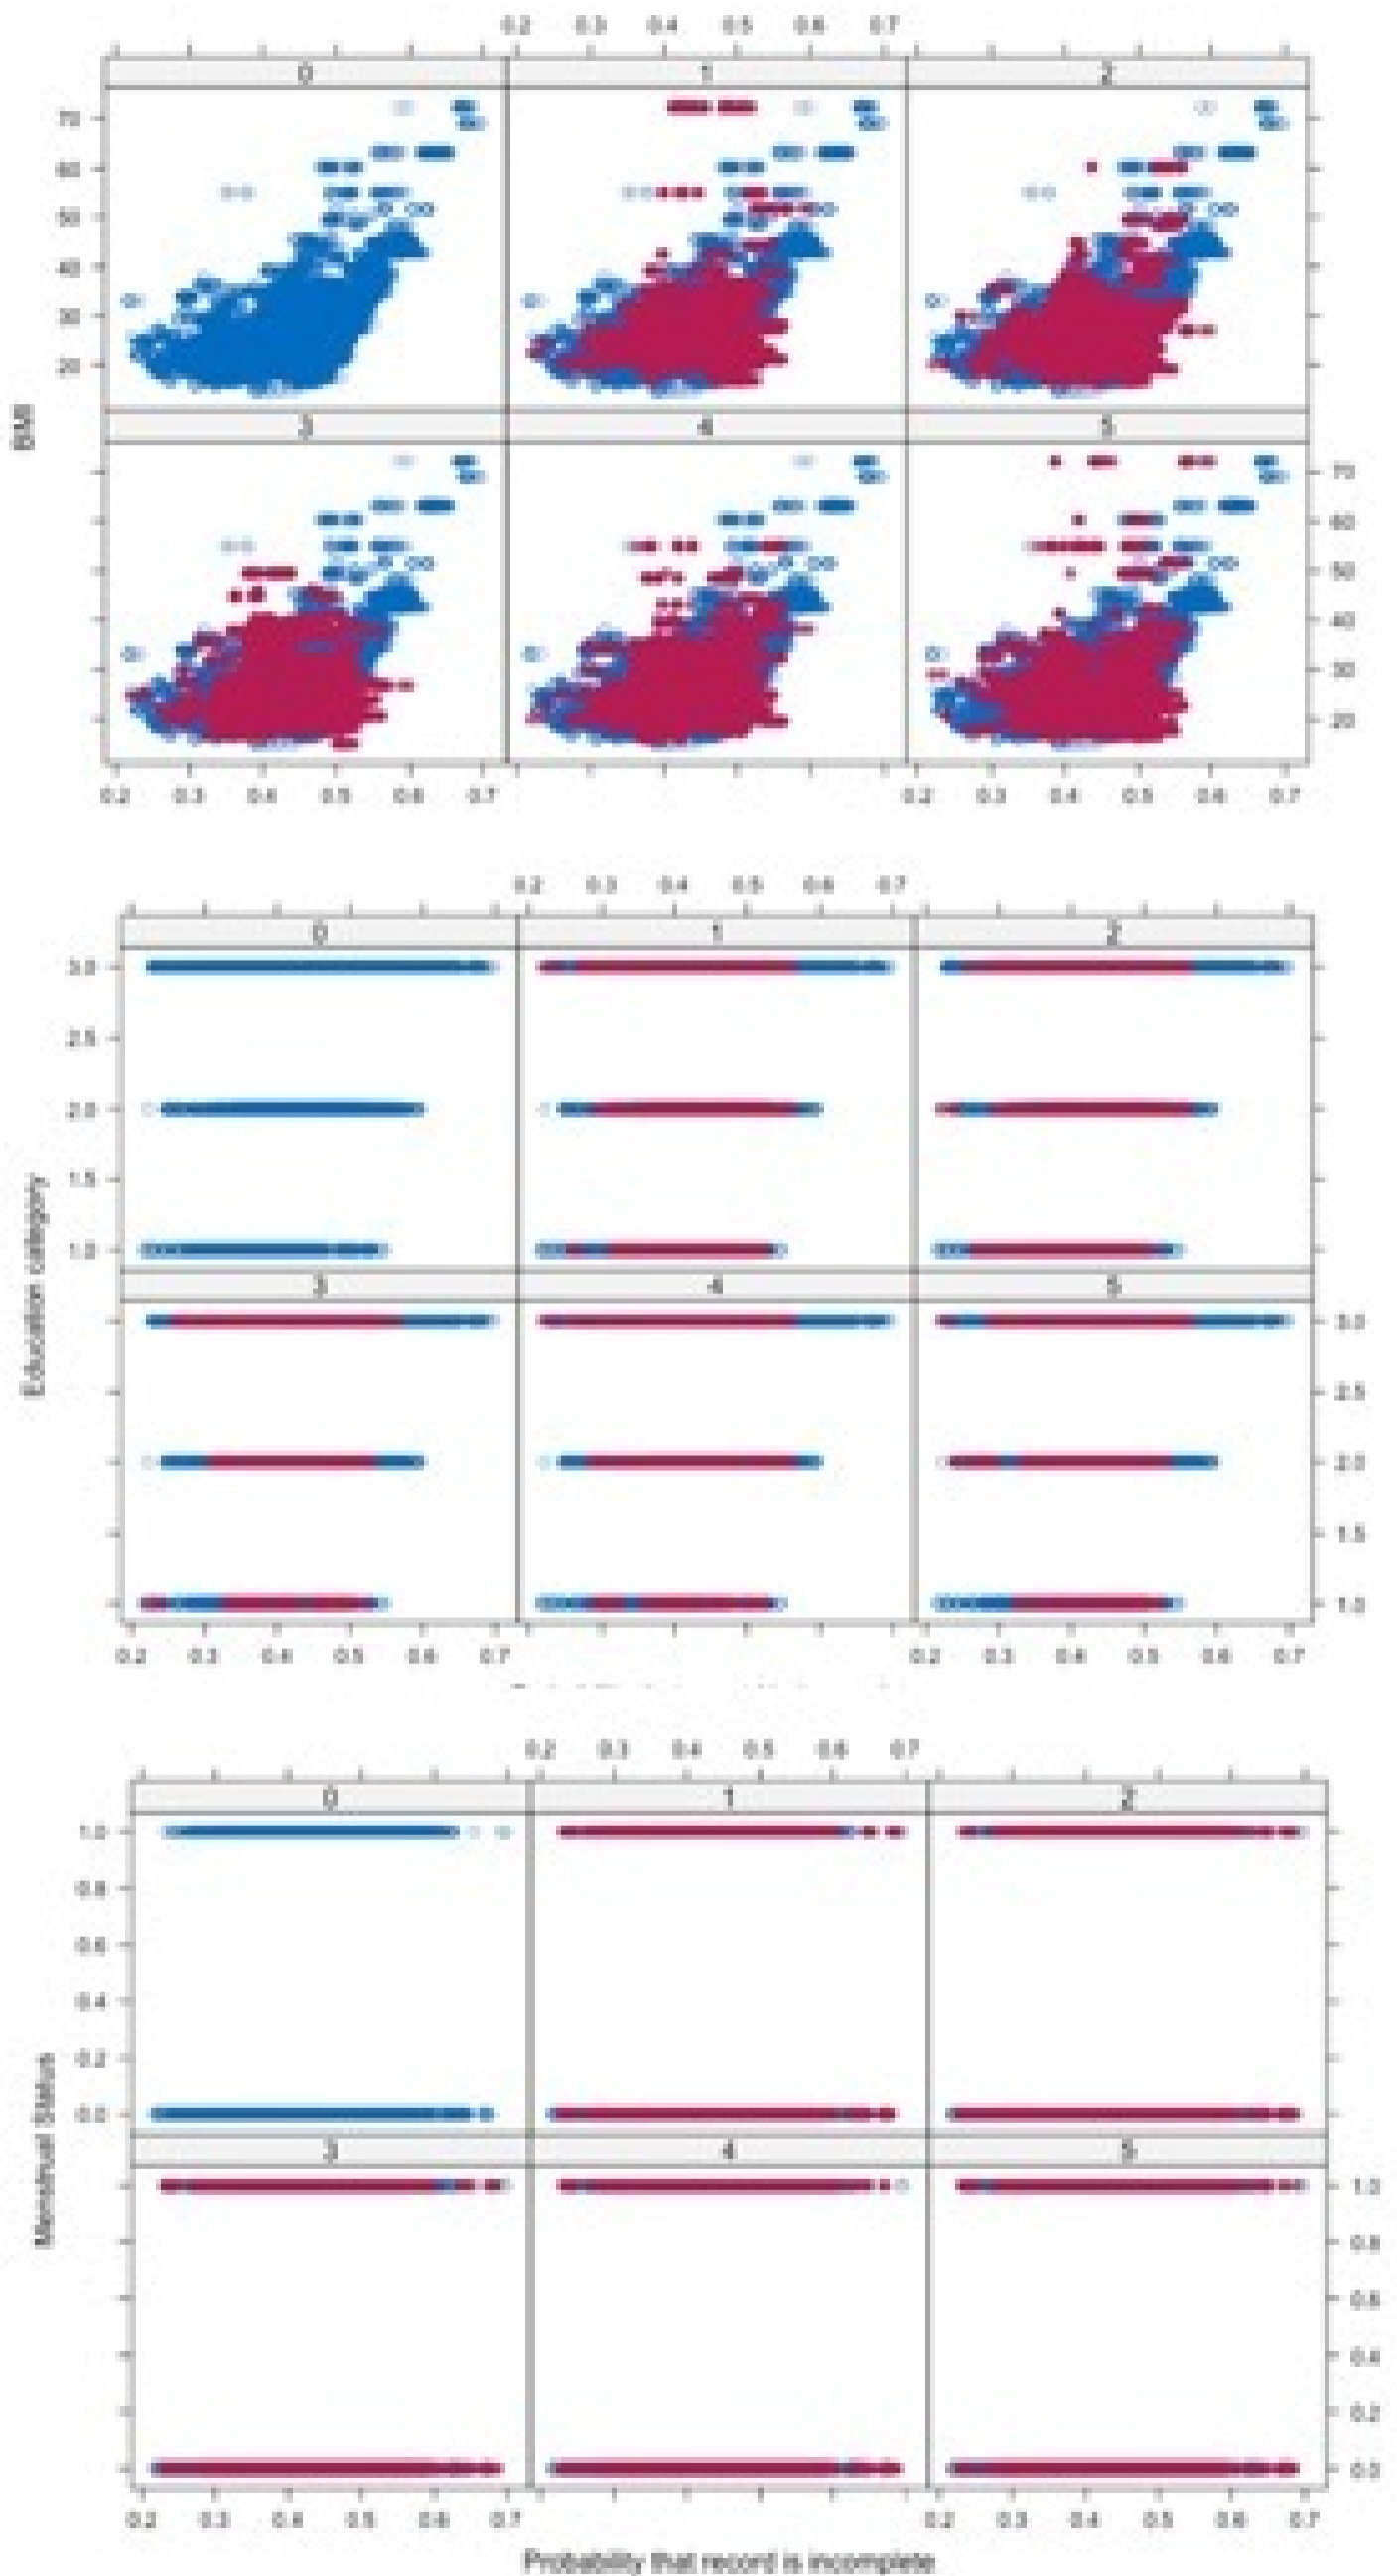

Supplement: bmjopen-2021-059280supp006.pdf [file bmjopen-2021-059280supp006.pdf]
